# Supplementary material for: CRISPR elements provide a new framework for the genealogy of the citrus canker pathogen Xanthomonas citri pv. citri
Source: PubMed Central journal article supplement (PMC6889575; doi:10.1186/s12864-019-6267-z), 2019-12-02
Supplement: 12864_2019_6267_MOESM7_ESM.pdf [file 12864_2019_6267_MOESM7_ESM.pdf]

**Table S1.** BLASTN database searches for spacer-related sequences at NCBI GenBank.

| Spacer                                           | Annotation                                                                                                                       | Acc. No. | E-value     | Identity (%) |
|--------------------------------------------------|----------------------------------------------------------------------------------------------------------------------------------|----------|-------------|--------------|
| Xcc_37                                           | <i>Xanthomonas</i> phage CP1 DNA, complete genome                                                                                | AB720063 | 0.40        | 27/30 (90%)  |
| Xcc_36                                           | <i>Xanthomonas</i> phage CP1 DNA, complete genome                                                                                | AB720063 | 5e-06       | 33/34 (97%)  |
|                                                  | <i>Bradymonas sediminis</i> strain FA350 chromosome, complete genome                                                             | CP030032 | 0.40        | 25/27 (93%)  |
| Xcc_35                                           | <i>Xanthomonas</i> phage phi Xc10, complete genome                                                                               | MF375456 | 1e-06       | 34/35 (97%)  |
|                                                  | <i>Xanthomonas</i> phage f30-Xaj, complete genome                                                                                | KU595433 | 2e-05       | 33/35 (94%)  |
|                                                  | <i>Xanthomonas</i> phage f20-Xaj, complete genome                                                                                | KU595432 | 2e-05       | 33/35 (94%)  |
|                                                  | <i>Xylella</i> phage Prado, complete genome                                                                                      | KF626667 | 8e-04       | 32/35 (91%)  |
|                                                  | <i>Xanthomonas</i> phage XAJ24, complete genome                                                                                  | KU197013 | 0.009       | 31/35 (89%)  |
|                                                  | blood disease bacterium R229, genomic contig 00006-1627                                                                          | FR854082 | 0.40        | 30/35 (86%)  |
| Xcc_34                                           | No significant hit                                                                                                               |          |             |              |
| Xcc_33                                           | <i>Xanthomonas</i> phage phi Xc10, complete genome                                                                               | MF375456 | 0.003       | 31/34 (91%)  |
| Xcc_32                                           | No significant hit                                                                                                               |          |             |              |
| Xcc_31                                           | <i>Xanthomonas</i> phage f30-Xaj, complete genome                                                                                | KU595433 | 3e-08       | 35/35 (100%) |
|                                                  | <i>Xanthomonas</i> phage f20-Xaj, complete genome                                                                                | KU595432 | 3e-08       | 35/35 (100%) |
|                                                  | <i>Xanthomonas</i> phage phi Xc10, complete genome                                                                               | MF375456 | 1e-06       | 34/35 (97%)  |
|                                                  | <i>Xylella</i> phage Prado, complete genome                                                                                      | KF626667 | 2e-05       | 33/35 (94%)  |
|                                                  | <i>Xanthomonas</i> phage XAJ24, complete genome                                                                                  | KU197013 | 8e-04       | 32/35 (91%)  |
|                                                  | blood disease bacterium R229, genomic contig 00006-1627                                                                          | FR854082 | 0.003       | 31/34 (91%)  |
|                                                  | <i>Ralstonia solanacearum</i> genome assembly 9 genomes, chromosome : I                                                          | LN899819 | 0.003       | 29/31 (94%)  |
|                                                  | <i>Xylella</i> phage Paz, complete genome                                                                                        | KF626666 | 0.009       | 28/30 (93%)  |
|                                                  | <i>Burkholderia</i> phage JG068, complete genome                                                                                 | KC853746 | 0.033       | 26/27 (96%)  |
|                                                  | <i>Actinopolymorpha singaporensis</i> strain DSM 22024 genome assembly, chromosome: I                                            | LT629732 | 0.11        | 25/26 (96%)  |
|                                                  | <i>Streptomyces dengpaensis</i> strain XZHG99 chromosome, complete genome                                                        | CP026652 | 0.40        | 24/25 (96%)  |
|                                                  | <i>Xylella taiwanensis</i> strain PLS235 chromosome, complete genome                                                             | CP011800 | 0.40        | 22/22 (100%) |
|                                                  | <i>Ralstonia</i> phage RSJ5 DNA, complete genome                                                                                 | AB983711 | 0.40        | 25/27 (93%)  |
| <i>Ralstonia</i> phage RSJ2 DNA, complete genome | AB920995                                                                                                                         | 0.40     | 25/27 (93%) |              |
| Xcc_30                                           | <i>Xanthomonas</i> phage phi Xc10, complete genome                                                                               | MF375456 | 0.003       | 31/34 (91%)  |
|                                                  | <i>Xanthomonas</i> phage f20-Xaj, complete genome                                                                                | KU595432 | 0.003       | 31/34 (91%)  |
|                                                  | <i>Actinomadura fulva</i> subsp. <i>indica</i> genomic DNA, fluvirucin biosynthetic genes, complete sequence, strain: ATCC 53714 | LC095592 | 0.11        | 28/31 (90%)  |
|                                                  | <i>Pseudomonas</i> sp. MRSN12121, complete genome                                                                                | CP010892 | 0.40        | 28/32 (88%)  |
|                                                  | <i>Pseudogulbenkiania</i> sp. NH8B DNA, complete genome                                                                          | AP012224 | 0.40        | 28/32 (88%)  |
|                                                  | <i>Cyclobacterium marinum</i> DSM 745, complete genome                                                                           | CP002955 | 0.40        | 25/27 (93%)  |
| Xcc_29                                           | No significant hit                                                                                                               |          |             |              |
| Xcc_28                                           | <i>Xanthomonas</i> phage CP1 DNA, complete genome                                                                                | AB720063 | 1e-07       | 34/34 (100%) |
|                                                  | <i>Xanthomonas</i> phage phi Xc10, complete genome                                                                               | MF375456 | 1e-07       | 34/34 (100%) |
|                                                  | <i>Xanthomonas</i> phage XAJ24, complete genome                                                                                  | KU197013 | 6e-05       | 32/34 (94%)  |
|                                                  | <i>Xanthomonas</i> phage f30-Xaj, complete genome                                                                                | KU595433 | 0.003       | 31/34 (91%)  |
|                                                  | <i>Xanthomonas</i> phage f20-Xaj, complete genome                                                                                | KU595432 | 0.003       | 31/34 (91%)  |

| Spacer | Annotation                                                                                                     | Acc. No. | E-value | Identity (%) |
|--------|----------------------------------------------------------------------------------------------------------------|----------|---------|--------------|
|        | <i>Caulobacter</i> phage Percy, complete genome                                                                | KT381879 | 0.11    | 23/23 (100%) |
|        | <i>Xylella</i> phage Prado, complete genome                                                                    | KF626667 | 0.11    | 23/23 (100%) |
|        | <i>Ralstonia solanacearum</i> genome assembly 9 genomes, chromosome : I                                        | LN899819 | 0.40    | 28/32 (88%)  |
| Xcc_27 | <i>Xanthomonas</i> phage XAJ24, complete genome                                                                | KU197013 | 2e-04   | 31/33 (94%)  |
|        | <i>Xanthomonas</i> phage f30-Xaj, complete genome                                                              | KU595433 | 0.40    | 28/32 (88%)  |
| Xcc_26 | No significant hit                                                                                             |          |         |              |
| Xcc_25 | <i>Xanthomonas</i> phage CP1 DNA, complete genome                                                              | AB720063 | 1e-06   | 32/32 (100%) |
| Xcc_24 | No significant hit                                                                                             |          |         |              |
| Xcc_23 | Perfectly matched to 31 <i>Xcc</i> genomes                                                                     |          | 3e-09   | 37/37 (100%) |
| Xcc_22 | Perfectly matched to 32 <i>Xcc</i> genomes                                                                     |          | 3e-08   | 35/35 (100%) |
|        | <i>Xanthomonas citri</i> pv. <i>vignicola</i> strain CFBP 7113, complete genome                                | CP022270 | 1e-07   | 34/34 (100%) |
|        | <i>Deinococcus</i> sp. S14-83 strain S14-83T plasmid unnamed2, complete sequence                               | CP034186 | 0.40    | 27/29 (93%)  |
|        | <i>Sphingopyxis</i> sp. QXT-31, complete genome                                                                | CP019449 | 0.40    | 25/27 (93%)  |
| Xcc_21 | Perfectly matched to 28 <i>Xcc</i> genomes                                                                     |          | 1e-07   | 34/34 (100%) |
| Xcc_20 | Perfectly matched to 31 <i>Xcc</i> genomes                                                                     |          | 3e-08   | 35/35 (100%) |
|        | <i>Xanthomonas citri</i> pv. <i>vignicola</i> strain CFBP 7113, complete genome                                | CP022270 | 0.009   | 31/35 (89%)  |
|        | <i>Xanthomonas citri</i> pv. <i>fuscans</i> CFBP 6988 chromosome                                               | CP026331 | 0.40    | 30/35 (86%)  |
|        | <i>Xanthomonas citri</i> pv. <i>phaseoli</i> var. <i>fuscans</i> strain CFBP 6991 chromosome, complete genome  | CP021015 | 0.40    | 30/35 (86%)  |
|        | <i>Xanthomonas citri</i> pv. <i>phaseoli</i> var. <i>fuscans</i> strain CFBP 6990 chromosome, complete genome  | CP020983 | 0.40    | 30/35 (86%)  |
|        | <i>Xanthomonas citri</i> pv. <i>phaseoli</i> var. <i>fuscans</i> strain CFBP 6989 chromosome, complete genome  | CP020981 | 0.40    | 30/35 (86%)  |
|        | <i>Xanthomonas citri</i> pv. <i>phaseoli</i> var. <i>fuscans</i> strain CFBP 6988R chromosome, complete genome | CP020979 | 0.40    | 30/35 (86%)  |
|        | <i>Bradyrhizobium</i> sp. CCBAU 51670 chromosome, complete genome                                              | CP030053 | 0.40    | 22/22 (100%) |
|        | <i>Bradyrhizobium</i> sp. ORS 3257 isolate ORS3257 genome assembly, chromosome: BRAD3257                       | LS398110 | 0.40    | 22/22 (100%) |
|        | <i>Bradyrhizobium</i> sp. 3 85S1MB chromosome, complete genome                                                 | CP029427 | 0.40    | 22/22 (100%) |
| Xcc_19 | Perfectly matched to 30 <i>Xcc</i> genomes                                                                     |          | 1e-08   | 36/36 (100%) |
|        | <i>Xanthomonas citri</i> subsp. <i>citri</i> strain jx4, complete genome                                       | CP009013 | 0.003   | 28/29 (97%)  |
|        | <i>Streptomyces sporoclivatus</i> NBRC 100767 DNA, complete genome                                             | AP019620 | 0.40    | 28/32 (88%)  |
|        | <i>Enterobacter cancerogenus</i> strain CR-Eb1 chromosome, complete genome                                     | CP025225 | 0.40    | 25/27 (93%)  |
| Xcc_18 | Perfectly matched to 31 <i>Xcc</i> genomes                                                                     |          | 1e-08   | 36/36 (100%) |
|        | <i>Pelobacter propionicus</i> DSM 2379, complete genome                                                        | CP000482 | 0.11    | 30/33 (91%)  |
|        | <i>Herbaspirillum rubrisubalbicans</i> strain DSM 11543 chromosome, complete genome                            | CP024996 | 0.40    | 30/34 (88%)  |
|        | <i>Herbaspirillum rubrisubalbicans</i> M1, complete genome                                                     | CP013737 | 0.40    | 30/34 (88%)  |
| Xcc_17 | Perfectly matched to 31 <i>Xcc</i> genomes                                                                     |          | 1e-07   | 34/34 (100%) |
|        | <i>Sphingopyxis</i> sp. PAMC25046 chromosome, complete genome                                                  | CP039250 | 0.40    | 27/30 (90%)  |

| Spacer | Annotation                                                                                                     | Acc. No. | E-value | Identity (%) |
|--------|----------------------------------------------------------------------------------------------------------------|----------|---------|--------------|
|        | <i>Myxococcus macrosporus</i> DSM 14697 chromosome, complete genome                                            | CP022203 | 0.40    | 25/27 (93%)  |
|        | <i>Myxococcus macrosporus</i> strain HW-1, complete genome                                                     | CP002830 | 0.40    | 25/27 (93%)  |
| Xcc_16 | Perfectly matched to 31 <i>Xcc</i> genomes                                                                     |          | 1e-08   | 36/36 (100%) |
|        | <i>Xanthomonas citri</i> pv. <i>fuscans</i> CFBP 6988 chromosome                                               | CP026331 | 6e-05   | 32/34 (94%)  |
|        | <i>Xanthomonas citri</i> pv. <i>phaseoli</i> var. <i>fuscans</i> strain CFBP 6991 chromosome, complete genome  | CP021015 | 6e-05   | 32/34 (94%)  |
|        | <i>Xanthomonas citri</i> pv. <i>phaseoli</i> var. <i>fuscans</i> strain CFBP 6990 chromosome, complete genome  | CP020983 | 6e-05   | 32/34 (94%)  |
|        | <i>Xanthomonas citri</i> pv. <i>phaseoli</i> var. <i>fuscans</i> strain CFBP 6989 chromosome, complete genome  | CP020981 | 6e-05   | 32/34 (94%)  |
|        | <i>Xanthomonas citri</i> pv. <i>phaseoli</i> var. <i>fuscans</i> strain CFBP 6988R chromosome, complete genome | CP020979 | 6e-05   | 32/34 (94%)  |
|        | <i>Paracoccus</i> sp. BM15 chromosome, complete genome                                                         | CP025408 | 0.11    | 25/26 (96%)  |
|        | <i>Mesorhizobium</i> sp. M8A.F.Ca.ET.057.01.1.1 chromosome                                                     | CP034454 | 0.11    | 26/28 (93%)  |
|        | <i>Burkholderia thailandensis</i> strain FDAARGOS_242 chromosome 1, complete sequence                          | CP022217 | 0.11    | 26/28 (93%)  |
|        | <i>Burkholderia thailandensis</i> strain FDAARGOS_241 chromosome 1, complete sequence                          | CP022214 | 0.11    | 26/28 (93%)  |
|        | <i>Burkholderia thailandensis</i> strain FDAARGOS_238 chromosome 1, complete sequence                          | CP020392 | 0.11    | 26/28 (93%)  |
|        | <i>Burkholderia thailandensis</i> strain FDAARGOS_237 chromosome 1, complete sequence                          | CP020390 | 0.11    | 26/28 (93%)  |
|        | <i>Burkholderia thailandensis</i> strain 2002721643 chromosome 1, complete sequence                            | CP013411 | 0.11    | 26/28 (93%)  |
|        | <i>Burkholderia thailandensis</i> strain 2002721121 chromosome 1, complete sequence                            | CP013409 | 0.11    | 26/28 (93%)  |
|        | <i>Burkholderia thailandensis</i> strain MSMB59 chromosome 1, complete sequence                                | CP013407 | 0.11    | 26/28 (93%)  |
|        | <i>Burkholderia thailandensis</i> strain 2003015869 chromosome 1, complete sequence                            | CP013360 | 0.11    | 26/28 (93%)  |
|        | <i>Azospirillum thiophilum</i> strain BV-S chromosome 8, complete sequence                                     | CP012408 | 0.11    | 26/28 (93%)  |
|        | <i>Streptomyces leeuwenhoekii</i> genome assembly sleC34, chromosome                                           | LN831790 | 0.11    | 26/28 (93%)  |
|        | <i>Burkholderia thailandensis</i> 34 chromosome 1, complete sequence                                           | CP010017 | 0.11    | 26/28 (93%)  |
|        | <i>Burkholderia thailandensis</i> 2002721643 chromosome I, complete sequence                                   | CP009601 | 0.11    | 26/28 (93%)  |
|        | <i>Burkholderia thailandensis</i> strain 2003015869 chromosome 1, complete sequence                            | CP008914 | 0.11    | 26/28 (93%)  |
|        | <i>Streptomyces cyaneogriseus</i> subsp. <i>noncyanogenus</i> strain NMWT 1, complete genome                   | CP010849 | 0.11    | 26/28 (93%)  |
|        | <i>Burkholderia thailandensis</i> E254 chromosome 1, complete sequence                                         | CP004381 | 0.11    | 26/28 (93%)  |
|        | <i>Burkholderia thailandensis</i> MSMB59 chromosome 1, complete sequence                                       | CP004385 | 0.11    | 26/28 (93%)  |
|        | <i>Burkholderia thailandensis</i> E264 chromosome 1, complete sequence                                         | CP008785 | 0.11    | 26/28 (93%)  |
|        | <i>Burkholderia thailandensis</i> USAMRU Malaysia #20 chromosome 1, complete sequence                          | CP004383 | 0.11    | 26/28 (93%)  |
|        | <i>Burkholderia thailandensis</i> E444 chromosome 1,                                                           | CP004117 | 0.11    | 26/28 (93%)  |

| Spacer | Annotation                                                                         | Acc. No. | E-value | Identity (%) |
|--------|------------------------------------------------------------------------------------|----------|---------|--------------|
|        | complete sequence                                                                  |          |         |              |
|        | <i>Burkholderia thailandensis</i> 2002721723 chromosome 1, complete sequence       | CP004097 | 0.11    | 26/28 (93%)  |
|        | <i>Burkholderia thailandensis</i> H0587 chromosome 1, complete sequence            | CP004089 | 0.11    | 26/28 (93%)  |
|        | <i>Burkholderia thailandensis</i> E264 chromosome I, complete sequence             | CP000086 | 0.11    | 26/28 (93%)  |
|        | <i>Thermobispora bispora</i> DSM 43833, complete genome                            | CP001874 | 0.40    | 30/35 (86%)  |
|        | <i>Thioalkalivibrio versutus</i> strain D301, complete genome                      | CP011367 | 0.40    | 25/27 (93%)  |
|        | <i>Bordetella petrii</i> strain DSM 12804, complete genome                         | AM902716 | 0.40    | 25/27 (93%)  |
| Xcc_15 | Perfectly matched to 31 <i>Xcc</i> genomes                                         |          | 3e-09   | 37/37 (100%) |
| Xcc_14 | Perfectly matched to two <i>Xcc</i> genomes                                        |          | 1e-08   | 36/36 (100%) |
| Xcc_13 | Perfectly matched to 29 <i>Xcc</i> genomes                                         |          | 3e-08   | 35/35 (100%) |
|        | <i>Xanthomonas citri</i> subsp. <i>citri</i> strain UI7, complete genome           | CP008989 | 1e-06   | 34/35 (97%)  |
|        | <i>Xanthomonas citri</i> subsp. <i>citri</i> UI6, complete genome                  | CP008992 | 1e-06   | 34/35 (97%)  |
| Xcc_12 | Perfectly matched to 30 <i>Xcc</i> genomes                                         |          | 3e-08   | 35/35 (100%) |
| Xcc_11 | Perfectly matched to seven <i>Xcc</i> genomes                                      |          | 3e-08   | 35/35 (100%) |
|        | <i>Pseudomonas citronellolis</i> strain SJTE-3, complete genome                    | CP015878 | 0.11    | 26/28 (93%)  |
|        | <i>Pseudomonas aeruginosa</i> strain N15-01092, complete sequence                  | CP012901 | 0.11    | 26/28 (93%)  |
|        | <i>Pseudomonas aeruginosa</i> strain PSE305, genome                                | HG974234 | 0.11    | 26/28 (93%)  |
|        | <i>Achromobacter</i> phage phiAxp-2, complete genome                               | KT321316 | 0.40    | 30/35 (86%)  |
| Xcc_10 | Perfectly matched to eight <i>Xcc</i> genomes                                      |          | 1e-07   | 34/34 (100%) |
|        | <i>Herbaspirillum robiniae</i> strain AA6 chromosome, complete genome              | CP018845 | 0.40    | 27/30 (90%)  |
|        | Uncultured Mediterranean phage uvDeep-CGR2-AD3-C191, complete genome               | KT997870 | 0.40    | 28/32 (88%)  |
|        | <i>Ramlibacter tataouinensis</i> strain 5-10, complete genome                      | CP010951 | 0.40    | 22/22 (100%) |
| Xcc_9  | Perfectly matched to 30 <i>Xcc</i> genomes                                         |          | 1e-07   | 34/34 (100%) |
| Xcc_8  | Perfectly matched to eight <i>Xcc</i> genomes                                      |          | 1e-07   | 34/34 (100%) |
| Xcc_7  | Perfectly matched to 33 <i>Xcc</i> genomes                                         |          | 1e-07   | 34/34 (100%) |
|        | <i>Rhodococcus</i> sp. NJ-530 chromosome, complete genome                          | CP034152 | 0.11    | 26/28 (93%)  |
|        | <i>Rhodococcus</i> sp. djl-6-2 chromosome, complete genome                         | CP025959 | 0.11    | 26/28 (93%)  |
|        | <i>Xanthomonas citri</i> pv. <i>glycines</i> str. 12-2 chromosome, complete genome | CP015972 | 0.11    | 26/28 (93%)  |
|        | <i>Rhodococcus</i> sp. BH4, complete genome                                        | CP014941 | 0.11    | 26/28 (93%)  |
|        | <i>Rhodococcus</i> sp. YL-1, complete genome                                       | CP017299 | 0.11    | 26/28 (93%)  |
|        | <i>Rhodococcus</i> sp. 008, complete genome                                        | CP012749 | 0.11    | 26/28 (93%)  |
|        | <i>Alloactinosynnema</i> sp. L-07 genome assembly                                  | LN850107 | 0.40    | 24/25 (96%)  |
|        | <i>Alloactinosynnema</i> sp. L-07, chromosome : I                                  |          |         |              |
|        | <i>Pseudomonas putida</i> strain B4 chromosome, complete genome                    | CP022561 | 0.40    | 22/22 (100%) |
|        | <i>Pseudomonas putida</i> strain NCTC13186 genome assembly, chromosome: 1          | LR134299 | 0.40    | 22/22 (100%) |

| Spacer | Annotation                                                                                                     | Acc. No. | E-value | Identity (%) |
|--------|----------------------------------------------------------------------------------------------------------------|----------|---------|--------------|
|        | <i>Pseudomonas</i> sp. SWI36 chromosome, complete genome                                                       | CP026675 | 0.40    | 22/22 (100%) |
|        | <i>Pseudomonas</i> sp. XWY-1 chromosome, complete genome                                                       | CP026332 | 0.40    | 22/22 (100%) |
|        | <i>Pseudomonas putida</i> strain KT2440 genome assembly, chromosome: I                                         | LT799039 | 0.40    | 22/22 (100%) |
|        | <i>Pseudomonas putida</i> strain NIR genome assembly, chromosome: I                                            | LT707061 | 0.40    | 22/22 (100%) |
|        | <i>Pseudomonas putida</i> JB, complete genome                                                                  | CP016212 | 0.40    | 22/22 (100%) |
|        | <i>Pseudomonas putida</i> SJTE-1, complete genome                                                              | CP015876 | 0.40    | 22/22 (100%) |
|        | <i>Pseudomonas putida</i> KT2440 complete genome                                                               | AE015451 | 0.40    | 22/22 (100%) |
|        | <i>Pseudomonas putida</i> S12, complete genome                                                                 | CP009974 | 0.40    | 22/22 (100%) |
|        | <i>Nocardia nova</i> SH22a, complete genome                                                                    | CP006850 | 0.40    | 25/27 (93%)  |
|        | <i>Pseudomonas putida</i> DOT-T1E, complete genome                                                             | CP003734 | 0.40    | 22/22 (100%) |
|        | <i>Pseudomonas putida</i> ND6, complete genome                                                                 | CP003588 | 0.40    | 22/22 (100%) |
|        | <i>Pseudomonas putida</i> BIRD-1, complete genome                                                              | CP002290 | 0.40    | 22/22 (100%) |
| Xcc_6  | Perfectly matched to 32 <i>Xcc</i> genomes                                                                     |          | 1e-07   | 34/34 (100%) |
| Xcc_5  | Perfectly matched to 33 <i>Xcc</i> genomes                                                                     |          | 3e-08   | 35/35 (100%) |
| Xcc_4  | Perfectly matched to 33 <i>Xcc</i> genomes                                                                     |          | 1e-07   | 34/34 (100%) |
| Xcc_3  | Perfectly matched to 15 <i>Xcc</i> genomes                                                                     |          | 1e-08   | 36/36 (100%) |
|        | <i>Synechococcus</i> sp. SynAce01, complete genome                                                             | CP018091 | 0.11    | 23/23 (100%) |
|        | <i>Xanthomonas vasicola</i> pv. <i>vasculorum</i> strain Xv1601 chromosome, complete genome                    | CP025272 | 0.40    | 30/35 (86%)  |
|        | <i>Xanthomonas vasicola</i> strain NCPPB 1060 chromosome, complete genome                                      | CP034649 | 0.40    | 30/35 (86%)  |
|        | <i>Xanthomonas citri</i> pv. <i>vignicola</i> strain CFBP 7113, complete genome                                | CP022270 | 0.40    | 27/30 (90%)  |
|        | <i>Xanthomonas citri</i> pv. <i>phaseoli</i> var. <i>fuscans</i> strain CFBP 6994R chromosome, complete genome | CP020987 | 0.40    | 28/32 (88%)  |
|        | <i>Rhodopseudomonas palustris</i> BisB18, complete genome                                                      | CP000301 | 0.40    | 22/22 (100%) |
| Xcc_2  | Perfectly matched to 33 <i>Xcc</i> genomes                                                                     |          | 1e-07   | 34/34 (100%) |
|        | <i>Halobiforma lacisalsi</i> AJ5, complete genome                                                              | CP019285 | 0.11    | 26/28 (93%)  |
|        | <i>Streptomyces</i> sp. WAC 01529 chromosome, complete genome                                                  | CP029617 | 0.40    | 22/22 (100%) |
|        | Uncultured <i>Acidobacteria</i> bacterium DNA, fosmid clone: JFF010_C03                                        | AP011669 | 0.40    | 22/22 (100%) |
| Xcc_1  | Perfectly matched to 33 <i>Xcc</i> genomes                                                                     |          | 1e-08   | 36/36 (100%) |
|        | <i>Xanthomonas citri</i> pv. <i>vignicola</i> strain CFBP 7113, complete genome                                | CP022270 | 0.003   | 32/36 (89%)  |
|        | <i>Xanthomonas citri</i> pv. <i>fuscans</i> CFBP 6988 chromosome                                               | CP026331 | 0.11    | 31/36 (86%)  |
|        | <i>Xanthomonas citri</i> pv. <i>phaseoli</i> var. <i>fuscans</i> strain CFBP 6991 chromosome, complete genome  | CP021015 | 0.11    | 31/36 (86%)  |
|        | <i>Xanthomonas citri</i> pv. <i>phaseoli</i> var. <i>fuscans</i> strain CFBP 6990 chromosome, complete genome  | CP020983 | 0.11    | 31/36 (86%)  |
|        | <i>Xanthomonas citri</i> pv. <i>phaseoli</i> var. <i>fuscans</i> strain CFBP 6989 chromosome, complete genome  | CP020981 | 0.11    | 31/36 (86%)  |
|        | <i>Xanthomonas citri</i> pv. <i>phaseoli</i> var. <i>fuscans</i> strain CFBP 6988R chromosome, complete genome | CP020979 | 0.11    | 31/36 (86%)  |
|        | <i>Ruminococcus champanellensis</i> type strain 18P13T draft genome                                            | FP929052 | 0.11    | 23/23 (100%) |

Database at <http://www.ncbi.nlm.nih.gov> queried on June 12, 2019. Yellow cells indicate identical spacers in completely sequenced strains of *X. citri* pv. *citri*. Orange cells indicate spacers with single-nucleotide polymorphisms in completely sequenced strains of *X. citri* pv. *citri*. Green cells indicate bacteriophage-related sequences. All hits that do not fit the stringent search criteria (E-value < 0.1, at least 90% coverage of the query sequence) with E-values < 1 are given in red. Only hits in non-eukaryotic organisms are listed.
