# Supplementary material for: CRISPR elements provide a new framework for the genealogy of the citrus canker pathogen Xanthomonas citri pv. citri
Source: PubMed Central journal article supplement (PMC6889575; doi:10.1186/s12864-019-6267-z), 2019-12-02
Supplement: 12864_2019_6267_MOESM8_ESM.pdf [file 12864_2019_6267_MOESM8_ESM.pdf]

**Cas3 (effector nuclease-helicase)**

LG97 ATGGACTTCTTTGCGCATTCGACCAAGCGGCAGGATCGCAGCGATTGGCAACGGCTGGCC  
NCPPB3612 ATGGACTTCTTTGCGCATTCGACCAAGCGGCAGGATCGCAGCGATTGGCAACGGCTGGCC  
C40 ATGGACTTCTTTGCGCATTCGACCAAGCGGCAGGATCGCAGCGATTGGCAACGGCTGGCC  
CFBP2852 ATGGACTTCTTTGCGCATTCGACCAAGCGGCAGGATCGCAGCGATTGGCAACGGCTGGCC  
CFBP2911 ATGGACTTCTTTGCGCATTCGACCAAGCGGCAGGATCGCAGCGATTGGCAACGGCTGGCC  
FDC217 ATGGACTTCTTTGCGCATTCGACCAAGCGGCAGGATCGCAGCGATTGGCAACGGCTGGCC  
FDC1083 ATGGACTTCTTTGCGCATTCGACCAAGCGGCAGGATCGCAGCGATTGGCAACGGCTGGCC  
JF90-8 ATGGACTTCTTTGCGCATTCGACCAAGCGGCAGGATCGCAGCGATTGGCAACGGCTGGCC  
JJ10-1 ATGGACTTCTTTGCGCATTCGACCAAGCGGCAGGATCGCAGCGATTGGCAACGGCTGGCC  
JJ238-10 ATGGACTTCTTTGCGCATTCGACCAAGCGGCAGGATCGCAGCGATTGGCAACGGCTGGCC  
JJ238-24 ATGGACTTCTTTGCGCATTCGACCAAGCGGCAGGATCGCAGCGATTGGCAACGGCTGGCC  
JK2-10 ATGGACTTCTTTGCGCATTCGACCAAGCGGCAGGATCGCAGCGATTGGCAACGGCTGGCC  
JK4-1 ATGGACTTCTTTGCGCATTCGACCAAGCGGCAGGATCGCAGCGATTGGCAACGGCTGGCC  
JK143-11 ATGGACTTCTTTGCGCATTCGACCAAGCGGCAGGATCGCAGCGATTGGCAACGGCTGGCC  
JS581 ATGGACTTCTTTGCGCATTCGACCAAGCGGCAGGATCGCAGCGATTGGCAACGGCTGGCC  
JS584 ATGGACTTCTTTGCGCATTCGACCAAGCGGCAGGATCGCAGCGATTGGCAACGGCTGGCC  
JW160-1 ATGGACTTCTTTGCGCATTCGACCAAGCGGCAGGATCGCAGCGATTGGCAACGGCTGGCC  
LB100-1 ATGGACTTCTTTGCGCATTCGACCAAGCGGCAGGATCGCAGCGATTGGCAACGGCTGGCC  
LC80 ATGGACTTCTTTGCGCATTCGACCAAGCGGCAGGATCGCAGCGATTGGCAACGGCTGGCC  
LD71a ATGGACTTCTTTGCGCATTCGACCAAGCGGCAGGATCGCAGCGATTGGCAACGGCTGGCC  
LE20-1 ATGGACTTCTTTGCGCATTCGACCAAGCGGCAGGATCGCAGCGATTGGCAACGGCTGGCC  
LG115 ATGGACTTCTTTGCGCATTCGACCAAGCGGCAGGATCGCAGCGATTGGCAACGGCTGGCC  
LG117 ATGGACTTCTTTGCGCATTCGACCAAGCGGCAGGATCGCAGCGATTGGCAACGGCTGGCC  
LH37-1 ATGGACTTCTTTGCGCATTCGACCAAGCGGCAGGATCGCAGCGATTGGCAACGGCTGGCC  
LMG9322 ATGGACTTCTTTGCGCATTCGACCAAGCGGCAGGATCGCAGCGATTGGCAACGGCTGGCC  
NCPPB3562 ATGGACTTCTTTGCGCATTCGACCAAGCGGCAGGATCGCAGCGATTGGCAACGGCTGGCC  
NCPPB3607 ATGGACTTCTTTGCGCATTCGACCAAGCGGCAGGATCGCAGCGATTGGCAACGGCTGGCC  
NCPPB3608 ATGGACTTCTTTGCGCATTCGACCAAGCGGCAGGATCGCAGCGATTGGCAACGGCTGGCC  
X2003-3218 ATGGACTTCTTTGCGCATTCGACCAAGCGGCAGGATCGCAGCGATTGGCAACGGCTGGCC  
JF90-2 ATGGACTTCTTTGCGCATTCGACCAAGCGGCAGGATCGCAGCGATTGGCAACGGCTGGCC  
JM35 ATGGACTTCTTTGCGCATTCGACCAAGCGGCAGGATCGCAGCGATTGGCAACGGCTGGCC  
\*\*\*\*\*

LG97 GATCACCTACTCGCCGTCGGCGAACGCGCCGCGCAGGAATGCCGCACCGTTTGGAGGCCAA  
NCPPB3612 GATCACCTACTCGCCGTCGGCGAACGCGCCGCGCAGGAATGCCGCACCGTTTGGAGGCCAA  
C40 GATCACCTACTCGCCGTCGGCGAACGCGCCGCGCAGGAATGCCGCACCGTTTGGAGGCCAA  
CFBP2852 GATCACCTACTCGCCGTCGGCGAACGCGCCGCGCAGGAATGCCGCACCGTTTGGAGGCCAA  
CFBP2911 GATCACCTACTCGCCGTCGGCGAACGCGCCGCGCAGGAATGCCGCACCGTTTGGAGGCCAA  
FDC217 GATCACCTACTCGCCGTCGGCGAACGCGCCGCGCAGGAATGCCGCACCGTTTGGAGGCCAA  
FDC1083 GATCACCTACTCGCCGTCGGCGAACGCGCCGCGCAGGAATGCCGCACCGTTTGGAGGCCAA  
JF90-8 GATCACCTACTCGCCGTCGGCGAACGCGCCGCGCAGGAATGCCGCACCGTTTGGAGGCCAA  
JJ10-1 GATCACCTACTCGCCGTCGGCGAACGCGCCGCGCAGGAATGCCGCACCGTTTGGAGGCCAA  
JJ238-10 GATCACCTACTCGCCGTCGGCGAACGCGCCGCGCAGGAATGCCGCACCGTTTGGAGGCCAA  
JJ238-24 GATCACCTACTCGCCGTCGGCGAACGCGCCGCGCAGGAATGCCGCACCGTTTGGAGGCCAA  
JK2-10 GATCACCTACTCGCCGTCGGCGAACGCGCCGCGCAGGAATGCCGCACCGTTTGGAGGCCAA  
JK4-1 GATCACCTACTCGCCGTCGGCGAACGCGCCGCGCAGGAATGCCGCACCGTTTGGAGGCCAA  
JK143-11 GATCACCTACTCGCCGTCGGCGAACGCGCCGCGCAGGAATGCCGCACCGTTTGGAGGCCAA  
JS581 GATCACCTACTCGCCGTCGGCGAACGCGCCGCGCAGGAATGCCGCACCGTTTGGAGGCCAA  
JS584 GATCACCTACTCGCCGTCGGCGAACGCGCCGCGCAGGAATGCCGCACCGTTTGGAGGCCAA  
JW160-1 GATCACCTACTCGCCGTCGGCGAACGCGCCGCGCAGGAATGCCGCACCGTTTGGAGGCCAA  
LB100-1 GATCACCTACTCGCCGTCGGCGAACGCGCCGCGCAGGAATGCCGCACCGTTTGGAGGCCAA  
LC80 GATCACCTACTCGCCGTCGGCGAACGCGCCGCGCAGGAATGCCGCACCGTTTGGAGGCCAA  
LD71a GATCACCTACTCGCCGTCGGCGAACGCGCCGCGCAGGAATGCCGCACCGTTTGGAGGCCAA  
LE20-1 GATCACCTACTCGCCGTCGGCGAACGCGCCGCGCAGGAATGCCGCACCGTTTGGAGGCCAA  
LG115 GATCACCTACTCGCCGTCGGCGAACGCGCCGCGCAGGAATGCCGCACCGTTTGGAGGCCAA  
LG117 GATCACCTACTCGCCGTCGGCGAACGCGCCGCGCAGGAATGCCGCACCGTTTGGAGGCCAA  
LH37-1 GATCACCTACTCGCCGTCGGCGAACGCGCCGCGCAGGAATGCCGCACCGTTTGGAGGCCAA  
LMG9322 GATCACCTACTCGCCGTCGGCGAACGCGCCGCGCAGGAATGCCGCACCGTTTGGAGGCCAA  
NCPPB3562 GATCACCTACTCGCCGTCGGCGAACGCGCCGCGCAGGAATGCCGCACCGTTTGGAGGCCAA  
NCPPB3607 GATCACCTACTCGCCGTCGGCGAACGCGCCGCGCAGGAATGCCGCACCGTTTGGAGGCCAA  
NCPPB3608 GATCACCTACTCGCCGTCGGCGAACGCGCCGCGCAGGAATGCCGCACCGTTTGGAGGCCAA  
X2003-3218 GATCACCTACTCGCCGTCGGCGAACGCGCCGCGCAGGAATGCCGCACCGTTTGGAGGCCAA  
JF90-2 GATCACCTACTCGCCGTCGGCGAACGCGCCGCGCAGGAATGCCGCACCGTTTGGAGGCCAA  
JM35 GATCACCTACTCGCCGTCGGCGAACGCGCCGCGCAGGAATGCCGCACCGTTTGGAGGCCAA  
\*\*\*\*\*







LG97 CGTCGCCCTTTTCAGCTCACGGTCCTGACGCGGATGATCTTCTCCTGCCTGGTCGATTCC  
NCPPB3612 CGTCGCCCTTTTCAGCTCACGGTCCTGACGCGGATGATCTTCTCCTGCCTGGTCGATTCC  
C40 CGTCGCCCTTTTCAGCTCACGGTCCTGACGCGGATGATCTTCTCCTGCCTGGTCGATTCC  
CFBP2852 CGTCGCCCTTTTCAGCTCACGGTCCTGACGCGGATGATCTTCTCCTGCCTGGTCGATTCC  
CFBP2911 CGTCGCCCTTTTCAGCTCACGGTCCTGACGCGGATGATCTTCTCCTGCCTGGTCGATTCC  
FDC217 CGTCGCCCTTTTCAGCTCACGGTCCTGACGCGGATGATCTTCTCCTGCCTGGTCGATTCC  
FDC1083 CGTCGCCCTTTTCAGCTCACGGTCCTGACGCGGATGATCTTCTCCTGCCTGGTCGATTCC  
JF90-8 CGTCGCCCTTTTCAGCTCACGGTCCTGACGCGGATGATCTTCTCCTGCCTGGTCGATTCC  
JJ10-1 CGTCGCCCTTTTCAGCTCACGGTCCTGACGCGGATGATCTTCTCCTGCCTGGTCGATTCC  
JJ238-10 CGTCGCCCTTTTCAGCTCACGGTCCTGACGCGGATGATCTTCTCCTGCCTGGTCGATTCC  
JJ238-24 CGTCGCCCTTTTCAGCTCACGGTCCTGACGCGGATGATCTTCTCCTGCCTGGTCGATTCC  
JK2-10 CGTCGCCCTTTTCAGCTCACGGTCCTGACGCGGATGATCTTCTCCTGCCTGGTCGATTCC  
JK4-1 CGTCGCCCTTTTCAGCTCACGGTCCTGACGCGGATGATCTTCTCCTGCCTGGTCGATTCC  
JK143-11 CGTCGCCCTTTTCAGCTCACGGTCCTGACGCGGATGATCTTCTCCTGCCTGGTCGATTCC  
JS581 CGTCGCCCTTTTCAGCTCACGGTCCTGACGCGGATGATCTTCTCCTGCCTGGTCGATTCC  
JS584 CGTCGCCCTTTTCAGCTCACGGTCCTGACGCGGATGATCTTCTCCTGCCTGGTCGATTCC  
JW160-1 CGTCGCCCTTTTCAGCTCACGGTCCTGACGCGGATGATCTTCTCCTGCCTGGTCGATTCC  
LB100-1 CGTCGCCCTTTTCAGCTCACGGTCCTGACGCGGATGATCTTCTCCTGCCTGGTCGATTCC  
LC80 CGTCGCCCTTTTCAGCTCACGGTCCTGACGCGGATGATCTTCTCCTGCCTGGTCGATTCC  
LD71a CGTCGCCCTTTTCAGCTCACGGTCCTGACGCGGATGATCTTCTCCTGCCTGGTCGATTCC  
LE20-1 CGTCGCCCTTTTCAGCTCACGGTCCTGACGCGGATGATCTTCTCCTGCCTGGTCGATTCC  
LG115 CGTCGCCCTTTTCAGCTCACGGTCCTGACGCGGATGATCTTCTCCTGCCTGGTCGATTCC  
LG117 CGTCGCCCTTTTCAGCTCACGGTCCTGACGCGGATGATCTTCTCCTGCCTGGTCGATTCC  
LH37-1 CGTCGCCCTTTTCAGCTCACGGTCCTGACGCGGATGATCTTCTCCTGCCTGGTCGATTCC  
LMG9322 CGTCGCCCTTTTCAGCTCACGGTCCTGACGCGGATGATCTTCTCCTGCCTGGTCGATTCC  
NCPPB3562 CGTCGCCCTTTTCAGCTCACGGTCCTGACGCGGATGATCTTCTCCTGCCTGGTCGATTCC  
NCPPB3607 CGTCGCCCTTTTCAGCTCACGGTCCTGACGCGGATGATCTTCTCCTGCCTGGTCGATTCC  
NCPPB3608 CGTCGCCCTTTTCAGCTCACGGTCCTGACGCGGATGATCTTCTCCTGCCTGGTCGATTCC  
X2003-3218 CGTCGCCCTTTTCAGCTCACGGTCCTGACGCGGATGATCTTCTCCTGCCTGGTCGATTCC  
JF90-2 CGTCGCCCTTTTCAGCTCACGGTCCTGACGCGGATGATCTTCTCCTGCCTGGTCGATTCC  
JM35 CGTCGCCCTTTTCAGCTCACGGTCCTGACGCGGATGATCTTCTCCTGCCTGGTCGATTCC  
\*\*\*\*\*

LG97 GACTTCACCGAGACCGACGATTTCTATCGCCGCTGGAAGGGCGCCAGTCGCGTGCGGAG  
NCPPB3612 GACTTCACCGAGACCGACGATTTCTATCGCCGCTGGAAGGGCGCCAGTCGCGTGCGGAG  
C40 GACTTCACCGAGACCGACGATTTCTATCGCCGCTGGAAGGGCGCCAGTCGCGTGCGGAG  
CFBP2852 GACTTCACCGAGACCGACGATTTCTATCGCCGCTGGAAGGGCGCCAGTCGCGTGCGGAG  
CFBP2911 GACTTCACCGAGACCGACGATTTCTATCGCCGCTGGAAGGGCGCCAGTCGCGTGCGGAG  
FDC217 GACTTCACCGAGACCGACGATTTCTATCGCCGCTGGAAGGGCGCCAGTCGCGTGCGGAG  
FDC1083 GACTTCACCGAGACCGACGATTTCTATCGCCGCTGGAAGGGCGCCAGTCGCGTGCGGAG  
JF90-8 GACTTCACCGAGACCGACGATTTCTATCGCCGCTGGAAGGGCGCCAGTCGCGTGCGGAG  
JJ10-1 GACTTCACCGAGACCGACGATTTCTATCGCCGCTGGAAGGGCGCCAGTCGCGTGCGGAG  
JJ238-10 GACTTCACCGAGACCGACGATTTCTATCGCCGCTGGAAGGGCGCCAGTCGCGTGCGGAG  
JJ238-24 GACTTCACCGAGACCGACGATTTCTATCGCCGCTGGAAGGGCGCCAGTCGCGTGCGGAG  
JK2-10 GACTTCACCGAGACCGACGATTTCTATCGCCGCTGGAAGGGCGCCAGTCGCGTGCGGAG  
JK4-1 GACTTCACCGAGACCGACGATTTCTATCGCCGCTGGAAGGGCGCCAGTCGCGTGCGGAG  
JK143-11 GACTTCACCGAGACCGACGATTTCTATCGCCGCTGGAAGGGCGCCAGTCGCGTGCGGAG  
JS581 GACTTCACCGAGACCGACGATTTCTATCGCCGCTGGAAGGGCGCCAGTCGCGTGCGGAG  
JS584 GACTTCACCGAGACCGACGATTTCTATCGCCGCTGGAAGGGCGCCAGTCGCGTGCGGAG  
JW160-1 GACTTCACCGAGACCGACGATTTCTATCGCCGCTGGAAGGGCGCCAGTCGCGTGCGGAG  
LB100-1 GACTTCACCGAGACCGACGATTTCTATCGCCGCTGGAAGGGCGCCAGTCGCGTGCGGAG  
LC80 GACTTCACCGAGACCGACGATTTCTATCGCCGCTGGAAGGGCGCCAGTCGCGTGCGGAG  
LD71a GACTTCACCGAGACCGACGATTTCTATCGCCGCTGGAAGGGCGCCAGTCGCGTGCGGAG  
LE20-1 GACTTCACCGAGACCGACGATTTCTATCGCCGCTGGAAGGGCGCCAGTCGCGTGCGGAG  
LG115 GACTTCACCGAGACCGACGATTTCTATCGCCGCTGGAAGGGCGCCAGTCGCGTGCGGAG  
LG117 GACTTCACCGAGACCGACGATTTCTATCGCCGCTGGAAGGGCGCCAGTCGCGTGCGGAG  
LH37-1 GACTTCACCGAGACCGACGATTTCTATCGCCGCTGGAAGGGCGCCAGTCGCGTGCGGAG  
LMG9322 GACTTCACCGAGACCGACGATTTCTATCGCCGCTGGAAGGGCGCCAGTCGCGTGCGGAG  
NCPPB3562 GACTTCACCGAGACCGACGATTTCTATCGCCGCTGGAAGGGCGCCAGTCGCGTGCGGAG  
NCPPB3607 GACTTCACCGAGACCGACGATTTCTATCGCCGCTGGAAGGGCGCCAGTCGCGTGCGGAG  
NCPPB3608 GACTTCACCGAGACCGACGATTTCTATCGCCGCTGGAAGGGCGCCAGTCGCGTGCGGAG  
X2003-3218 GACTTCACCGAGACCGACGATTTCTATCGCCGCTGGAAGGGCGCCAGTCGCGTGCGGAG  
JF90-2 GACTTCACCGAGACCGACGATTTCTATCGCCGCTGGAAGGGCGCCAGTCGCGTGCGGAG  
JM35 GACTTCACCGAGACCGACGATTTCTATCGCCGCTGGAAGGGCGCCAGTCGCGTGCGGAG  
\*\*\*\*\*

LG97 GACACCGGCACGCGTCCGGCCCTGCCAGAATTACGGCAATGCCTTGATGCGCACCTGTCC  
NCPPB3612 GACACCGGCACGCGTCCGGCCCTGCCAGAATTACGGCAATGCCTTGATGCGCACCTGTCC  
C40 GACACCGGCACGCGTCCGGCCCTGCCAGAATTACGGCAATGCCTTGATGCGCACCTGTCC  
CFBP2852 GACACCGGCACGCGTCCGGCCCTGCCAGAATTACGGCAATGCCTTGATGCGCACCTGTCC  
CFBP2911 GACACCGGCACGCGTCCGGCCCTGCCAGAATTACGGCAATGCCTTGATGCGCACCTGTCC  
FDC217 GACACCGGCACGCGTCCGGCCCTGCCAGAATTACGGCAATGCCTTGATGCGCACCTGTCC  
FDC1083 GACACCGGCACGCGTCCGGCCCTGCCAGAATTACGGCAATGCCTTGATGCGCACCTGTCC  
JF90-8 GACACCGGCACGCGTCCGGCCCTGCCAGAATTACGGCAATGCCTTGATGCGCACCTGTCC  
JJ10-1 GACACCGGCACGCGTCCGGCCCTGCCAGAATTACGGCAATGCCTTGATGCGCACCTGTCC  
JJ238-10 GACACCGGCACGCGTCCGGCCCTGCCAGAATTACGGCAATGCCTTGATGCGCACCTGTCC  
JJ238-24 GACACCGGCACGCGTCCGGCCCTGCCAGAATTACGGCAATGCCTTGATGCGCACCTGTCC  
JK2-10 GACACCGGCACGCGTCCGGCCCTGCCAGAATTACGGCAATGCCTTGATGCGCACCTGTCC  
JK4-1 GACACCGGCACGCGTCCGGCCCTGCCAGAATTACGGCAATGCCTTGATGCGCACCTGTCC  
JK143-11 GACACCGGCACGCGTCCGGCCCTGCCAGAATTACGGCAATGCCTTGATGCGCACCTGTCC  
JS581 GACACCGGCACGCGTCCGGCCCTGCCAGAATTACGGCAATGCCTTGATGCGCACCTGTCC  
JS584 GACACCGGCACGCGTCCGGCCCTGCCAGAATTACGGCAATGCCTTGATGCGCACCTGTCC  
JW160-1 GACACCGGCACGCGTCCGGCCCTGCCAGAATTACGGCAATGCCTTGATGCGCACCTGTCC  
LB100-1 GACACCGGCACGCGTCCGGCCCTGCCAGAATTACGGCAATGCCTTGATGCGCACCTGTCC  
LC80 GACACCGGCACGCGTCCGGCCCTGCCAGAATTACGGCAATGCCTTGATGCGCACCTGTCC  
LD71a GACACCGGCACGCGTCCGGCCCTGCCAGAATTACGGCAATGCCTTGATGCGCACCTGTCC  
LE20-1 GACACCGGCACGCGTCCGGCCCTGCCAGAATTACGGCAATGCCTTGATGCGCACCTGTCC  
LG115 GACACCGGCACGCGTCCGGCCCTGCCAGAATTACGGCAATGCCTTGATGCGCACCTGTCC  
LG117 GACACCGGCACGCGTCCGGCCCTGCCAGAATTACGGCAATGCCTTGATGCGCACCTGTCC  
LH37-1 GACACCGGCACGCGTCCGGCCCTGCCAGAATTACGGCAATGCCTTGATGCGCACCTGTCC  
LMG9322 GACACCGGCACGCGTCCGGCCCTGCCAGAATTACGGCAATGCCTTGATGCGCACCTGTCC  
NCPPB3562 GACACCGGCACGCGTCCGGCCCTGCCAGAATTACGGCAATGCCTTGATGCGCACCTGTCC  
NCPPB3607 GACACCGGCACGCGTCCGGCCCTGCCAGAATTACGGCAATGCCTTGATGCGCACCTGTCC  
NCPPB3608 GACACCGGCACGCGTCCGGCCCTGCCAGAATTACGGCAATGCCTTGATGCGCACCTGTCC  
X2003-3218 GACACCGGCACGCGTCCGGCCCTGCCAGAATTACGGCAATGCCTTGATGCGCACCTGTCC  
JF90-2 GACACCGGCACGCGTCCGGCCCTGCCAGAATTACGGCAATGCCTTGATGCGCACCTGTCC  
JM35 GACACCGGCACGCGTCCGGCCCTGCCAGAATTACGGCAATGCCTTGATGCGCACCTGTCC  
\*\*\*\*\*

LG97 ACGTTGCCACCGAGGGCGGCATCAACCCCTTGCGCGCGCAGATCCTGAGCGAAGTTCGT  
NCPPB3612 ACGTTGCCACCGAGGGCGGCATCAACCCCTTGCGCGCGCAGATCCTGAGCGAAGTTCGT  
C40 ACGTTGCCACCGAGGGCGGCATCAACCCCTTGCGCGCGCAGATCCTGAGCGAAGTTCGT  
CFBP2852 ACGTTGCCACCGAGGGCGGCATCAACCCCTTGCGCGCGCAGATCCTGAGCGAAGTTCGT  
CFBP2911 ACGTTGCCACCGAGGGCGGCATCAACCCCTTGCGCGCGCAGATCCTGAGCGAAGTTCGT  
FDC217 ACGTTGCCACCGAGGGCGGCATCAACCCCTTGCGCGCGCAGATCCTGAGCGAAGTTCGT  
FDC1083 ACGTTGCCACCGAGGGCGGCATCAACCCCTTGCGCGCGCAGATCCTGAGCGAAGTTCGT  
JF90-8 ACGTTGCCACCGAGGGCGGCATCAACCCCTTGCGCGCGCAGATCCTGAGCGAAGTTCGT  
JJ10-1 ACGTTGCCACCGAGGGCGGCATCAACCCCTTGCGCGCGCAGATCCTGAGCGAAGTTCGT  
JJ238-10 ACGTTGCCACCGAGGGCGGCATCAACCCCTTGCGCGCGCAGATCCTGAGCGAAGTTCGT  
JJ238-24 ACGTTGCCACCGAGGGCGGCATCAACCCCTTGCGCGCGCAGATCCTGAGCGAAGTTCGT  
JK2-10 ACGTTGCCACCGAGGGCGGCATCAACCCCTTGCGCGCGCAGATCCTGAGCGAAGTTCGT  
JK4-1 ACGTTGCCACCGAGGGCGGCATCAACCCCTTGCGCGCGCAGATCCTGAGCGAAGTTCGT  
JK143-11 ACGTTGCCACCGAGGGCGGCATCAACCCCTTGCGCGCGCAGATCCTGAGCGAAGTTCGT  
JS581 ACGTTGCCACCGAGGGCGGCATCAACCCCTTGCGCGCGCAGATCCTGAGCGAAGTTCGT  
JS584 ACGTTGCCACCGAGGGCGGCATCAACCCCTTGCGCGCGCAGATCCTGAGCGAAGTTCGT  
JW160-1 ACGTTGCCACCGAGGGCGGCATCAACCCCTTGCGCGCGCAGATCCTGAGCGAAGTTCGT  
LB100-1 ACGTTGCCACCGAGGGCGGCATCAACCCCTTGCGCGCGCAGATCCTGAGCGAAGTTCGT  
LC80 ACGTTGCCACCGAGGGCGGCATCAACCCCTTGCGCGCGCAGATCCTGAGCGAAGTTCGT  
LD71a ACGTTGCCACCGAGGGCGGCATCAACCCCTTGCGCGCGCAGATCCTGAGCGAAGTTCGT  
LE20-1 ACGTTGCCACCGAGGGCGGCATCAACCCCTTGCGCGCGCAGATCCTGAGCGAAGTTCGT  
LG115 ACGTTGCCACCGAGGGCGGCATCAACCCCTTGCGCGCGCAGATCCTGAGCGAAGTTCGT  
LG117 ACGTTGCCACCGAGGGCGGCATCAACCCCTTGCGCGCGCAGATCCTGAGCGAAGTTCGT  
LH37-1 ACGTTGCCACCGAGGGCGGCATCAACCCCTTGCGCGCGCAGATCCTGAGCGAAGTTCGT  
LMG9322 ACGTTGCCACCGAGGGCGGCATCAACCCCTTGCGCGCGCAGATCCTGAGCGAAGTTCGT  
NCPPB3562 ACGTTGCCACCGAGGGCGGCATCAACCCCTTGCGCGCGCAGATCCTGAGCGAAGTTCGT  
NCPPB3607 ACGTTGCCACCGAGGGCGGCATCAACCCCTTGCGCGCGCAGATCCTGAGCGAAGTTCGT  
NCPPB3608 ACGTTGCCACCGAGGGCGGCATCAACCCCTTGCGCGCGCAGATCCTGAGCGAAGTTCGT  
X2003-3218 ACGTTGCCACCGAGGGCGGCATCAACCCCTTGCGCGCGCAGATCCTGAGCGAAGTTCGT  
JF90-2 ACGTTGCCACCGAGGGCGGCATCAACCCCTTGCGCGCGCAGATCCTGAGCGAAGTTCGT  
JM35 ACGTTGCCACCGAGGGCGGCATCAACCCCTTGCGCGCGCAGATCCTGAGCGAAGTTCGT  
\*\*\*\*\*





LG97 ATCTACGTGATTCCGTTACCAGCATCGTCGAACAGACCGTACAGGTGTTTCGGCACGCA  
NCPPB3612 ATCTACGTGATTCCGTTACCAGCATCGTCGAACAGACCGTACAGGTGTTTCGGCACGCA  
C40 ATCTACGTGATTCCGTTACCAGCATCGTCGAACAGACCGTACAGGTGTTTCGGCACGCA  
CFBP2852 ATCTACGTGATTCCGTTACCAGCATCGTCGAACAGACCGTACAGGTGTTTCGGCACGCA  
CFBP2911 ATCTACGTGATTCCGTTACCAGCATCGTCGAACAGACCGTACAGGTGTTTCGGCACGCA  
FDC217 ATCTACGTGATTCCGTTACCAGCATCGTCGAACAGACCGTACAGGTGTTTCGGCACGCA  
FDC1083 ATCTACGTGATTCCGTTACCAGCATCGTCGAACAGACCGTACAGGTGTTTCGGCACGCA  
JF90-8 ATCTACGTGATTCCGTTACCAGCATCGTCGAACAGACCGTACAGGTGTTTCGGCACGCA  
JJ10-1 ATCTACGTGATTCCGTTACCAGCATCGTCGAACAGACCGTACAGGTGTTTCGGCACGCA  
JJ238-10 ATCTACGTGATTCCGTTACCAGCATCGTCGAACAGACCGTACAGGTGTTTCGGCACGCA  
JJ238-24 ATCTACGTGATTCCGTTACCAGCATCGTCGAACAGACCGTACAGGTGTTTCGGCACGCA  
JK2-10 ATCTACGTGATTCCGTTACCAGCATCGTCGAACAGACCGTACAGGTGTTTCGGCACGCA  
JK4-1 ATCTACGTGATTCCGTTACCAGCATCGTCGAACAGACCGTACAGGTGTTTCGGCACGCA  
JK143-11 ATCTACGTGATTCCGTTACCAGCATCGTCGAACAGACCGTACAGGTGTTTCGGCACGCA  
JS581 ATCTACGTGATTCCGTTACCAGCATCGTCGAACAGACCGTACAGGTGTTTCGGCACGCA  
JS584 ATCTACGTGATTCCGTTACCAGCATCGTCGAACAGACCGTACAGGTGTTTCGGCACGCA  
JW160-1 ATCTACGTGATTCCGTTACCAGCATCGTCGAACAGACCGTACAGGTGTTTCGGCACGCA  
LB100-1 ATCTACGTGATTCCGTTACCAGCATCGTCGAACAGACCGTACAGGTGTTTCGGCACGCA  
LC80 ATCTACGTGATTCCGTTACCAGCATCGTCGAACAGACCGTACAGGTGTTTCGGCACGCA  
LD71a ATCTACGTGATTCCGTTACCAGCATCGTCGAACAGACCGTACAGGTGTTTCGGCACGCA  
LE20-1 ATCTACGTGATTCCGTTACCAGCATCGTCGAACAGACCGTACAGGTGTTTCGGCACGCA  
LG115 ATCTACGTGATTCCGTTACCAGCATCGTCGAACAGACCGTACAGGTGTTTCGGCACGCA  
LG117 ATCTACGTGATTCCGTTACCAGCATCGTCGAACAGACCGTACAGGTGTTTCGGCACGCA  
LH37-1 ATCTACGTGATTCCGTTACCAGCATCGTCGAACAGACCGTACAGGTGTTTCGGCACGCA  
LMG9322 ATCTACGTGATTCCGTTACCAGCATCGTCGAACAGACCGTACAGGTGTTTCGGCACGCA  
NCPPB3562 ATCTACGTGATTCCGTTACCAGCATCGTCGAACAGACCGTACAGGTGTTTCGGCACGCA  
NCPPB3607 ATCTACGTGATTCCGTTACCAGCATCGTCGAACAGACCGTACAGGTGTTTCGGCACGCA  
NCPPB3608 ATCTACGTGATTCCGTTACCAGCATCGTCGAACAGACCGTACAGGTGTTTCGGCACGCA  
X2003-3218 ATCTACGTGATTCCGTTACCAGCATCGTCGAACAGACCGTACAGGTGTTTCGGCACGCA  
JF90-2 ATCTACGTGATTCCGTTACCAGCATCGTCGAACAGACCGTACAGGTGTTTCGGCACGCA  
JM35 ATCTACGTGATTCCGTTACCAGCATCGTCGAACAGACCGTACAGGTGTTTCGGCACGCA  
\*\*\*\*\*

LG97 TTGGGCGTGCAGGAGCGCGACGACATCGTGCTGGAGCACCACAGCGCCTTCTTCGACGAT  
NCPPB3612 TTGGGCGTGCAGGAGCGCGACGACATCGTGCTGGAGCACCACAGCGCCTTCTTCGACGAT  
C40 TTGGGCGTGCAGGAGCGCGACGACATCGTGCTGGAGCACCACAGCGCCTTCTTCGACGAT  
CFBP2852 TTGGGCGTGCAGGAGCGCGACGACATCGTGCTGGAGCACCACAGCGCCTTCTTCGACGAT  
CFBP2911 TTGGGCGTGCAGGAGCGCGACGACATCGTGCTGGAGCACCACAGCGCCTTCTTCGACGAT  
FDC217 TTGGGCGTGCAGGAGCGCGACGACATCGTGCTGGAGCACCACAGCGCCTTCTTCGACGAT  
FDC1083 TTGGGCGTGCAGGAGCGCGACGACATCGTGCTGGAGCACCACAGCGCCTTCTTCGACGAT  
JF90-8 TTGGGCGTGCAGGAGCGCGACGACATCGTGCTGGAGCACCACAGCGCCTTCTTCGACGAT  
JJ10-1 TTGGGCGTGCAGGAGCGCGACGACATCGTGCTGGAGCACCACAGCGCCTTCTTCGACGAT  
JJ238-10 TTGGGCGTGCAGGAGCGCGACGACATCGTGCTGGAGCACCACAGCGCCTTCTTCGACGAT  
JJ238-24 TTGGGCGTGCAGGAGCGCGACGACATCGTGCTGGAGCACCACAGCGCCTTCTTCGACGAT  
JK2-10 TTGGGCGTGCAGGAGCGCGACGACATCGTGCTGGAGCACCACAGCGCCTTCTTCGACGAT  
JK4-1 TTGGGCGTGCAGGAGCGCGACGACATCGTGCTGGAGCACCACAGCGCCTTCTTCGACGAT  
JK143-11 TTGGGCGTGCAGGAGCGCGACGACATCGTGCTGGAGCACCACAGCGCCTTCTTCGACGAT  
JS581 TTGGGCGTGCAGGAGCGCGACGACATCGTGCTGGAGCACCACAGCGCCTTCTTCGACGAT  
JS584 TTGGGCGTGCAGGAGCGCGACGACATCGTGCTGGAGCACCACAGCGCCTTCTTCGACGAT  
JW160-1 TTGGGCGTGCAGGAGCGCGACGACATCGTGCTGGAGCACCACAGCGCCTTCTTCGACGAT  
LB100-1 TTGGGCGTGCAGGAGCGCGACGACATCGTGCTGGAGCACCACAGCGCCTTCTTCGACGAT  
LC80 TTGGGCGTGCAGGAGCGCGACGACATCGTGCTGGAGCACCACAGCGCCTTCTTCGACGAT  
LD71a TTGGGCGTGCAGGAGCGCGACGACATCGTGCTGGAGCACCACAGCGCCTTCTTCGACGAT  
LE20-1 TTGGGCGTGCAGGAGCGCGACGACATCGTGCTGGAGCACCACAGCGCCTTCTTCGACGAT  
LG115 TTGGGCGTGCAGGAGCGCGACGACATCGTGCTGGAGCACCACAGCGCCTTCTTCGACGAT  
LG117 TTGGGCGTGCAGGAGCGCGACGACATCGTGCTGGAGCACCACAGCGCCTTCTTCGACGAT  
LH37-1 TTGGGCGTGCAGGAGCGCGACGACATCGTGCTGGAGCACCACAGCGCCTTCTTCGACGAT  
LMG9322 TTGGGCGTGCAGGAGCGCGACGACATCGTGCTGGAGCACCACAGCGCCTTCTTCGACGAT  
NCPPB3562 TTGGGCGTGCAGGAGCGCGACGACATCGTGCTGGAGCACCACAGCGCCTTCTTCGACGAT  
NCPPB3607 TTGGGCGTGCAGGAGCGCGACGACATCGTGCTGGAGCACCACAGCGCCTTCTTCGACGAT  
NCPPB3608 TTGGGCGTGCAGGAGCGCGACGACATCGTGCTGGAGCACCACAGCGCCTTCTTCGACGAT  
X2003-3218 TTGGGCGTGCAGGAGCGCGACGACATCGTGCTGGAGCACCACAGCGCCTTCTTCGACGAT  
JF90-2 TTGGGCGTGCAGGAGCGCGACGACATCGTGCTGGAGCACCACAGCGCCTTCTTCGACGAT  
JM35 TTGGGCGTGCAGGAGCGCGACGACATCGTGCTGGAGCACCACAGCGCCTTCTTCGACGAT  
\*\*\*\*\*





LG97 CGGGTCAGTCCGGTGTGTGACCCGCCACGCAACCCACGCTGCGCCTGGACCAGGGCTTC  
NCPPB3612 CGGGTCAGTCCGGTGTGTGACCCGCCACGCAACCCACGCTGCGCCTGGACCAGGGCTTC  
C40 CGGGTCAGTCCGGTGTGTGACCCGCCACGCAACCCACGCTGCGCCTGGACCAGGGCTTC  
CFBP2852 CGGGTCAGTCCGGTGTGTGACCCGCCACGCAACCCACGCTGCGCCTGGACCAGGGCTTC  
CFBP2911 CGGGTCAGTCCGGTGTGTGACCCGCCACGCAACCCACGCTGCGCCTGGACCAGGGCTTC  
FDC217 CGGGTCAGTCCGGTGTGTGACCCGCCACGCAACCCACGCTGCGCCTGGACCAGGGCTTC  
FDC1083 CGGGTCAGTCCGGTGTGTGACCCGCCACGCAACCCACGCTGCGCCTGGACCAGGGCTTC  
JF90-8 CGGGTCAGTCCGGTGTGTGACCCGCCACGCAACCCACGCTGCGCCTGGACCAGGGCTTC  
JJ10-1 CGGGTCAGTCCGGTGTGTGACCCGCCACGCAACCCACGCTGCGCCTGGACCAGGGCTTC  
JJ238-10 CGGGTCAGTCCGGTGTGTGACCCGCCACGCAACCCACGCTGCGCCTGGACCAGGGCTTC  
JJ238-24 CGGGTCAGTCCGGTGTGTGACCCGCCACGCAACCCACGCTGCGCCTGGACCAGGGCTTC  
JK2-10 CGGGTCAGTCCGGTGTGTGACCCGCCACGCAACCCACGCTGCGCCTGGACCAGGGCTTC  
JK4-1 CGGGTCAGTCCGGTGTGTGACCCGCCACGCAACCCACGCTGCGCCTGGACCAGGGCTTC  
JK143-11 CGGGTCAGTCCGGTGTGTGACCCGCCACGCAACCCACGCTGCGCCTGGACCAGGGCTTC  
JS581 CGGGTCAGTCCGGTGTGTGACCCGCCACGCAACCCACGCTGCGCCTGGACCAGGGCTTC  
JS584 CGGGTCAGTCCGGTGTGTGACCCGCCACGCAACCCACGCTGCGCCTGGACCAGGGCTTC  
JW160-1 CGGGTCAGTCCGGTGTGTGACCCGCCACGCAACCCACGCTGCGCCTGGACCAGGGCTTC  
LB100-1 CGGGTCAGTCCGGTGTGTGACCCGCCACGCAACCCACGCTGCGCCTGGACCAGGGCTTC  
LC80 CGGGTCAGTCCGGTGTGTGACCCGCCACGCAACCCACGCTGCGCCTGGACCAGGGCTTC  
LD71a CGGGTCAGTCCGGTGTGTGACCCGCCACGCAACCCACGCTGCGCCTGGACCAGGGCTTC  
LE20-1 CGGGTCAGTCCGGTGTGTGACCCGCCACGCAACCCACGCTGCGCCTGGACCAGGGCTTC  
LG115 CGGGTCAGTCCGGTGTGTGACCCGCCACGCAACCCACGCTGCGCCTGGACCAGGGCTTC  
LG117 CGGGTCAGTCCGGTGTGTGACCCGCCACGCAACCCACGCTGCGCCTGGACCAGGGCTTC  
LH37-1 CGGGTCAGTCCGGTGTGTGACCCGCCACGCAACCCACGCTGCGCCTGGACCAGGGCTTC  
LMG9322 CGGGTCAGTCCGGTGTGTGACCCGCCACGCAACCCACGCTGCGCCTGGACCAGGGCTTC  
NCPPB3562 CGGGTCAGTCCGGTGTGTGACCCGCCACGCAACCCACGCTGCGCCTGGACCAGGGCTTC  
NCPPB3607 CGGGTCAGTCCGGTGTGTGACCCGCCACGCAACCCACGCTGCGCCTGGACCAGGGCTTC  
NCPPB3608 CGGGTCAGTCCGGTGTGTGACCCGCCACGCAACCCACGCTGCGCCTGGACCAGGGCTTC  
X2003-3218 CGGGTCAGTCCGGTGTGTGACCCGCCACGCAACCCACGCTGCGCCTGGACCAGGGCTTC  
JF90-2 CGGGTCAGTCCGGTGTGTGACCCGCCACGCAACCCACGCTGCGCCTGGACCAGGGCTTC  
JM35 CGGGTCAGTCCGGTGTGTGACCCGCCACGCAACCCACGCTGCGCCTGGACCAGGGCTTC  
\*\*\*\*\*

LG97 GTTGGGGGTCTGGACCAGGTGCGAGAGCTGGTGGACGACCCACCGGCGCTGTATGCAAGG  
NCPPB3612 GTTGGGGGTCTGGACCAGGTGCGAGAGCTGGTGGACGACCCACCGGCGCTGTATGCAAGG  
C40 GTTGGGGGTCTGGACCAGGTGCGAGAGCTGGTGGACGACCCACCGGCGCTGTATGCAAGG  
CFBP2852 GTTGGGGGTCTGGACCAGGTGCGAGAGCTGGTGGACGACCCACCGGCGCTGTATGCAAGG  
CFBP2911 GTTGGGGGTCTGGACCAGGTGCGAGAGCTGGTGGACGACCCACCGGCGCTGTATGCAAGG  
FDC217 GTTGGGGGTCTGGACCAGGTGCGAGAGCTGGTGGACGACCCACCGGCGCTGTATGCAAGG  
FDC1083 GTTGGGGGTCTGGACCAGGTGCGAGAGCTGGTGGACGACCCACCGGCGCTGTATGCAAGG  
JF90-8 GTTGGGGGTCTGGACCAGGTGCGAGAGCTGGTGGACGACCCACCGGCGCTGTATGCAAGG  
JJ10-1 GTTGGGGGTCTGGACCAGGTGCGAGAGCTGGTGGACGACCCACCGGCGCTGTATGCAAGG  
JJ238-10 GTTGGGGGTCTGGACCAGGTGCGAGAGCTGGTGGACGACCCACCGGCGCTGTATGCAAGG  
JJ238-24 GTTGGGGGTCTGGACCAGGTGCGAGAGCTGGTGGACGACCCACCGGCGCTGTATGCAAGG  
JK2-10 GTTGGGGGTCTGGACCAGGTGCGAGAGCTGGTGGACGACCCACCGGCGCTGTATGCAAGG  
JK4-1 GTTGGGGGTCTGGACCAGGTGCGAGAGCTGGTGGACGACCCACCGGCGCTGTATGCAAGG  
JK143-11 GTTGGGGGTCTGGACCAGGTGCGAGAGCTGGTGGACGACCCACCGGCGCTGTATGCAAGG  
JS581 GTTGGGGGTCTGGACCAGGTGCGAGAGCTGGTGGACGACCCACCGGCGCTGTATGCAAGG  
JS584 GTTGGGGGTCTGGACCAGGTGCGAGAGCTGGTGGACGACCCACCGGCGCTGTATGCAAGG  
JW160-1 GTTGGGGGTCTGGACCAGGTGCGAGAGCTGGTGGACGACCCACCGGCGCTGTATGCAAGG  
LB100-1 GTTGGGGGTCTGGACCAGGTGCGAGAGCTGGTGGACGACCCACCGGCGCTGTATGCAAGG  
LC80 GTTGGGGGTCTGGACCAGGTGCGAGAGCTGGTGGACGACCCACCGGCGCTGTATGCAAGG  
LD71a GTTGGGGGTCTGGACCAGGTGCGAGAGCTGGTGGACGACCCACCGGCGCTGTATGCAAGG  
LE20-1 GTTGGGGGTCTGGACCAGGTGCGAGAGCTGGTGGACGACCCACCGGCGCTGTATGCAAGG  
LG115 GTTGGGGGTCTGGACCAGGTGCGAGAGCTGGTGGACGACCCACCGGCGCTGTATGCAAGG  
LG117 GTTGGGGGTCTGGACCAGGTGCGAGAGCTGGTGGACGACCCACCGGCGCTGTATGCAAGG  
LH37-1 GTTGGGGGTCTGGACCAGGTGCGAGAGCTGGTGGACGACCCACCGGCGCTGTATGCAAGG  
LMG9322 GTTGGGGGTCTGGACCAGGTGCGAGAGCTGGTGGACGACCCACCGGCGCTGTATGCAAGG  
NCPPB3562 GTTGGGGGTCTGGACCAGGTGCGAGAGCTGGTGGACGACCCACCGGCGCTGTATGCAAGG  
NCPPB3607 GTTGGGGGTCTGGACCAGGTGCGAGAGCTGGTGGACGACCCACCGGCGCTGTATGCAAGG  
NCPPB3608 GTTGGGGGTCTGGACCAGGTGCGAGAGCTGGTGGACGACCCACCGGCGCTGTATGCAAGG  
X2003-3218 GTTGGGGGTCTGGACCAGGTGCGAGAGCTGGTGGACGACCCACCGGCGCTGTATGCAAGG  
JF90-2 GTTGGGGGTCTGGACCAGGTGCGAGAGCTGGTGGACGACCCACCGGCGCTGTATGCAAGG  
JM35 GTTGGGGGTCTGGACCAGGTGCGAGAGCTGGTGGACGACCCACCGGCGCTGTATGCAAGG  
\*\*\*\*\*



LG97 TTCGACGCGATCGCCGACCGACCCGGTGCACGGCACTTGACCACGCTGATGCACGCGCGC  
NCPPB3612 TTCGACGCGATCGCCGACCGACCCGGTGCACGGCACTTGACCACGCTGATGCACGCGCGC  
C40 TTCGACGCGATCGCCGACCGACCCGGTGCACGGCACTTGACCACGCTGATGCACGCGCGC  
CFBP2852 TTCGACGCGATCGCCGACCGACCCGGTGCACGGCACTTGACCACGCTGATGCACGCGCGC  
CFBP2911 TTCGACGCGATCGCCGACCGACCCGGTGCACGGCACTTGACCACGCTGATGCACGCGCGC  
FDC217 TTCGACGCGATCGCCGACCGACCCGGTGCACGGCACTTGACCACGCTGATGCACGCGCGC  
FDC1083 TTCGACGCGATCGCCGACCGACCCGGTGCACGGCACTTGACCACGCTGATGCACGCGCGC  
JF90-8 TTCGACGCGATCGCCGACCGACCCGGTGCACGGCACTTGACCACGCTGATGCACGCGCGC  
JJ10-1 TTCGACGCGATCGCCGACCGACCCGGTGCACGGCACTTGACCACGCTGATGCACGCGCGC  
JJ238-10 TTCGACGCGATCGCCGACCGACCCGGTGCACGGCACTTGACCACGCTGATGCACGCGCGC  
JJ238-24 TTCGACGCGATCGCCGACCGACCCGGTGCACGGCACTTGACCACGCTGATGCACGCGCGC  
JK2-10 TTCGACGCGATCGCCGACCGACCCGGTGCACGGCACTTGACCACGCTGATGCACGCGCGC  
JK4-1 TTCGACGCGATCGCCGACCGACCCGGTGCACGGCACTTGACCACGCTGATGCACGCGCGC  
JK143-11 TTCGACGCGATCGCCGACCGACCCGGTGCACGGCACTTGACCACGCTGATGCACGCGCGC  
JS581 TTCGACGCGATCGCCGACCGACCCGGTGCACGGCACTTGACCACGCTGATGCACGCGCGC  
JS584 TTCGACGCGATCGCCGACCGACCCGGTGCACGGCACTTGACCACGCTGATGCACGCGCGC  
JW160-1 TTCGACGCGATCGCCGACCGACCCGGTGCACGGCACTTGACCACGCTGATGCACGCGCGC  
LB100-1 TTCGACGCGATCGCCGACCGACCCGGTGCACGGCACTTGACCACGCTGATGCACGCGCGC  
LC80 TTCGACGCGATCGCCGACCGACCCGGTGCACGGCACTTGACCACGCTGATGCACGCGCGC  
LD71a TTCGACGCGATCGCCGACCGACCCGGTGCACGGCACTTGACCACGCTGATGCACGCGCGC  
LE20-1 TTCGACGCGATCGCCGACCGACCCGGTGCACGGCACTTGACCACGCTGATGCACGCGCGC  
LG115 TTCGACGCGATCGCCGACCGACCCGGTGCACGGCACTTGACCACGCTGATGCACGCGCGC  
LG117 TTCGACGCGATCGCCGACCGACCCGGTGCACGGCACTTGACCACGCTGATGCACGCGCGC  
LH37-1 TTCGACGCGATCGCCGACCGACCCGGTGCACGGCACTTGACCACGCTGATGCACGCGCGC  
LMG9322 TTCGACGCGATCGCCGACCGACCCGGTGCACGGCACTTGACCACGCTGATGCACGCGCGC  
NCPPB3562 TTCGACGCGATCGCCGACCGACCCGGTGCACGGCACTTGACCACGCTGATGCACGCGCGC  
NCPPB3607 TTCGACGCGATCGCCGACCGACCCGGTGCACGGCACTTGACCACGCTGATGCACGCGCGC  
NCPPB3608 TTCGACGCGATCGCCGACCGACCCGGTGCACGGCACTTGACCACGCTGATGCACGCGCGC  
X2003-3218 TTCGACGCGATCGCCGACCGACCCGGTGCACGGCACTTGACCACGCTGATGCACGCGCGC  
JF90-2 TTCGACGCGATCGCCGACCGACCCGGTGCACGGCACTTGACCACGCTGATGCACGCGCGC  
JM35 TTCGACGCGATCGCCGACCGACCCGGTGCACGGCACTTGACCACGCTGATGCACGCGCGC  
\*\*\*\*\*

LG97 CACCGCAGCGCGGTGCTGGCCGAAGACTGCGCGAAGACCTGAAAGCAGGCCGGCCATGCCGG  
NCPPB3612 CACCGCAGCGCGGTGCTGGCCGAAGACTGCGCGAAGACCTGAAAGCAGGCCGGCCATGCCGG  
C40 CACCGCAGCGCGGTGCTGGCCGAAGACTGCGCGAAGACCTGAAAGCAGGCCGGCCATGCCGG  
CFBP2852 CACCGCAGCGCGGTGCTGGCCGAAGACTGCGCGAAGACCTGAAAGCAGGCCGGCCATGCCGG  
CFBP2911 CACCGCAGCGCGGTGCTGGCCGAAGACTGCGCGAAGACCTGAAAGCAGGCCGGCCATGCCGG  
FDC217 CACCGCAGCGCGGTGCTGGCCGAAGACTGCGCGAAGACCTGAAAGCAGGCCGGCCATGCCGG  
FDC1083 CACCGCAGCGCGGTGCTGGCCGAAGACTGCGCGAAGACCTGAAAGCAGGCCGGCCATGCCGG  
JF90-8 CACCGCAGCGCGGTGCTGGCCGAAGACTGCGCGAAGACCTGAAAGCAGGCCGGCCATGCCGG  
JJ10-1 CACCGCAGCGCGGTGCTGGCCGAAGACTGCGCGAAGACCTGAAAGCAGGCCGGCCATGCCGG  
JJ238-10 CACCGCAGCGCGGTGCTGGCCGAAGACTGCGCGAAGACCTGAAAGCAGGCCGGCCATGCCGG  
JJ238-24 CACCGCAGCGCGGTGCTGGCCGAAGACTGCGCGAAGACCTGAAAGCAGGCCGGCCATGCCGG  
JK2-10 CACCGCAGCGCGGTGCTGGCCGAAGACTGCGCGAAGACCTGAAAGCAGGCCGGCCATGCCGG  
JK4-1 CACCGCAGCGCGGTGCTGGCCGAAGACTGCGCGAAGACCTGAAAGCAGGCCGGCCATGCCGG  
JK143-11 CACCGCAGCGCGGTGCTGGCCGAAGACTGCGCGAAGACCTGAAAGCAGGCCGGCCATGCCGG  
JS581 CACCGCAGCGCGGTGCTGGCCGAAGACTGCGCGAAGACCTGAAAGCAGGCCGGCCATGCCGG  
JS584 CACCGCAGCGCGGTGCTGGCCGAAGACTGCGCGAAGACCTGAAAGCAGGCCGGCCATGCCGG  
JW160-1 CACCGCAGCGCGGTGCTGGCCGAAGACTGCGCGAAGACCTGAAAGCAGGCCGGCCATGCCGG  
LB100-1 CACCGCAGCGCGGTGCTGGCCGAAGACTGCGCGAAGACCTGAAAGCAGGCCGGCCATGCCGG  
LC80 CACCGCAGCGCGGTGCTGGCCGAAGACTGCGCGAAGACCTGAAAGCAGGCCGGCCATGCCGG  
LD71a CACCGCAGCGCGGTGCTGGCCGAAGACTGCGCGAAGACCTGAAAGCAGGCCGGCCATGCCGG  
LE20-1 CACCGCAGCGCGGTGCTGGCCGAAGACTGCGCGAAGACCTGAAAGCAGGCCGGCCATGCCGG  
LG115 CACCGCAGCGCGGTGCTGGCCGAAGACTGCGCGAAGACCTGAAAGCAGGCCGGCCATGCCGG  
LG117 CACCGCAGCGCGGTGCTGGCCGAAGACTGCGCGAAGACCTGAAAGCAGGCCGGCCATGCCGG  
LH37-1 CACCGCAGCGCGGTGCTGGCCGAAGACTGCGCGAAGACCTGAAAGCAGGCCGGCCATGCCGG  
LMG9322 CACCGCAGCGCGGTGCTGGCCGAAGACTGCGCGAAGACCTGAAAGCAGGCCGGCCATGCCGG  
NCPPB3562 CACCGCAGCGCGGTGCTGGCCGAAGACTGCGCGAAGACCTGAAAGCAGGCCGGCCATGCCGG  
NCPPB3607 CACCGCAGCGCGGTGCTGGCCGAAGACTGCGCGAAGACCTGAAAGCAGGCCGGCCATGCCGG  
NCPPB3608 CACCGCAGCGCGGTGCTGGCCGAAGACTGCGCGAAGACCTGAAAGCAGGCCGGCCATGCCGG  
X2003-3218 CACCGCAGCGCGGTGCTGGCCGAAGACTGCGCGAAGACCTGAAAGCAGGCCGGCCATGCCGG  
JF90-2 CACCGCAGCGCGGTGCTGGCCGAAGACTGCGCGAAGACCTGAAAGCAGGCCGGCCATGCCGG  
JM35 CACCGCAGCGCGGTGCTGGCCGAAGACTGCGCGAAGACCTGAAAGCAGGCCGGCCATGCCGG  
\*\*\*\*\*

LG97 CTGGTCGCCACGAGCTTGATAGAAGCGGGGGTGGACGTGGACTTCCCAACGGTGCTGCGC  
NCPPB3612 CTGGTCGCCACGAGCTTGATAGAAGCGGGGGTGGACGTGGACTTCCCAACGGTGCTGCGC  
C40 CTGGTCGCCACGAGCTTGATAGAAGCGGGGGTGGACGTGGACTTCCCAACGGTGCTGCGC  
CFBP2852 CTGGTCGCCACGAGCTTGATAGAAGCGGGGGTGGACGTGGACTTCCCAACGGTGCTGCGC  
CFBP2911 CTGGTCGCCACGAGCTTGATAGAAGCGGGGGTGGACGTGGACTTCCCAACGGTGCTGCGC  
FDC217 CTGGTCGCCACGAGCTTGATAGAAGCGGGGGTGGACGTGGACTTCCCAACGGTGCTGCGC  
FDC1083 CTGGTCGCCACGAGCTTGATAGAAGCGGGGGTGGACGTGGACTTCCCAACGGTGCTGCGC  
JF90-8 CTGGTCGCCACGAGCTTGATAGAAGCGGGGGTGGACGTGGACTTCCCAACGGTGCTGCGC  
JJ10-1 CTGGTCGCCACGAGCTTGATAGAAGCGGGGGTGGACGTGGACTTCCCAACGGTGCTGCGC  
JJ238-10 CTGGTCGCCACGAGCTTGATAGAAGCGGGGGTGGACGTGGACTTCCCAACGGTGCTGCGC  
JJ238-24 CTGGTCGCCACGAGCTTGATAGAAGCGGGGGTGGACGTGGACTTCCCAACGGTGCTGCGC  
JK2-10 CTGGTCGCCACGAGCTTGATAGAAGCGGGGGTGGACGTGGACTTCCCAACGGTGCTGCGC  
JK4-1 CTGGTCGCCACGAGCTTGATAGAAGCGGGGGTGGACGTGGACTTCCCAACGGTGCTGCGC  
JK143-11 CTGGTCGCCACGAGCTTGATAGAAGCGGGGGTGGACGTGGACTTCCCAACGGTGCTGCGC  
JS581 CTGGTCGCCACGAGCTTGATAGAAGCGGGGGTGGACGTGGACTTCCCAACGGTGCTGCGC  
JS584 CTGGTCGCCACGAGCTTGATAGAAGCGGGGGTGGACGTGGACTTCCCAACGGTGCTGCGC  
JW160-1 CTGGTCGCCACGAGCTTGATAGAAGCGGGGGTGGACGTGGACTTCCCAACGGTGCTGCGC  
LB100-1 CTGGTCGCCACGAGCTTGATAGAAGCGGGGGTGGACGTGGACTTCCCAACGGTGCTGCGC  
LC80 CTGGTCGCCACGAGCTTGATAGAAGCGGGGGTGGACGTGGACTTCCCAACGGTGCTGCGC  
LD71a CTGGTCGCCACGAGCTTGATAGAAGCGGGGGTGGACGTGGACTTCCCAACGGTGCTGCGC  
LE20-1 CTGGTCGCCACGAGCTTGATAGAAGCGGGGGTGGACGTGGACTTCCCAACGGTGCTGCGC  
LG115 CTGGTCGCCACGAGCTTGATAGAAGCGGGGGTGGACGTGGACTTCCCAACGGTGCTGCGC  
LG117 CTGGTCGCCACGAGCTTGATAGAAGCGGGGGTGGACGTGGACTTCCCAACGGTGCTGCGC  
LH37-1 CTGGTCGCCACGAGCTTGATAGAAGCGGGGGTGGACGTGGACTTCCCAACGGTGCTGCGC  
LMG9322 CTGGTCGCCACGAGCTTGATAGAAGCGGGGGTGGACGTGGACTTCCCAACGGTGCTGCGC  
NCPPB3562 CTGGTCGCCACGAGCTTGATAGAAGCGGGGGTGGACGTGGACTTCCCAACGGTGCTGCGC  
NCPPB3607 CTGGTCGCCACGAGCTTGATAGAAGCGGGGGTGGACGTGGACTTCCCAACGGTGCTGCGC  
NCPPB3608 CTGGTCGCCACGAGCTTGATAGAAGCGGGGGTGGACGTGGACTTCCCAACGGTGCTGCGC  
X2003-3218 CTGGTCGCCACGAGCTTGATAGAAGCGGGGGTGGACGTGGACTTCCCAACGGTGCTGCGC  
JF90-2 CTGGTCGCCACGAGCTTGATAGAAGCGGGGGTGGACGTGGACTTCCCAACGGTGCTGCGC  
JM35 CTGGTCGCCACGAGCTTGATAGAAGCGGGGGTGGACGTGGACTTCCCAACGGTGCTGCGC  
\*\*\*\*\*

LG97 GCTAAGCCGGTCTGGATTCCATCGCCAGGCTGCCGCGCGTGCAACCGCGAAGGCTTG  
NCPPB3612 GCTGAAGCCGGTCTGGATTCCATCGCCAGGCTGCCGCGCGTGCAACCGCGAAGGCTTG  
C40 GCTGAAGCCGGTCTGGATTCCATCGCCAGGCTGCCGCGCGTGCAACCGCGAAGGCTTG  
CFBP2852 GCTGAAGCCGGTCTGGATTCCATCGCCAGGCTGCCGCGCGTGCAACCGCGAAGGCTTG  
CFBP2911 GCTGAAGCCGGTCTGGATTCCATCGCCAGGCTGCCGCGCGTGCAACCGCGAAGGCTTG  
FDC217 GCTGAAGCCGGTCTGGATTCCATCGCCAGGCTGCCGCGCGTGCAACCGCGAAGGCTTG  
FDC1083 GCTGAAGCCGGTCTGGATTCCATCGCCAGGCTGCCGCGCGTGCAACCGCGAAGGCTTG  
JF90-8 GCTGAAGCCGGTCTGGATTCCATCGCCAGGCTGCCGCGCGTGCAACCGCGAAGGCTTG  
JJ10-1 GCTGAAGCCGGTCTGGATTCCATCGCCAGGCTGCCGCGCGTGCAACCGCGAAGGCTTG  
JJ238-10 GCTGAAGCCGGTCTGGATTCCATCGCCAGGCTGCCGCGCGTGCAACCGCGAAGGCTTG  
JJ238-24 GCTGAAGCCGGTCTGGATTCCATCGCCAGGCTGCCGCGCGTGCAACCGCGAAGGCTTG  
JK2-10 GCTGAAGCCGGTCTGGATTCCATCGCCAGGCTGCCGCGCGTGCAACCGCGAAGGCTTG  
JK4-1 GCTGAAGCCGGTCTGGATTCCATCGCCAGGCTGCCGCGCGTGCAACCGCGAAGGCTTG  
JK143-11 GCTGAAGCCGGTCTGGATTCCATCGCCAGGCTGCCGCGCGTGCAACCGCGAAGGCTTG  
JS581 GCTGAAGCCGGTCTGGATTCCATCGCCAGGCTGCCGCGCGTGCAACCGCGAAGGCTTG  
JS584 GCTGAAGCCGGTCTGGATTCCATCGCCAGGCTGCCGCGCGTGCAACCGCGAAGGCTTG  
JW160-1 GCTGAAGCCGGTCTGGATTCCATCGCCAGGCTGCCGCGCGTGCAACCGCGAAGGCTTG  
LB100-1 GCTGAAGCCGGTCTGGATTCCATCGCCAGGCTGCCGCGCGTGCAACCGCGAAGGCTTG  
LC80 GCTGAAGCCGGTCTGGATTCCATCGCCAGGCTGCCGCGCGTGCAACCGCGAAGGCTTG  
LD71a GCTGAAGCCGGTCTGGATTCCATCGCCAGGCTGCCGCGCGTGCAACCGCGAAGGCTTG  
LE20-1 GCTGAAGCCGGTCTGGATTCCATCGCCAGGCTGCCGCGCGTGCAACCGCGAAGGCTTG  
LG115 GCTGAAGCCGGTCTGGATTCCATCGCCAGGCTGCCGCGCGTGCAACCGCGAAGGCTTG  
LG117 GCTGAAGCCGGTCTGGATTCCATCGCCAGGCTGCCGCGCGTGCAACCGCGAAGGCTTG  
LH37-1 GCTGAAGCCGGTCTGGATTCCATCGCCAGGCTGCCGCGCGTGCAACCGCGAAGGCTTG  
LMG9322 GCTGAAGCCGGTCTGGATTCCATCGCCAGGCTGCCGCGCGTGCAACCGCGAAGGCTTG  
NCPPB3562 GCTGAAGCCGGTCTGGATTCCATCGCCAGGCTGCCGCGCGTGCAACCGCGAAGGCTTG  
NCPPB3607 GCTGAAGCCGGTCTGGATTCCATCGCCAGGCTGCCGCGCGTGCAACCGCGAAGGCTTG  
NCPPB3608 GCTGAAGCCGGTCTGGATTCCATCGCCAGGCTGCCGCGCGTGCAACCGCGAAGGCTTG  
X2003-3218 GCTGAAGCCGGTCTGGATTCCATCGCCAGGCTGCCGCGCGTGCAACCGCGAAGGCTTG  
JF90-2 GCTGAAGCCGGTCTGGATTCCATCGCCAGGCTGCCGCGCGTGCAACCGCGAAGGCTTG  
JM35 GCTGAAGCCGGTCTGGATTCCATCGCCAGGCTGCCGCGCGTGCAACCGCGAAGGCTTG  
\*\*\* \*\*\*\*\*

LG97 CGGCCGGTAGAGGTCAGCCAAGTGCAGGTATTTCGCGCCGGCCAAATCCCGACTGGGCACCG  
NCPPB3612 CGGCCGGTAGAGGTCAGCCAAGTGCAGGTATTTCGCGCCGGCCAAATCCCGACTGGGCACCG  
C40 CGGCCGGTAGAGGTCAGCCAAGTGCAGGTATTTCGCGCCGGCCAAATCCCGACTGGGCACCG  
CFBP2852 CGGCCGGTAGAGGTCAGCCAAGTGCAGGTATTTCGCGCCGGCCAAATCCCGACTGGGCACCG  
CFBP2911 CGGCCGGTAGAGGTCAGCCAAGTGCAGGTATTTCGCGCCGGCCAAATCCCGACTGGGCACCG  
FDC217 CGGCCGGTAGAGGTCAGCCAAGTGCAGGTATTTCGCGCCGGCCAAATCCCGACTGGGCACCG  
FDC1083 CGGCCGGTAGAGGTCAGCCAAGTGCAGGTATTTCGCGCCGGCCAAATCCCGACTGGGCACCG  
JF90-8 CGGCCGGTAGAGGTCAGCCAAGTGCAGGTATTTCGCGCCGGCCAAATCCCGACTGGGCACCG  
JJ10-1 CGGCCGGTAGAGGTCAGCCAAGTGCAGGTATTTCGCGCCGGCCAAATCCCGACTGGGCACCG  
JJ238-10 CGGCCGGTAGAGGTCAGCCAAGTGCAGGTATTTCGCGCCGGCCAAATCCCGACTGGGCACCG  
JJ238-24 CGGCCGGTAGAGGTCAGCCAAGTGCAGGTATTTCGCGCCGGCCAAATCCCGACTGGGCACCG  
JK2-10 CGGCCGGTAGAGGTCAGCCAAGTGCAGGTATTTCGCGCCGGCCAAATCCCGACTGGGCACCG  
JK4-1 CGGCCGGTAGAGGTCAGCCAAGTGCAGGTATTTCGCGCCGGCCAAATCCCGACTGGGCACCG  
JK143-11 CGGCCGGTAGAGGTCAGCCAAGTGCAGGTATTTCGCGCCGGCCAAATCCCGACTGGGCACCG  
JS581 CGGCCGGTAGAGGTCAGCCAAGTGCAGGTATTTCGCGCCGGCCAAATCCCGACTGGGCACCG  
JS584 CGGCCGGTAGAGGTCAGCCAAGTGCAGGTATTTCGCGCCGGCCAAATCCCGACTGGGCACCG  
JW160-1 CGGCCGGTAGAGGTCAGCCAAGTGCAGGTATTTCGCGCCGGCCAAATCCCGACTGGGCACCG  
LB100-1 CGGCCGGTAGAGGTCAGCCAAGTGCAGGTATTTCGCGCCGGCCAAATCCCGACTGGGCACCG  
LC80 CGGCCGGTAGAGGTCAGCCAAGTGCAGGTATTTCGCGCCGGCCAAATCCCGACTGGGCACCG  
LD71a CGGCCGGTAGAGGTCAGCCAAGTGCAGGTATTTCGCGCCGGCCAAATCCCGACTGGGCACCG  
LE20-1 CGGCCGGTAGAGGTCAGCCAAGTGCAGGTATTTCGCGCCGGCCAAATCCCGACTGGGCACCG  
LG115 CGGCCGGTAGAGGTCAGCCAAGTGCAGGTATTTCGCGCCGGCCAAATCCCGACTGGGCACCG  
LG117 CGGCCGGTAGAGGTCAGCCAAGTGCAGGTATTTCGCGCCGGCCAAATCCCGACTGGGCACCG  
LH37-1 CGGCCGGTAGAGGTCAGCCAAGTGCAGGTATTTCGCGCCGGCCAAATCCCGACTGGGCACCG  
LMG9322 CGGCCGGTAGAGGTCAGCCAAGTGCAGGTATTTCGCGCCGGCCAAATCCCGACTGGGCACCG  
NCPPB3562 CGGCCGGTAGAGGTCAGCCAAGTGCAGGTATTTCGCGCCGGCCAAATCCCGACTGGGCACCG  
NCPPB3607 CGGCCGGTAGAGGTCAGCCAAGTGCAGGTATTTCGCGCCGGCCAAATCCCGACTGGGCACCG  
NCPPB3608 CGGCCGGTAGAGGTCAGCCAAGTGCAGGTATTTCGCGCCGGCCAAATCCCGACTGGGCACCG  
X2003-3218 CGGCCGGTAGAGGTCAGCCAAGTGCAGGTATTTCGCGCCGGCCAAATCCCGACTGGGCACCG  
JF90-2 CGGCCGGTAGAGGTCAGCCAAGTGCAGGTATTTCGCGCCGGCCAAATCCCGACTGGGCACCG  
JM35 CGGCCGGTAGAGGTCAGCCAAGTGCAGGTATTTCGCGCCGGCCAAATCCCGACTGGGCACCG  
\*\*\*\*\*

LG97 CCAAAGGAAGTACACTGTTTTGCAGAGGTCTTCCGTGGCATCGAGCGTACCCACCGCAAC  
NCPPB3612 CCAAAGGAAGTACACTGTTTTGCAGAGGTCTTCCGTGGCATCGAGCGTACCCACCGCAAC  
C40 CCAAAGGAAGTACACTGTTTTGCAGAGGTCTTCCGTGGCATCGAGCGTACCCACCGCAAC  
CFBP2852 CCAAAGGAAGTACACTGTTTTGCAGAGGTCTTCCGTGGCATCGAGCGTACCCACCGCAAC  
CFBP2911 CCAAAGGAAGTACACTGTTTTGCAGAGGTCTTCCGTGGCATCGAGCGTACCCACCGCAAC  
FDC217 CCAAAGGAAGTACACTGTTTTGCAGAGGTCTTCCGTGGCATCGAGCGTACCCACCGCAAC  
FDC1083 CCAAAGGAAGTACACTGTTTTGCAGAGGTCTTCCGTGGCATCGAGCGTACCCACCGCAAC  
JF90-8 CCAAAGGAAGTACACTGTTTTGCAGAGGTCTTCCGTGGCATCGAGCGTACCCACCGCAAC  
JJ10-1 CCAAAGGAAGTACACTGTTTTGCAGAGGTCTTCCGTGGCATCGAGCGTACCCACCGCAAC  
JJ238-10 CCAAAGGAAGTACACTGTTTTGCAGAGGTCTTCCGTGGCATCGAGCGTACCCACCGCAAC  
JJ238-24 CCAAAGGAAGTACACTGTTTTGCAGAGGTCTTCCGTGGCATCGAGCGTACCCACCGCAAC  
JK2-10 CCAAAGGAAGTACACTGTTTTGCAGAGGTCTTCCGTGGCATCGAGCGTACCCACCGCAAC  
JK4-1 CCAAAGGAAGTACACTGTTTTGCAGAGGTCTTCCGTGGCATCGAGCGTACCCACCGCAAC  
JK143-11 CCAAAGGAAGTACACTGTTTTGCAGAGGTCTTCCGTGGCATCGAGCGTACCCACCGCAAC  
JS581 CCAAAGGAAGTACACTGTTTTGCAGAGGTCTTCCGTGGCATCGAGCGTACCCACCGCAAC  
JS584 CCAAAGGAAGTACACTGTTTTGCAGAGGTCTTCCGTGGCATCGAGCGTACCCACCGCAAC  
JW160-1 CCAAAGGAAGTACACTGTTTTGCAGAGGTCTTCCGTGGCATCGAGCGTACCCACCGCAAC  
LB100-1 CCAAAGGAAGTACACTGTTTTGCAGAGGTCTTCCGTGGCATCGAGCGTACCCACCGCAAC  
LC80 CCAAAGGAAGTACACTGTTTTGCAGAGGTCTTCCGTGGCATCGAGCGTACCCACCGCAAC  
LD71a CCAAAGGAAGTACACTGTTTTGCAGAGGTCTTCCGTGGCATCGAGCGTACCCACCGCAAC  
LE20-1 CCAAAGGAAGTACACTGTTTTGCAGAGGTCTTCCGTGGCATCGAGCGTACCCACCGCAAC  
LG115 CCAAAGGAAGTACACTGTTTTGCAGAGGTCTTCCGTGGCATCGAGCGTACCCACCGCAAC  
LG117 CCAAAGGAAGTACACTGTTTTGCAGAGGTCTTCCGTGGCATCGAGCGTACCCACCGCAAC  
LH37-1 CCAAAGGAAGTACACTGTTTTGCAGAGGTCTTCCGTGGCATCGAGCGTACCCACCGCAAC  
LMG9322 CCAAAGGAAGTACACTGTTTTGCAGAGGTCTTCCGTGGCATCGAGCGTACCCACCGCAAC  
NCPPB3562 CCAAAGGAAGTACACTGTTTTGCAGAGGTCTTCCGTGGCATCGAGCGTACCCACCGCAAC  
NCPPB3607 CCAAAGGAAGTACACTGTTTTGCAGAGGTCTTCCGTGGCATCGAGCGTACCCACCGCAAC  
NCPPB3608 CCAAAGGAAGTACACTGTTTTGCAGAGGTCTTCCGTGGCATCGAGCGTACCCACCGCAAC  
X2003-3218 CCAAAGGAAGTACACTGTTTTGCAGAGGTCTTCCGTGGCATCGAGCGTACCCACCGCAAC  
JF90-2 CCAAAGGAAGTACACTGTTTTGCAGAGGTCTTCCGTGGCATCGAGCGTACCCACCGCAAC  
JM35 CCAAAGGAAGTACACTGTTTTGCAGAGGTCTTCCGTGGCATCGAGCGTACCCACCGCAAC  
\*\*\*\*\*





LG97 TTGCCGCTGGACACCCCTGGCGCGGAAATTC AAGATGATCCAGACCACCCCTGCGGCCGCTG  
NCPPB3612 TTGCCGCTGGACACCCCTGGCGCGGAAATTC AAGATGATCCAGACCACCCCTGCGGCCGCTG  
C40 TTGCCGCTGGACACCCCTGGCGCGGAAATTC AAGATGATCCAGACCACCCCTGCGGCCGCTG  
CFBP2852 TTGCCGCTGGACACCCCTGGCGCGGAAATTC AAGATGATCCAGACCACCCCTGCGGCCGCTG  
CFBP2911 TTGCCGCTGGACACCCCTGGCGCGGAAATTC AAGATGATCCAGACCACCCCTGCGGCCGCTG  
FDC217 TTGCCGCTGGACACCCCTGGCGCGGAAATTC AAGATGATCCAGACCACCCCTGCGGCCGCTG  
FDC1083 TTGCCGCTGGACACCCCTGGCGCGGAAATTC AAGATGATCCAGACCACCCCTGCGGCCGCTG  
JF90-8 TTGCCGCTGGACACCCCTGGCGCGGAAATTC AAGATGATCCAGACCACCCCTGCGGCCGCTG  
JJ10-1 TTGCCGCTGGACACCCCTGGCGCGGAAATTC AAGATGATCCAGACCACCCCTGCGGCCGCTG  
JJ238-10 TTGCCGCTGGACACCCCTGGCGCGGAAATTC AAGATGATCCAGACCACCCCTGCGGCCGCTG  
JJ238-24 TTGCCGCTGGACACCCCTGGCGCGGAAATTC AAGATGATCCAGACCACCCCTGCGGCCGCTG  
JK2-10 TTGCCGCTGGACACCCCTGGCGCGGAAATTC AAGATGATCCAGACCACCCCTGCGGCCGCTG  
JK4-1 TTGCCGCTGGACACCCCTGGCGCGGAAATTC AAGATGATCCAGACCACCCCTGCGGCCGCTG  
JK143-11 TTGCCGCTGGACACCCCTGGCGCGGAAATTC AAGATGATCCAGACCACCCCTGCGGCCGCTG  
JS581 TTGCCGCTGGACACCCCTGGCGCGGAAATTC AAGATGATCCAGACCACCCCTGCGGCCGCTG  
JS584 TTGCCGCTGGACACCCCTGGCGCGGAAATTC AAGATGATCCAGACCACCCCTGCGGCCGCTG  
JW160-1 TTGCCGCTGGACACCCCTGGCGCGGAAATTC AAGATGATCCAGACCACCCCTGCGGCCGCTG  
LB100-1 TTGCCGCTGGACACCCCTGGCGCGGAAATTC AAGATGATCCAGACCACCCCTGCGGCCGCTG  
LC80 TTGCCGCTGGACACCCCTGGCGCGGAAATTC AAGATGATCCAGACCACCCCTGCGGCCGCTG  
LD71a TTGCCGCTGGACACCCCTGGCGCGGAAATTC AAGATGATCCAGACCACCCCTGCGGCCGCTG  
LE20-1 TTGCCGCTGGACACCCCTGGCGCGGAAATTC AAGATGATCCAGACCACCCCTGCGGCCGCTG  
LG115 TTGCCGCTGGACACCCCTGGCGCGGAAATTC AAGATGATCCAGACCACCCCTGCGGCCGCTG  
LG117 TTGCCGCTGGACACCCCTGGCGCGGAAATTC AAGATGATCCAGACCACCCCTGCGGCCGCTG  
LH37-1 TTGCCGCTGGACACCCCTGGCGCGGAAATTC AAGATGATCCAGACCACCCCTGCGGCCGCTG  
LMG9322 TTGCCGCTGGACACCCCTGGCGCGGAAATTC AAGATGATCCAGACCACCCCTGCGGCCGCTG  
NCPPB3562 TTGCCGCTGGACACCCCTGGCGCGGAAATTC AAGATGATCCAGACCACCCCTGCGGCCGCTG  
NCPPB3607 TTGCCGCTGGACACCCCTGGCGCGGAAATTC AAGATGATCCAGACCACCCCTGCGGCCGCTG  
NCPPB3608 TTGCCGCTGGACACCCCTGGCGCGGAAATTC AAGATGATCCAGACCACCCCTGCGGCCGCTG  
X2003-3218 TTGCCGCTGGACACCCCTGGCGCGGAAATTC AAGATGATCCAGACCACCCCTGCGGCCGCTG  
JF90-2 TTGCCGCTGGACACCCCTGGCGCGGAAATTC AAGATGATCCAGACCACCCCTGCGGCCGCTG  
JM35 TTGCCGCTGGACACCCCTGGCGCGGAAATTC AAGATGATCCAGACCACCCCTGCGGCCGCTG  
\*\*\*\*\*

LG97 ATCGTACCGTACGCCCCCTACGCCGAAGGCTGCGACAAAGAGGTGCCCGAGGTGGCCGAC  
NCPPB3612 ATCGTACCGTACGCCCCCTACGCCGAAGGCTGCGACAAAGAGGTGCCCGAGGTGGCCGAC  
C40 ATCGTACCGTACGCCCCCTACGCCGAAGGCTGCGACAAAGAGGTGCCCGAGGTGGCCGAC  
CFBP2852 ATCGTACCGTACGCCCCCTACGCCGAAGGCTGCGACAAAGAGGTGCCCGAGGTGGCCGAC  
CFBP2911 ATCGTACCGTACGCCCCCTACGCCGAAGGCTGCGACAAAGAGGTGCCCGAGGTGGCCGAC  
FDC217 ATCGTACCGTACGCCCCCTACGCCGAAGGCTGCGACAAAGAGGTGCCCGAGGTGGCCGAC  
FDC1083 ATCGTACCGTACGCCCCCTACGCCGAAGGCTGCGACAAAGAGGTGCCCGAGGTGGCCGAC  
JF90-8 ATCGTACCGTACGCCCCCTACGCCGAAGGCTGCGACAAAGAGGTGCCCGAGGTGGCCGAC  
JJ10-1 ATCGTACCGTACGCCCCCTACGCCGAAGGCTGCGACAAAGAGGTGCCCGAGGTGGCCGAC  
JJ238-10 ATCGTACCGTACGCCCCCTACGCCGAAGGCTGCGACAAAGAGGTGCCCGAGGTGGCCGAC  
JJ238-24 ATCGTACCGTACGCCCCCTACGCCGAAGGCTGCGACAAAGAGGTGCCCGAGGTGGCCGAC  
JK2-10 ATCGTACCGTACGCCCCCTACGCCGAAGGCTGCGACAAAGAGGTGCCCGAGGTGGCCGAC  
JK4-1 ATCGTACCGTACGCCCCCTACGCCGAAGGCTGCGACAAAGAGGTGCCCGAGGTGGCCGAC  
JK143-11 ATCGTACCGTACGCCCCCTACGCCGAAGGCTGCGACAAAGAGGTGCCCGAGGTGGCCGAC  
JS581 ATCGTACCGTACGCCCCCTACGCCGAAGGCTGCGACAAAGAGGTGCCCGAGGTGGCCGAC  
JS584 ATCGTACCGTACGCCCCCTACGCCGAAGGCTGCGACAAAGAGGTGCCCGAGGTGGCCGAC  
JW160-1 ATCGTACCGTACGCCCCCTACGCCGAAGGCTGCGACAAAGAGGTGCCCGAGGTGGCCGAC  
LB100-1 ATCGTACCGTACGCCCCCTACGCCGAAGGCTGCGACAAAGAGGTGCCCGAGGTGGCCGAC  
LC80 ATCGTACCGTACGCCCCCTACGCCGAAGGCTGCGACAAAGAGGTGCCCGAGGTGGCCGAC  
LD71a ATCGTACCGTACGCCCCCTACGCCGAAGGCTGCGACAAAGAGGTGCCCGAGGTGGCCGAC  
LE20-1 ATCGTACCGTACGCCCCCTACGCCGAAGGCTGCGACAAAGAGGTGCCCGAGGTGGCCGAC  
LG115 ATCGTACCGTACGCCCCCTACGCCGAAGGCTGCGACAAAGAGGTGCCCGAGGTGGCCGAC  
LG117 ATCGTACCGTACGCCCCCTACGCCGAAGGCTGCGACAAAGAGGTGCCCGAGGTGGCCGAC  
LH37-1 ATCGTACCGTACGCCCCCTACGCCGAAGGCTGCGACAAAGAGGTGCCCGAGGTGGCCGAC  
LMG9322 ATCGTACCGTACGCCCCCTACGCCGAAGGCTGCGACAAAGAGGTGCCCGAGGTGGCCGAC  
NCPPB3562 ATCGTACCGTACGCCCCCTACGCCGAAGGCTGCGACAAAGAGGTGCCCGAGGTGGCCGAC  
NCPPB3607 ATCGTACCGTACGCCCCCTACGCCGAAGGCTGCGACAAAGAGGTGCCCGAGGTGGCCGAC  
NCPPB3608 ATCGTACCGTACGCCCCCTACGCCGAAGGCTGCGACAAAGAGGTGCCCGAGGTGGCCGAC  
X2003-3218 ATCGTACCGTACGCCCCCTACGCCGAAGGCTGCGACAAAGAGGTGCCCGAGGTGGCCGAC  
JF90-2 ATCGTACCGTACGCCCCCTACGCCGAAGGCTGCGACAAAGAGGTGCCCGAGGTGGCCGAC  
JM35 ATCGTACCGTACGCCCCCTACGCCGAAGGCTGCGACAAAGAGGTGCCCGAGGTGGCCGAC  
\*\*\*\*\*





|            |                 |
|------------|-----------------|
| LG97       | GCTCTGGTCCAGTGA |
| NCPPB3612  | GCTCTGGTCCAGTGA |
| C40        | GCTCTGGTCCAGTGA |
| CFBP2852   | GCTCTGGTCCAGTGA |
| CFBP2911   | GCTCTGGTCCAGTGA |
| FDC217     | GCTCTGGTCCAGTGA |
| FDC1083    | GCTCTGGTCCAGTGA |
| JF90-8     | GCTCTGGTCCAGTGA |
| JJ10-1     | GCTCTGGTCCAGTGA |
| JJ238-10   | GCTCTGGTCCAGTGA |
| JJ238-24   | GCTCTGGTCCAGTGA |
| JK2-10     | GCTCTGGTCCAGTGA |
| JK4-1      | GCTCTGGTCCAGTGA |
| JK143-11   | GCTCTGGTCCAGTGA |
| JS581      | GCTCTGGTCCAGTGA |
| JS584      | GCTCTGGTCCAGTGA |
| JW160-1    | GCTCTGGTCCAGTGA |
| LB100-1    | GCTCTGGTCCAGTGA |
| LC80       | GCTCTGGTCCAGTGA |
| LD71a      | GCTCTGGTCCAGTGA |
| LE20-1     | GCTCTGGTCCAGTGA |
| LG115      | GCTCTGGTCCAGTGA |
| LG117      | GCTCTGGTCCAGTGA |
| LH37-1     | GCTCTGGTCCAGTGA |
| LMG9322    | GCTCTGGTCCAGTGA |
| NCPPB3562  | GCTCTGGTCCAGTGA |
| NCPPB3607  | GCTCTGGTCCAGTGA |
| NCPPB3608  | GCTCTGGTCCAGTGA |
| X2003-3218 | GCTCTGGTCCAGTGA |
| JF90-2     | GCTCTGGTCCAGTGA |
| JM35       | GCTCTGGTCCAGTGA |
|            | *****           |

**Cas5 (Cascade/processing of the pre-crRNA transcripts)**













C40 CGCTTCTTCCGCGCACGCATGGTCGATGGCCAGGTCGAGGTGCCAGCGCCGGAAAAACGGT  
CFBP2852 CGCTTCTTCCGCGCACGCATGGTCGATGGCCAGGTCGAGGTGCCAGCGCCGGAAAAACGGT  
CFBP2911 CGCTTCTTCCGCGCACGCATGGTCGATGGCCAGGTCGAGGTGCCAGCGCCGGAAAAACGGT  
FDC217 CGCTTCTTCCGCGCACGCATGGTCGATGGCCAGGTCGAGGTGCCAGCGCCGGAAAAACGGT  
FDC1083 CGCTTCTTCCGCGCACGCATGGTCGATGGCCAGGTCGAGGTGCCAGCGCCGGAAAAACGGT  
JF90-2 CGCTTCTTCCGCGCACGCATGGTCGATGGCCAGGTCGAGGTGCCAGCGCCGGAAAAACGGT  
JF90-8 CGCTTCTTCCGCGCACGCATGGTCGATGGCCAGGTCGAGGTGCCAGCGCCGGAAAAACGGT  
JJ10-1 CGCTTCTTCCGCGCACGCATGGTCGATGGCCAGGTCGAGGTGCCAGCGCCGGAAAAACGGT  
JJ238-10 CGCTTCTTCCGCGCACGCATGGTCGATGGCCAGGTCGAGGTGCCAGCGCCGGAAAAACGGT  
JJ238-24 CGCTTCTTCCGCGCACGCATGGTCGATGGCCAGGTCGAGGTGCCAGCGCCGGAAAAACGGT  
JK2-10 CGCTTCTTCCGCGCACGCATGGTCGATGGCCAGGTCGAGGTGCCAGCGCCGGAAAAACGGT  
JK4-1 CGCTTCTTCCGCGCACGCATGGTCGATGGCCAGGTCGAGGTGCCAGCGCCGGAAAAACGGT  
JK48 CGCTTCTTCCGCGCACGCATGGTCGATGGCCAGGTCGAGGTGCCAGCGCCGGAAAAACGGT  
JK143-9 CGCTTCTTCCGCGCACGCATGGTCGATGGCCAGGTCGAGGTGCCAGCGCCGGAAAAACGGT  
JK143-11 CGCTTCTTCCGCGCACGCATGGTCGATGGCCAGGTCGAGGTGCCAGCGCCGGAAAAACGGT  
JM35 CGCTTCTTCCGCGCACGCATGGTCGATGGCCAGGTCGAGGTGCCAGCGCCGGAAAAACGGT  
JS581 CGCTTCTTCCGCGCACGCATGGTCGATGGCCAGGTCGAGGTGCCAGCGCCGGAAAAACGGT  
JS584 CGCTTCTTCCGCGCACGCATGGTCGATGGCCAGGTCGAGGTGCCAGCGCCGGAAAAACGGT  
JW160-1 CGCTTCTTCCGCGCACGCATGGTCGATGGCCAGGTCGAGGTGCCAGCGCCGGAAAAACGGT  
LB100-1 CGCTTCTTCCGCGCACGCATGGTCGATGGCCAGGTCGAGGTGCCAGCGCCGGAAAAACGGT  
LC80 CGCTTCTTCCGCGCACGCATGGTCGATGGCCAGGTCGAGGTGCCAGCGCCGGAAAAACGGT  
LD7-1 CGCTTCTTCCGCGCACGCATGGTCGATGGCCAGGTCGAGGTGCCAGCGCCGGAAAAACGGT  
LD71a CGCTTCTTCCGCGCACGCATGGTCGATGGCCAGGTCGAGGTGCCAGCGCCGGAAAAACGGT  
LE3-1 CGCTTCTTCCGCGCACGCATGGTCGATGGCCAGGTCGAGGTGCCAGCGCCGGAAAAACGGT  
LE20-1 CGCTTCTTCCGCGCACGCATGGTCGATGGCCAGGTCGAGGTGCCAGCGCCGGAAAAACGGT  
LG102 CGCTTCTTCCGCGCACGCATGGTCGATGGCCAGGTCGAGGTGCCAGCGCCGGAAAAACGGT  
LG117 CGCTTCTTCCGCGCACGCATGGTCGATGGCCAGGTCGAGGTGCCAGCGCCGGAAAAACGGT  
LH37-1 CGCTTCTTCCGCGCACGCATGGTCGATGGCCAGGTCGAGGTGCCAGCGCCGGAAAAACGGT  
LMG9322 CGCTTCTTCCGCGCACGCATGGTCGATGGCCAGGTCGAGGTGCCAGCGCCGGAAAAACGGT  
NCPPB3562 CGCTTCTTCCGCGCACGCATGGTCGATGGCCAGGTCGAGGTGCCAGCGCCGGAAAAACGGT  
NCPPB3607 CGCTTCTTCCGCGCACGCATGGTCGATGGCCAGGTCGAGGTGCCAGCGCCGGAAAAACGGT  
NCPPB3612 CGCTTCTTCCGCGCACGCATGGTCGATGGCCAGGTCGAGGTGCCAGCGCCGGAAAAACGGT  
LB302 CGCTTCTTCCGCGCACGCATGGTCGATGGCCAGGTCGAGGTGCCAGCGCCGGAAAAACGGT  
LG115 CGCTTCTTCCGCGCACGCATGGTCGATGGCCAGGTCGAGGTGCCAGCGCCGGAAAAACGGT  
NCPPB3608 CGCTTCTTCCGCGCACGCATGGTCGATGGCCAGGTCGAGGTGCCAGCGCCGGAAAAACGGT  
X2003-3218 CGCTTCTTCCGCGCACGCATGGTCGATGGCCAGGTCGAGGTGCCAGCGCCGGAAAAACGGT  
\*\*\*\*\*

C40 GGGGTGCGCGCATGA  
CFBP2852 GGGGTGCGCGCATGA  
CFBP2911 GGGGTGCGCGCATGA  
FDC217 GGGGTGCGCGCATGA  
FDC1083 GGGGTGCGCGCATGA  
JF90-2 GGGGTGCGCGCATGA  
JF90-8 GGGGTGCGCGCATGA  
JJ10-1 GGGGTGCGCGCATGA  
JJ238-10 GGGGTGCGCGCATGA  
JJ238-24 GGGGTGCGCGCATGA  
JK2-10 GGGGTGCGCGCATGA  
JK4-1 GGGGTGCGCGCATGA  
JK48 GGGGTGCGCGCATGA  
JK143-9 GGGGTGCGCGCATGA  
JK143-11 GGGGTGCGCGCATGA  
JM35 GGGGTGCGCGCATGA  
JS581 GGGGTGCGCGCATGA  
JS584 GGGGTGCGCGCATGA  
JW160-1 GGGGTGCGCGCATGA  
LB100-1 GGGGTGCGCGCATGA  
LC80 GGGGTGCGCGCATGA  
LD7-1 GGGGTGCGCGCATGA  
LD71a GGGGTGCGCGCATGA  
LE3-1 GGGGTGCGCGCATGA  
LE20-1 GGGGTGCGCGCATGA  
LG102 GGGGTGCGCGCATGA  
LG117 GGGGTGCGCGCATGA  
LH37-1 GGGGTGCGCGCATGA  
LMG9322 GGGGTGCGCGCATGA  
NCPPB3562 GGGGTGCGCGCATGA  
NCPPB3607 GGGGTGCGCGCATGA  
NCPPB3612 GGGGTGCGCGCATGA  
LB302 GGGGTGCGCGCATGA  
LG115 GGGGTGCGCGCATGA  
NCPPB3608 GGGGTGCGCGCATGA  
X2003-3218 GGGGTGCGCGCATGA  
\*\*\*\*\*

**Cas8c-Csd1 (Cascade)**

JJ238-24 ATGATCCTGTCCGCACCTTGCCGACTACTACCACCGGCTGCTGGACGATCCCACATCGGGG  
JK143-9 ATGATCCTGTCCGCACCTTGCCGACTACTACCACCGGCTGCTGGACGATCCCACATCGGGG  
JK143-11 ATGATCCTGTCCGCACCTTGCCGACTACTACCACCGGCTGCTGGACGATCCCACATCGGGG  
LD71a ATGATCCTGTCCGCACCTTGCCGACTACTACCACCGGCTGCTGGACGATCCCACATCGGGG  
C40 ATGATCCTGTCCGCACCTTGCCGACTACTACCACCGGCTGCTGGACGATCCCACATCGGGG  
NCPPB3612 ATGATCCTGTCCGCACCTTGCCGACTACTACCACCGGCTGCTGGACGATCCCACATCGGGG  
CFBP2852 ATGATCCTGTCCGCACCTTGCCGACTACTACCACCGGCTGCTGGACGATCCCACATCGGGG  
FDC217 ATGATCCTGTCCGCACCTTGCCGACTACTACCACCGGCTGCTGGACGATCCCACATCGGGG  
FDC1083 ATGATCCTGTCCGCACCTTGCCGACTACTACCACCGGCTGCTGGACGATCCCACATCGGGG  
JJ10-1 ATGATCCTGTCCGCACCTTGCCGACTACTACCACCGGCTGCTGGACGATCCCACATCGGGG  
JJ238-10 ATGATCCTGTCCGCACCTTGCCGACTACTACCACCGGCTGCTGGACGATCCCACATCGGGG  
JK4-1 ATGATCCTGTCCGCACCTTGCCGACTACTACCACCGGCTGCTGGACGATCCCACATCGGGG  
JW160-1 ATGATCCTGTCCGCACCTTGCCGACTACTACCACCGGCTGCTGGACGATCCCACATCGGGG  
LB100-1 ATGATCCTGTCCGCACCTTGCCGACTACTACCACCGGCTGCTGGACGATCCCACATCGGGG  
LC80 ATGATCCTGTCCGCACCTTGCCGACTACTACCACCGGCTGCTGGACGATCCCACATCGGGG  
LG117 ATGATCCTGTCCGCACCTTGCCGACTACTACCACCGGCTGCTGGACGATCCCACATCGGGG  
LH37-1 ATGATCCTGTCCGCACCTTGCCGACTACTACCACCGGCTGCTGGACGATCCCACATCGGGG  
LMG9322 ATGATCCTGTCCGCACCTTGCCGACTACTACCACCGGCTGCTGGACGATCCCACATCGGGG  
NCPPB3562 ATGATCCTGTCCGCACCTTGCCGACTACTACCACCGGCTGCTGGACGATCCCACATCGGGG  
CFBP2911 ATGATCCTGTCCGCACCTTGCCGACTACTACCACCGGCTGCTGGACGATCCCACATCGGGG  
JF90-2 ATGATCCTGTCCGCACCTTGCCGACTACTACCACCGGCTGCTGGACGATCCCACATCGGGG  
JK2-10 ATGATCCTGTCCGCACCTTGCCGACTACTACCACCGGCTGCTGGACGATCCCACATCGGGG  
JK48 ATGATCCTGTCCGCACCTTGCCGACTACTACCACCGGCTGCTGGACGATCCCACATCGGGG  
JM35 ATGATCCTGTCCGCACCTTGCCGACTACTACCACCGGCTGCTGGACGATCCCACATCGGGG  
JS581 ATGATCCTGTCCGCACCTTGCCGACTACTACCACCGGCTGCTGGACGATCCCACATCGGGG  
JS582 ATGATCCTGTCCGCACCTTGCCGACTACTACCACCGGCTGCTGGACGATCCCACATCGGGG  
JS584 ATGATCCTGTCCGCACCTTGCCGACTACTACCACCGGCTGCTGGACGATCCCACATCGGGG  
LB302 ATGATCCTGTCCGCACCTTGCCGACTACTACCACCGGCTGCTGGACGATCCCACATCGGGG  
LE20-1 ATGATCCTGTCCGCACCTTGCCGACTACTACCACCGGCTGCTGGACGATCCCACATCGGGG  
LG102 ATGATCCTGTCCGCACCTTGCCGACTACTACCACCGGCTGCTGGACGATCCCACATCGGGG  
LG115 ATGATCCTGTCCGCACCTTGCCGACTACTACCACCGGCTGCTGGACGATCCCACATCGGGG  
NCPPB3607 ATGATCCTGTCCGCACCTTGCCGACTACTACCACCGGCTGCTGGACGATCCCACATCGGGG  
NCPPB3608 ATGATCCTGTCCGCACCTTGCCGACTACTACCACCGGCTGCTGGACGATCCCACATCGGGG  
X2003-3218 ATGATCCTGTCCGCACCTTGCCGACTACTACCACCGGCTGCTGGACGATCCCACATCGGGG  
\*\*\*\*\*

JJ238-24 ATCGCCGCGCCCGGCTACAGCCAGGAGAAGATCGGCTACACCATCGTGTGGACGGCGGT  
JK143-9 ATCGCCGCGCCCGGCTACAGCCAGGAGAAGATCGGCTACACCATCGTGTGGACGGCGGT  
JK143-11 ATCGCCGCGCCCGGCTACAGCCAGGAGAAGATCGGCTACACCATCGTGTGGACGGCGGT  
LD71a ATCGCCGCGCCCGGCTACAGCCAGGAGAAGATCGGCTACACCATCGTGTGGACGGCGGT  
C40 ATCGCCGCGCCCGGCTACAGCCAGGAGAAGATCGGCTACACCATCGTGTGGACGGCGGT  
NCPPB3612 ATCGCCGCGCCCGGCTACAGCCAGGAGAAGATCGGCTACACCATCGTGTGGACGGCGGT  
CFBP2852 ATCGCCGCGCCCGGCTACAGCCAGGAGAAGATCGGCTACACCATCGTGTGGACGGCGGT  
FDC217 ATCGCCGCGCCCGGCTACAGCCAGGAGAAGATCGGCTACACCATCGTGTGGACGGCGGT  
FDC1083 ATCGCCGCGCCCGGCTACAGCCAGGAGAAGATCGGCTACACCATCGTGTGGACGGCGGT  
JJ10-1 ATCGCCGCGCCCGGCTACAGCCAGGAGAAGATCGGCTACACCATCGTGTGGACGGCGGT  
JJ238-10 ATCGCCGCGCCCGGCTACAGCCAGGAGAAGATCGGCTACACCATCGTGTGGACGGCGGT  
JK4-1 ATCGCCGCGCCCGGCTACAGCCAGGAGAAGATCGGCTACACCATCGTGTGGACGGCGGT  
JW160-1 ATCGCCGCGCCCGGCTACAGCCAGGAGAAGATCGGCTACACCATCGTGTGGACGGCGGT  
LB100-1 ATCGCCGCGCCCGGCTACAGCCAGGAGAAGATCGGCTACACCATCGTGTGGACGGCGGT  
LC80 ATCGCCGCGCCCGGCTACAGCCAGGAGAAGATCGGCTACACCATCGTGTGGACGGCGGT  
LG117 ATCGCCGCGCCCGGCTACAGCCAGGAGAAGATCGGCTACACCATCGTGTGGACGGCGGT  
LH37-1 ATCGCCGCGCCCGGCTACAGCCAGGAGAAGATCGGCTACACCATCGTGTGGACGGCGGT  
LMG9322 ATCGCCGCGCCCGGCTACAGCCAGGAGAAGATCGGCTACACCATCGTGTGGACGGCGGT  
NCPPB3562 ATCGCCGCGCCCGGCTACAGCCAGGAGAAGATCGGCTACACCATCGTGTGGACGGCGGT  
CFBP2911 ATCGCCGCGCCCGGCTACAGCCAGGAGAAGATCGGCTACACCATCGTGTGGACGGCGGT  
JF90-2 ATCGCCGCGCCCGGCTACAGCCAGGAGAAGATCGGCTACACCATCGTGTGGACGGCGGT  
JK2-10 ATCGCCGCGCCCGGCTACAGCCAGGAGAAGATCGGCTACACCATCGTGTGGACGGCGGT  
JK48 ATCGCCGCGCCCGGCTACAGCCAGGAGAAGATCGGCTACACCATCGTGTGGACGGCGGT  
JM35 ATCGCCGCGCCCGGCTACAGCCAGGAGAAGATCGGCTACACCATCGTGTGGACGGCGGT  
JS581 ATCGCCGCGCCCGGCTACAGCCAGGAGAAGATCGGCTACACCATCGTGTGGACGGCGGT  
JS582 ATCGCCGCGCCCGGCTACAGCCAGGAGAAGATCGGCTACACCATCGTGTGGACGGCGGT  
JS584 ATCGCCGCGCCCGGCTACAGCCAGGAGAAGATCGGCTACACCATCGTGTGGACGGCGGT  
LB302 ATCGCCGCGCCCGGCTACAGCCAGGAGAAGATCGGCTACACCATCGTGTGGACGGCGGT  
LE20-1 ATCGCCGCGCCCGGCTACAGCCAGGAGAAGATCGGCTACACCATCGTGTGGACGGCGGT  
LG102 ATCGCCGCGCCCGGCTACAGCCAGGAGAAGATCGGCTACACCATCGTGTGGACGGCGGT  
LG115 ATCGCCGCGCCCGGCTACAGCCAGGAGAAGATCGGCTACACCATCGTGTGGACGGCGGT  
NCPPB3607 ATCGCCGCGCCCGGCTACAGCCAGGAGAAGATCGGCTACACCATCGTGTGGACGGCGGT  
NCPPB3608 ATCGCCGCGCCCGGCTACAGCCAGGAGAAGATCGGCTACACCATCGTGTGGACGGCGGT  
X2003-3218 ATCGCCGCGCCCGGCTACAGCCAGGAGAAGATCGGCTACACCATCGTGTGGACGGCGGT  
\*\*\*\*\*

JJ238-24 GGCCGCGTTGTGGCCGTGGAGGACGAACATGACTACGACAGCAAGAAGCGAGTCGCCAAG  
JK143-9 GGCCGCGTTGTGGCCGTGGAGGACGAACATGACTACGACAGCAAGAAGCGAGTCGCCAAG  
JK143-11 GGCCGCGTTGTGGCCGTGGAGGACGAACATGACTACGACAGCAAGAAGCGAGTCGCCAAG  
LD71a GGCCGCGTTGTGGCCGTGGAGGACGAACATGACTACGACAGCAAGAAGCGAGTCGCCAAG  
C40 GGCCGCGTTGTGGCCGTGGAGGACGAACATGACTACGACAGCAAGAAGCGAGTCGCCAAG  
NCPPB3612 GGCCGCGTTGTGGCCGTGGAGGACGAACATGACTACGACAGCAAGAAGCGAGTCGCCAAG  
CFBP2852 GGCCGCGTTGTGGCCGTGGAGGACGAACATGACTACGACAGCAAGAAGCGAGTCGCCAAG  
FDC217 GGCCGCGTTGTGGCCGTGGAGGACGAACATGACTACGACAGCAAGAAGCGAGTCGCCAAG  
FDC1083 GGCCGCGTTGTGGCCGTGGAGGACGAACATGACTACGACAGCAAGAAGCGAGTCGCCAAG  
JJ10-1 GGCCGCGTTGTGGCCGTGGAGGACGAACATGACTACGACAGCAAGAAGCGAGTCGCCAAG  
JJ238-10 GGCCGCGTTGTGGCCGTGGAGGACGAACATGACTACGACAGCAAGAAGCGAGTCGCCAAG  
JK4-1 GGCCGCGTTGTGGCCGTGGAGGACGAACATGACTACGACAGCAAGAAGCGAGTCGCCAAG  
JW160-1 GGCCGCGTTGTGGCCGTGGAGGACGAACATGACTACGACAGCAAGAAGCGAGTCGCCAAG  
LB100-1 GGCCGCGTTGTGGCCGTGGAGGACGAACATGACTACGACAGCAAGAAGCGAGTCGCCAAG  
LC80 GGCCGCGTTGTGGCCGTGGAGGACGAACATGACTACGACAGCAAGAAGCGAGTCGCCAAG  
LG117 GGCCGCGTTGTGGCCGTGGAGGACGAACATGACTACGACAGCAAGAAGCGAGTCGCCAAG  
LH37-1 GGCCGCGTTGTGGCCGTGGAGGACGAACATGACTACGACAGCAAGAAGCGAGTCGCCAAG  
LMG9322 GGCCGCGTTGTGGCCGTGGAGGACGAACATGACTACGACAGCAAGAAGCGAGTCGCCAAG  
NCPPB3562 GGCCGCGTTGTGGCCGTGGAGGACGAACATGACTACGACAGCAAGAAGCGAGTCGCCAAG  
CFBP2911 GGCCGCGTTGTGGCCGTGGAGGACGAACATGACTACGACAGCAAGAAGCGAGTCGCCAAG  
JF90-2 GGCCGCGTTGTGGCCGTGGAGGACGAACATGACTACGACAGCAAGAAGCGAGTCGCCAAG  
JK2-10 GGCCGCGTTGTGGCCGTGGAGGACGAACATGACTACGACAGCAAGAAGCGAGTCGCCAAG  
JK48 GGCCGCGTTGTGGCCGTGGAGGACGAACATGACTACGACAGCAAGAAGCGAGTCGCCAAG  
JM35 GGCCGCGTTGTGGCCGTGGAGGACGAACATGACTACGACAGCAAGAAGCGAGTCGCCAAG  
JS581 GGCCGCGTTGTGGCCGTGGAGGACGAACATGACTACGACAGCAAGAAGCGAGTCGCCAAG  
JS582 GGCCGCGTTGTGGCCGTGGAGGACGAACATGACTACGACAGCAAGAAGCGAGTCGCCAAG  
JS584 GGCCGCGTTGTGGCCGTGGAGGACGAACATGACTACGACAGCAAGAAGCGAGTCGCCAAG  
LB302 GGCCGCGTTGTGGCCGTGGAGGACGAACATGACTACGACAGCAAGAAGCGAGTCGCCAAG  
LE20-1 GGCCGCGTTGTGGCCGTGGAGGACGAACATGACTACGACAGCAAGAAGCGAGTCGCCAAG  
LG102 GGCCGCGTTGTGGCCGTGGAGGACGAACATGACTACGACAGCAAGAAGCGAGTCGCCAAG  
LG115 GGCCGCGTTGTGGCCGTGGAGGACGAACATGACTACGACAGCAAGAAGCGAGTCGCCAAG  
NCPPB3607 GGCCGCGTTGTGGCCGTGGAGGACGAACATGACTACGACAGCAAGAAGCGAGTCGCCAAG  
NCPPB3608 GGCCGCGTTGTGGCCGTGGAGGACGAACATGACTACGACAGCAAGAAGCGAGTCGCCAAG  
X2003-3218 GGCCGCGTTGTGGCCGTGGAGGACGAACATGACTACGACAGCAAGAAGCGAGTCGCCAAG  
\*\*\*\*\*

JJ238-24 GCGCTGAGCGTGCCGACGCCGAGAGAAGCGCACCGTGGCGGTCAAGTCCAACCTTCTTTGG  
JK143-9 GCGCTGAGCGTGCCGACGCCGAGAGAAGCGCACCGTGGCGGTCAAGTCCAACCTTCTTTGG  
JK143-11 GCGCTGAGCGTGCCGACGCCGAGAGAAGCGCACCGTGGCGGTCAAGTCCAACCTTCTTTGG  
LD71a GCGCTGAGCGTGCCGACGCCGAGAGAAGCGCACCGTGGCGGTCAAGTCCAACCTTCTTTGG  
C40 GCGCTGAGCGTGCCGACGCCGAGAGAAGCGCACCGTGGCGGTCAAGTCCAACCTTCTTTGG  
NCPPB3612 GCGCTGAGCGTGCCGACGCCGAGAGAAGCGCACCGTGGCGGTCAAGTCCAACCTTCTTTGG  
CFBP2852 GCGCTGAGCGTGCCGACGCCGAGAGAAGCGCACCGTGGCGGTCAAGTCCAACCTTCTTTGG  
FDC217 GCGCTGAGCGTGCCGACGCCGAGAGAAGCGCACCGTGGCGGTCAAGTCCAACCTTCTTTGG  
FDC1083 GCGCTGAGCGTGCCGACGCCGAGAGAAGCGCACCGTGGCGGTCAAGTCCAACCTTCTTTGG  
JJ10-1 GCGCTGAGCGTGCCGACGCCGAGAGAAGCGCACCGTGGCGGTCAAGTCCAACCTTCTTTGG  
JJ238-10 GCGCTGAGCGTGCCGACGCCGAGAGAAGCGCACCGTGGCGGTCAAGTCCAACCTTCTTTGG  
JK4-1 GCGCTGAGCGTGCCGACGCCGAGAGAAGCGCACCGTGGCGGTCAAGTCCAACCTTCTTTGG  
JW160-1 GCGCTGAGCGTGCCGACGCCGAGAGAAGCGCACCGTGGCGGTCAAGTCCAACCTTCTTTGG  
LB100-1 GCGCTGAGCGTGCCGACGCCGAGAGAAGCGCACCGTGGCGGTCAAGTCCAACCTTCTTTGG  
LC80 GCGCTGAGCGTGCCGACGCCGAGAGAAGCGCACCGTGGCGGTCAAGTCCAACCTTCTTTGG  
LG117 GCGCTGAGCGTGCCGACGCCGAGAGAAGCGCACCGTGGCGGTCAAGTCCAACCTTCTTTGG  
LH37-1 GCGCTGAGCGTGCCGACGCCGAGAGAAGCGCACCGTGGCGGTCAAGTCCAACCTTCTTTGG  
LMG9322 GCGCTGAGCGTGCCGACGCCGAGAGAAGCGCACCGTGGCGGTCAAGTCCAACCTTCTTTGG  
NCPPB3562 GCGCTGAGCGTGCCGACGCCGAGAGAAGCGCACCGTGGCGGTCAAGTCCAACCTTCTTTGG  
CFBP2911 GCGCTGAGCGTGCCGACGCCGAGAGAAGCGCACCGTGGCGGTCAAGTCCAACCTTCTTTGG  
JF90-2 GCGCTGAGCGTGCCGACGCCGAGAGAAGCGCACCGTGGCGGTCAAGTCCAACCTTCTTTGG  
JK2-10 GCGCTGAGCGTGCCGACGCCGAGAGAAGCGCACCGTGGCGGTCAAGTCCAACCTTCTTTGG  
JK48 GCGCTGAGCGTGCCGACGCCGAGAGAAGCGCACCGTGGCGGTCAAGTCCAACCTTCTTTGG  
JM35 GCGCTGAGCGTGCCGACGCCGAGAGAAGCGCACCGTGGCGGTCAAGTCCAACCTTCTTTGG  
JS581 GCGCTGAGCGTGCCGACGCCGAGAGAAGCGCACCGTGGCGGTCAAGTCCAACCTTCTTTGG  
JS582 GCGCTGAGCGTGCCGACGCCGAGAGAAGCGCACCGTGGCGGTCAAGTCCAACCTTCTTTGG  
JS584 GCGCTGAGCGTGCCGACGCCGAGAGAAGCGCACCGTGGCGGTCAAGTCCAACCTTCTTTGG  
LB302 GCGCTGAGCGTGCCGACGCCGAGAGAAGCGCACCGTGGCGGTCAAGTCCAACCTTCTTTGG  
LE20-1 GCGCTGAGCGTGCCGACGCCGAGAGAAGCGCACCGTGGCGGTCAAGTCCAACCTTCTTTGG  
LG102 GCGCTGAGCGTGCCGACGCCGAGAGAAGCGCACCGTGGCGGTCAAGTCCAACCTTCTTTGG  
LG115 GCGCTGAGCGTGCCGACGCCGAGAGAAGCGCACCGTGGCGGTCAAGTCCAACCTTCTTTGG  
NCPPB3607 GCGCTGAGCGTGCCGACGCCGAGAGAAGCGCACCGTGGCGGTCAAGTCCAACCTTCTTTGG  
NCPPB3608 GCGCTGAGCGTGCCGACGCCGAGAGAAGCGCACCGTGGCGGTCAAGTCCAACCTTCTTTGG  
X2003-3218 GCGCTGAGCGTGCCGACGCCGAGAGAAGCGCACCGTGGCGGTCAAGTCCAACCTTCTTTGG  
\*\*\*\*\*

JJ238-24 GACAAGACCAGTACGCGCTGGGCGTCACTGCCAGCAGCAAGCGCAGCGCGCAGGAACAC  
JK143-9 GACAAGACCAGTACGCGCTGGGCGTCACTGCCAGCAGCAAGCGCAGCGCGCAGGAACAC  
JK143-11 GACAAGACCAGTACGCGCTGGGCGTCACTGCCAGCAGCAAGCGCAGCGCGCAGGAACAC  
LD71a GACAAGACCAGTACGCGCTGGGCGTCACTGCCAGCAGCAAGCGCAGCGCGCAGGAACAC  
C40 GACAAGACCAGTACGCGCTGGGCGTCACTGCCAGCAGCAAGCGCAGCGCGCAGGAACAC  
NCPPB3612 GACAAGACCAGTACGCGCTGGGCGTCACTGCCAGCAGCAAGCGCAGCGCGCAGGAACAC  
CFBP2852 GACAAGACCAGTACGCGCTGGGCGTCACTGCCAGCAGCAAGCGCAGCGCGCAGGAACAC  
FDC217 GACAAGACCAGTACGCGCTGGGCGTCACTGCCAGCAGCAAGCGCAGCGCGCAGGAACAC  
FDC1083 GACAAGACCAGTACGCGCTGGGCGTCACTGCCAGCAGCAAGCGCAGCGCGCAGGAACAC  
JJ10-1 GACAAGACCAGTACGCGCTGGGCGTCACTGCCAGCAGCAAGCGCAGCGCGCAGGAACAC  
JJ238-10 GACAAGACCAGTACGCGCTGGGCGTCACTGCCAGCAGCAAGCGCAGCGCGCAGGAACAC  
JK4-1 GACAAGACCAGTACGCGCTGGGCGTCACTGCCAGCAGCAAGCGCAGCGCGCAGGAACAC  
JW160-1 GACAAGACCAGTACGCGCTGGGCGTCACTGCCAGCAGCAAGCGCAGCGCGCAGGAACAC  
LB100-1 GACAAGACCAGTACGCGCTGGGCGTCACTGCCAGCAGCAAGCGCAGCGCGCAGGAACAC  
LC80 GACAAGACCAGTACGCGCTGGGCGTCACTGCCAGCAGCAAGCGCAGCGCGCAGGAACAC  
LG117 GACAAGACCAGTACGCGCTGGGCGTCACTGCCAGCAGCAAGCGCAGCGCGCAGGAACAC  
LH37-1 GACAAGACCAGTACGCGCTGGGCGTCACTGCCAGCAGCAAGCGCAGCGCGCAGGAACAC  
LMG9322 GACAAGACCAGTACGCGCTGGGCGTCACTGCCAGCAGCAAGCGCAGCGCGCAGGAACAC  
NCPPB3562 GACAAGACCAGTACGCGCTGGGCGTCACTGCCAGCAGCAAGCGCAGCGCGCAGGAACAC  
CFBP2911 GACAAGACCAGTACGCGCTGGGCGTCACTGCCAGCAGCAAGCGCAGCGCGCAGGAACAC  
JF90-2 GACAAGACCAGTACGCGCTGGGCGTCACTGCCAGCAGCAAGCGCAGCGCGCAGGAACAC  
JK2-10 GACAAGACCAGTACGCGCTGGGCGTCACTGCCAGCAGCAAGCGCAGCGCGCAGGAACAC  
JK48 GACAAGACCAGTACGCGCTGGGCGTCACTGCCAGCAGCAAGCGCAGCGCGCAGGAACAC  
JM35 GACAAGACCAGTACGCGCTGGGCGTCACTGCCAGCAGCAAGCGCAGCGCGCAGGAACAC  
JS581 GACAAGACCAGTACGCGCTGGGCGTCACTGCCAGCAGCAAGCGCAGCGCGCAGGAACAC  
JS582 GACAAGACCAGTACGCGCTGGGCGTCACTGCCAGCAGCAAGCGCAGCGCGCAGGAACAC  
JS584 GACAAGACCAGTACGCGCTGGGCGTCACTGCCAGCAGCAAGCGCAGCGCGCAGGAACAC  
LB302 GACAAGACCAGTACGCGCTGGGCGTCACTGCCAGCAGCAAGCGCAGCGCGCAGGAACAC  
LE20-1 GACAAGACCAGTACGCGCTGGGCGTCACTGCCAGCAGCAAGCGCAGCGCGCAGGAACAC  
LG102 GACAAGACCAGTACGCGCTGGGCGTCACTGCCAGCAGCAAGCGCAGCGCGCAGGAACAC  
LG115 GACAAGACCAGTACGCGCTGGGCGTCACTGCCAGCAGCAAGCGCAGCGCGCAGGAACAC  
NCPPB3607 GACAAGACCAGTACGCGCTGGGCGTCACTGCCAGCAGCAAGCGCAGCGCGCAGGAACAC  
NCPPB3608 GACAAGACCAGTACGCGCTGGGCGTCACTGCCAGCAGCAAGCGCAGCGCGCAGGAACAC  
X2003-3218 GACAAGACCAGTACGCGCTGGGCGTCACTGCCAGCAGCAAGCGCAGCGCGCAGGAACAC  
\*\*\*\*\*

JJ238-24 GCTGCATTCAAGACCTTGACACCAGCAGGCGCTCGGCGGCAGCGAAGACCCCGGGCTGCGT  
JK143-9 GCTGCATTCAAGACCTTGACACCAGCAGGCGCTCGGCGGCAGCGAAGACCCCGGGCTGCGT  
JK143-11 GCTGCATTCAAGACCTTGACACCAGCAGGCGCTCGGCGGCAGCGAAGACCCCGGGCTGCGT  
LD71a GCTGCATTCAAGACCTTGACACCAGCAGGCGCTCGGCGGCAGCGAAGACCCCGGGCTGCGT  
C40 GCTGCATTCAAGACCTTGACACCAGCAGGCGCTCGGCGGCAGCGAAGACCCCGGGCTGCGT  
NCPPB3612 GCTGCATTCAAGACCTTGACACCAGCAGGCGCTCGGCGGCAGCGAAGACCCCGGGCTGCGT  
CFBP2852 GCTGCATTCAAGACCTTGACACCAGCAGGCGCTCGGCGGCAGCGAAGACCCCGGGCTGCGT  
FDC217 GCTGCATTCAAGACCTTGACACCAGCAGGCGCTCGGCGGCAGCGAAGACCCCGGGCTGCGT  
FDC1083 GCTGCATTCAAGACCTTGACACCAGCAGGCGCTCGGCGGCAGCGAAGACCCCGGGCTGCGT  
JJ10-1 GCTGCATTCAAGACCTTGACACCAGCAGGCGCTCGGCGGCAGCGAAGACCCCGGGCTGCGT  
JJ238-10 GCTGCATTCAAGACCTTGACACCAGCAGGCGCTCGGCGGCAGCGAAGACCCCGGGCTGCGT  
JK4-1 GCTGCATTCAAGACCTTGACACCAGCAGGCGCTCGGCGGCAGCGAAGACCCCGGGCTGCGT  
JW160-1 GCTGCATTCAAGACCTTGACACCAGCAGGCGCTCGGCGGCAGCGAAGACCCCGGGCTGCGT  
LB100-1 GCTGCATTCAAGACCTTGACACCAGCAGGCGCTCGGCGGCAGCGAAGACCCCGGGCTGCGT  
LC80 GCTGCATTCAAGACCTTGACACCAGCAGGCGCTCGGCGGCAGCGAAGACCCCGGGCTGCGT  
LG117 GCTGCATTCAAGACCTTGACACCAGCAGGCGCTCGGCGGCAGCGAAGACCCCGGGCTGCGT  
LH37-1 GCTGCATTCAAGACCTTGACACCAGCAGGCGCTCGGCGGCAGCGAAGACCCCGGGCTGCGT  
LMG9322 GCTGCATTCAAGACCTTGACACCAGCAGGCGCTCGGCGGCAGCGAAGACCCCGGGCTGCGT  
NCPPB3562 GCTGCATTCAAGACCTTGACACCAGCAGGCGCTCGGCGGCAGCGAAGACCCCGGGCTGCGT  
CFBP2911 GCTGCATTCAAGACCTTGACACCAGCAGGCGCTCGGCGGCAGCGAAGACCCCGGGCTGCGT  
JF90-2 GCTGCATTCAAGACCTTGACACCAGCAGGCGCTCGGCGGCAGCGAAGACCCCGGGCTGCGT  
JK2-10 GCTGCATTCAAGACCTTGACACCAGCAGGCGCTCGGCGGCAGCGAAGACCCCGGGCTGCGT  
JK48 GCTGCATTCAAGACCTTGACACCAGCAGGCGCTCGGCGGCAGCGAAGACCCCGGGCTGCGT  
JM35 GCTGCATTCAAGACCTTGACACCAGCAGGCGCTCGGCGGCAGCGAAGACCCCGGGCTGCGT  
JS581 GCTGCATTCAAGACCTTGACACCAGCAGGCGCTCGGCGGCAGCGAAGACCCCGGGCTGCGT  
JS582 GCTGCATTCAAGACCTTGACACCAGCAGGCGCTCGGCGGCAGCGAAGACCCCGGGCTGCGT  
JS584 GCTGCATTCAAGACCTTGACACCAGCAGGCGCTCGGCGGCAGCGAAGACCCCGGGCTGCGT  
LB302 GCTGCATTCAAGACCTTGACACCAGCAGGCGCTCGGCGGCAGCGAAGACCCCGGGCTGCGT  
LE20-1 GCTGCATTCAAGACCTTGACACCAGCAGGCGCTCGGCGGCAGCGAAGACCCCGGGCTGCGT  
LG102 GCTGCATTCAAGACCTTGACACCAGCAGGCGCTCGGCGGCAGCGAAGACCCCGGGCTGCGT  
LG115 GCTGCATTCAAGACCTTGACACCAGCAGGCGCTCGGCGGCAGCGAAGACCCCGGGCTGCGT  
NCPPB3607 GCTGCATTCAAGACCTTGACACCAGCAGGCGCTCGGCGGCAGCGAAGACCCCGGGCTGCGT  
NCPPB3608 GCTGCATTCAAGACCTTGACACCAGCAGGCGCTCGGCGGCAGCGAAGACCCCGGGCTGCGT  
X2003-3218 GCTGCATTCAAGACCTTGACACCAGCAGGCGCTCGGCGGCAGCGAAGACCCCGGGCTGCGT  
\*\*\*\*\*



JJ238-24 GCGCTATTGACGTTCCCTCGACACTTGGTTCGCCCGCGCAATTCGCCGATCATCCACAGTTT  
JK143-9 GCGCTATTGACGTTCCCTCGACACTTGGTTCGCCCGCGCAATTCGCCGATCATCCACAGTTT  
JK143-11 GCGCTATTGACGTTCCCTCGACACTTGGTTCGCCCGCGCAATTCGCCGATCATCCACAGTTT  
LD71a GCGCTATTGACGTTCCCTCGACACTTGGTTCGCCCGCGCAATTCGCCGATCATCCACAGTTT  
C40 GCGCTATTGACGTTCCCTCGACACTTGGTTCGCCCGCGCAATTCGCCGATCATCCACAGTTT  
NCPPB3612 GCGCTATTGACGTTCCCTCGACACTTGGTTCGCCCGCGCAATTCGCCGATCATCCACAGTTT  
CFBP2852 GCGCTATTGACGTTCCCTCGACACTTGGTTCGCCCGCGCAATTCGCCGATCATCCACAGTTT  
FDC217 GCGCTATTGACGTTCCCTCGACACTTGGTTCGCCCGCGCAATTCGCCGATCATCCACAGTTT  
FDC1083 GCGCTATTGACGTTCCCTCGACACTTGGTTCGCCCGCGCAATTCGCCGATCATCCACAGTTT  
JJ10-1 GCGCTATTGACGTTCCCTCGACACTTGGTTCGCCCGCGCAATTCGCCGATCATCCACAGTTT  
JJ238-10 GCGCTATTGACGTTCCCTCGACACTTGGTTCGCCCGCGCAATTCGCCGATCATCCACAGTTT  
JK4-1 GCGCTATTGACGTTCCCTCGACACTTGGTTCGCCCGCGCAATTCGCCGATCATCCACAGTTT  
JW160-1 GCGCTATTGACGTTCCCTCGACACTTGGTTCGCCCGCGCAATTCGCCGATCATCCACAGTTT  
LB100-1 GCGCTATTGACGTTCCCTCGACACTTGGTTCGCCCGCGCAATTCGCCGATCATCCACAGTTT  
LC80 GCGCTATTGACGTTCCCTCGACACTTGGTTCGCCCGCGCAATTCGCCGATCATCCACAGTTT  
LG117 GCGCTATTGACGTTCCCTCGACACTTGGTTCGCCCGCGCAATTCGCCGATCATCCACAGTTT  
LH37-1 GCGCTATTGACGTTCCCTCGACACTTGGTTCGCCCGCGCAATTCGCCGATCATCCACAGTTT  
LMG9322 GCGCTATTGACGTTCCCTCGACACTTGGTTCGCCCGCGCAATTCGCCGATCATCCACAGTTT  
NCPPB3562 GCGCTATTGACGTTCCCTCGACACTTGGTTCGCCCGCGCAATTCGCCGATCATCCACAGTTT  
CFBP2911 GCGCTATTGACGTTCCCTCGACACTTGGTTCGCCCGCGCAATTCGCCGATCATCCACAGTTT  
JF90-2 GCGCTATTGACGTTCCCTCGACACTTGGTTCGCCCGCGCAATTCGCCGATCATCCACAGTTT  
JK2-10 GCGCTATTGACGTTCCCTCGACACTTGGTTCGCCCGCGCAATTCGCCGATCATCCACAGTTT  
JK48 GCGCTATTGACGTTCCCTCGACACTTGGTTCGCCCGCGCAATTCGCCGATCATCCACAGTTT  
JM35 GCGCTATTGACGTTCCCTCGACACTTGGTTCGCCCGCGCAATTCGCCGATCATCCACAGTTT  
JS581 GCGCTATTGACGTTCCCTCGACACTTGGTTCGCCCGCGCAATTCGCCGATCATCCACAGTTT  
JS582 GCGCTATTGACGTTCCCTCGACACTTGGTTCGCCCGCGCAATTCGCCGATCATCCACAGTTT  
JS584 GCGCTATTGACGTTCCCTCGACACTTGGTTCGCCCGCGCAATTCGCCGATCATCCACAGTTT  
LB302 GCGCTATTGACGTTCCCTCGACACTTGGTTCGCCCGCGCAATTCGCCGATCATCCACAGTTT  
LE20-1 GCGCTATTGACGTTCCCTCGACACTTGGTTCGCCCGCGCAATTCGCCGATCATCCACAGTTT  
LG102 GCGCTATTGACGTTCCCTCGACACTTGGTTCGCCCGCGCAATTCGCCGATCATCCACAGTTT  
LG115 GCGCTATTGACGTTCCCTCGACACTTGGTTCGCCCGCGCAATTCGCCGATCATCCACAGTTT  
NCPPB3607 GCGCTATTGACGTTCCCTCGACACTTGGTTCGCCCGCGCAATTCGCCGATCATCCACAGTTT  
NCPPB3608 GCGCTATTGACGTTCCCTCGACACTTGGTTCGCCCGCGCAATTCGCCGATCATCCACAGTTT  
X2003-3218 GCGCTATTGACGTTCCCTCGACACTTGGTTCGCCCGCGCAATTCGCCGATCATCCACAGTTT  
\*\*\*\*\*

JJ238-24 TCCCGTCACGGCGAGGCGCTATTGGATACCAACTGGTGTTCGCCCTGGAGGGCGACACC  
JK143-9 TCCCGTCACGGCGAGGCGCTATTGGATACCAACTGGTGTTCGCCCTGGAGGGCGACACC  
JK143-11 TCCCGTCACGGCGAGGCGCTATTGGATACCAACTGGTGTTCGCCCTGGAGGGCGACACC  
LD71a TCCCGTCACGGCGAGGCGCTATTGGATACCAACTGGTGTTCGCCCTGGAGGGCGACACC  
C40 TCCCGTCACGGCGAGGCGCTATTGGATACCAACTGGTGTTCGCCCTGGAGGGCGACACC  
NCPPB3612 TCCCGTCACGGCGAGGCGCTATTGGATACCAACTGGTGTTCGCCCTGGAGGGCGACACC  
CFBP2852 TCCCGTCACGGCGAGGCGCTATTGGATACCAACTGGTGTTCGCCCTGGAGGGCGACACC  
FDC217 TCCCGTCACGGCGAGGCGCTATTGGATACCAACTGGTGTTCGCCCTGGAGGGCGACACC  
FDC1083 TCCCGTCACGGCGAGGCGCTATTGGATACCAACTGGTGTTCGCCCTGGAGGGCGACACC  
JJ10-1 TCCCGTCACGGCGAGGCGCTATTGGATACCAACTGGTGTTCGCCCTGGAGGGCGACACC  
JJ238-10 TCCCGTCACGGCGAGGCGCTATTGGATACCAACTGGTGTTCGCCCTGGAGGGCGACACC  
JK4-1 TCCCGTCACGGCGAGGCGCTATTGGATACCAACTGGTGTTCGCCCTGGAGGGCGACACC  
JW160-1 TCCCGTCACGGCGAGGCGCTATTGGATACCAACTGGTGTTCGCCCTGGAGGGCGACACC  
LB100-1 TCCCGTCACGGCGAGGCGCTATTGGATACCAACTGGTGTTCGCCCTGGAGGGCGACACC  
LC80 TCCCGTCACGGCGAGGCGCTATTGGATACCAACTGGTGTTCGCCCTGGAGGGCGACACC  
LG117 TCCCGTCACGGCGAGGCGCTATTGGATACCAACTGGTGTTCGCCCTGGAGGGCGACACC  
LH37-1 TCCCGTCACGGCGAGGCGCTATTGGATACCAACTGGTGTTCGCCCTGGAGGGCGACACC  
LMG9322 TCCCGTCACGGCGAGGCGCTATTGGATACCAACTGGTGTTCGCCCTGGAGGGCGACACC  
NCPPB3562 TCCCGTCACGGCGAGGCGCTATTGGATACCAACTGGTGTTCGCCCTGGAGGGCGACACC  
CFBP2911 TCCCGTCACGGCGAGGCGCTATTGGATACCAACTGGTGTTCGCCCTGGAGGGCGACACC  
JF90-2 TCCCGTCACGGCGAGGCGCTATTGGATACCAACTGGTGTTCGCCCTGGAGGGCGACACC  
JK2-10 TCCCGTCACGGCGAGGCGCTATTGGATACCAACTGGTGTTCGCCCTGGAGGGCGACACC  
JK48 TCCCGTCACGGCGAGGCGCTATTGGATACCAACTGGTGTTCGCCCTGGAGGGCGACACC  
JM35 TCCCGTCACGGCGAGGCGCTATTGGATACCAACTGGTGTTCGCCCTGGAGGGCGACACC  
JS581 TCCCGTCACGGCGAGGCGCTATTGGATACCAACTGGTGTTCGCCCTGGAGGGCGACACC  
JS582 TCCCGTCACGGCGAGGCGCTATTGGATACCAACTGGTGTTCGCCCTGGAGGGCGACACC  
JS584 TCCCGTCACGGCGAGGCGCTATTGGATACCAACTGGTGTTCGCCCTGGAGGGCGACACC  
LB302 TCCCGTCACGGCGAGGCGCTATTGGATACCAACTGGTGTTCGCCCTGGAGGGCGACACC  
LE20-1 TCCCGTCACGGCGAGGCGCTATTGGATACCAACTGGTGTTCGCCCTGGAGGGCGACACC  
LG102 TCCCGTCACGGCGAGGCGCTATTGGATACCAACTGGTGTTCGCCCTGGAGGGCGACACC  
LG115 TCCCGTCACGGCGAGGCGCTATTGGATACCAACTGGTGTTCGCCCTGGAGGGCGACACC  
NCPPB3607 TCCCGTCACGGCGAGGCGCTATTGGATACCAACTGGTGTTCGCCCTGGAGGGCGACACC  
NCPPB3608 TCCCGTCACGGCGAGGCGCTATTGGATACCAACTGGTGTTCGCCCTGGAGGGCGACACC  
X2003-3218 TCCCGTCACGGCGAGGCGCTATTGGATACCAACTGGTGTTCGCCCTGGAGGGCGACACC  
\*\*\*\*\*

JJ238-24 GGCTATCTGCATCAGCGCGCCACGGCGCGCGGGGCATGGGAGCGACTGCA--AGGCCAAA  
JK143-9 GGCTATCTGCATCAGCGCGCCACGGCGCGCGGGGCATGGGAGCGACTGCA--AGGCCAAA  
JK143-11 GGCTATCTGCATCAGCGCGCCACGGCGCGCGGGGCATGGGAGCGACTGCA--AGGCCAAA  
LD71a GGCTATCTGCATCAGCGCGCCACGGCGCGCGGGGCATGGGAGCGACTGCA--AGGCCAAA  
C40 GGCTATCTGCATCAGCGCGCCACGGCGCGCGGGGCATGGGAGCGACTGCAAGAGGCCAAA  
NCPPB3612 GGCTATCTGCATCAGCGCGCCACGGCGCGCGGGGCATGGGAGCGACTGCAAGAGGCCAAA  
CFBP2852 GGCTATCTGCATCAGCGCGCCACGGCGCGCGGGGCATGGGAGCGACTGCAAGAGGCCAAA  
FDC217 GGCTATCTGCATCAGCGCGCCACGGCGCGCGGGGCATGGGAGCGACTGCAAGAGGCCAAA  
FDC1083 GGCTATCTGCATCAGCGCGCCACGGCGCGCGGGGCATGGGAGCGACTGCAAGAGGCCAAA  
JJ10-1 GGCTATCTGCATCAGCGCGCCACGGCGCGCGGGGCATGGGAGCGACTGCAAGAGGCCAAA  
JJ238-10 GGCTATCTGCATCAGCGCGCCACGGCGCGCGGGGCATGGGAGCGACTGCAAGAGGCCAAA  
JK4-1 GGCTATCTGCATCAGCGCGCCACGGCGCGCGGGGCATGGGAGCGACTGCAAGAGGCCAAA  
JW160-1 GGCTATCTGCATCAGCGCGCCACGGCGCGCGGGGCATGGGAGCGACTGCAAGAGGCCAAA  
LB100-1 GGCTATCTGCATCAGCGCGCCACGGCGCGCGGGGCATGGGAGCGACTGCAAGAGGCCAAA  
LC80 GGCTATCTGCATCAGCGCGCCACGGCGCGCGGGGCATGGGAGCGACTGCAAGAGGCCAAA  
LG117 GGCTATCTGCATCAGCGCGCCACGGCGCGCGGGGCATGGGAGCGACTGCAAGAGGCCAAA  
LH37-1 GGCTATCTGCATCAGCGCGCCACGGCGCGCGGGGCATGGGAGCGACTGCAAGAGGCCAAA  
LMG9322 GGCTATCTGCATCAGCGCGCCACGGCGCGCGGGGCATGGGAGCGACTGCAAGAGGCCAAA  
NCPPB3562 GGCTATCTGCATCAGCGCGCCACGGCGCGCGGGGCATGGGAGCGACTGCAAGAGGCCAAA  
CFBP2911 GGCTATCTGCATCAGCGCGCCACGGCGCGCGGGGCATGGGAGCGACTGCA--AGGCCAAA  
JF90-2 GGCTATCTGCATCAGCGCGCCACGGCGCGCGGGGCATGGGAGCGACTGCA--AGGCCAAA  
JK2-10 GGCTATCTGCATCAGCGCGCCACGGCGCGCGGGGCATGGGAGCGACTGCA--AGGCCAAA  
JK48 GGCTATCTGCATCAGCGCGCCACGGCGCGCGGGGCATGGGAGCGACTGCA--AGGCCAAA  
JM35 GGCTATCTGCATCAGCGCGCCACGGCGCGCGGGGCATGGGAGCGACTGCA--AGGCCAAA  
JS581 GGCTATCTGCATCAGCGCGCCACGGCGCGCGGGGCATGGGAGCGACTGCA--AGGCCAAA  
JS582 GGCTATCTGCATCAGCGCGCCACGGCGCGCGGGGCATGGGAGCGACTGCA--AGGCCAAA  
JS584 GGCTATCTGCATCAGCGCGCCACGGCGCGCGGGGCATGGGAGCGACTGCA--AGGCCAAA  
LB302 GGCTATCTGCATCAGCGCGCCACGGCGCGCGGGGCATGGGAGCGACTGCA--AGGCCAAA  
LE20-1 GGCTATCTGCATCAGCGCGCCACGGCGCGCGGGGCATGGGAGCGACTGCA--AGGCCAAA  
LG102 GGCTATCTGCATCAGCGCGCCACGGCGCGCGGGGCATGGGAGCGACTGCA--AGGCCAAA  
LG115 GGCTATCTGCATCAGCGCGCCACGGCGCGCGGGGCATGGGAGCGACTGCA--AGGCCAAA  
NCPPB3607 GGCTATCTGCATCAGCGCGCCACGGCGCGCGGGGCATGGGAGCGACTGCA--AGGCCAAA  
NCPPB3608 GGCTATCTGCATCAGCGCGCCACGGCGCGCGGGGCATGGGAGCGACTGCA--AGGCCAAA  
X2003-3218 GGCTATCTGCATCAGCGCGCCACGGCGCGCGGGGCATGGGAGCGACTGCA--AGGCCAAA  
\*\*\*\*\*

JJ238-24 GCGCCGACGGCGCATCCGGCATGTGCCCTGGTCACTGGCTTACGCGCGCCGTTGGCGCGGC  
JK143-9 GCGCCGACGGCGCATCCGGCATGTGCCCTGGTCACTGGCTTACGCGCGCCGTTGGCGCGGC  
JK143-11 GCGCCGACGGCGCATCCGGCATGTGCCCTGGTCACTGGCTTACGCGCGCCGTTGGCGCGGC  
LD71a GCGCCGACGGCGCATCCGGCATGTGCCCTGGTCACTGGCTTACGCGCGCCGTTGGCGCGGC  
C40 GCGCCGACGGCGCATCCGGCATGTGCCCTGGTCACTGGCTTACGCGCGCCGTTGGCGCGGC  
NCPPB3612 GCGCCGACGGCGCATCCGGCATGTGCCCTGGTCACTGGCTTACGCGCGCCGTTGGCGCGGC  
CFBP2852 GCGCCGACGGCGCATCCGGCATGTGCCCTGGTCACTGGCTTACGCGCGCCGTTGGCGCGGC  
FDC217 GCGCCGACGGCGCATCCGGCATGTGCCCTGGTCACTGGCTTACGCGCGCCGTTGGCGCGGC  
FDC1083 GCGCCGACGGCGCATCCGGCATGTGCCCTGGTCACTGGCTTACGCGCGCCGTTGGCGCGGC  
JJ10-1 GCGCCGACGGCGCATCCGGCATGTGCCCTGGTCACTGGCTTACGCGCGCCGTTGGCGCGGC  
JJ238-10 GCGCCGACGGCGCATCCGGCATGTGCCCTGGTCACTGGCTTACGCGCGCCGTTGGCGCGGC  
JK4-1 GCGCCGACGGCGCATCCGGCATGTGCCCTGGTCACTGGCTTACGCGCGCCGTTGGCGCGGC  
JW160-1 GCGCCGACGGCGCATCCGGCATGTGCCCTGGTCACTGGCTTACGCGCGCCGTTGGCGCGGC  
LB100-1 GCGCCGACGGCGCATCCGGCATGTGCCCTGGTCACTGGCTTACGCGCGCCGTTGGCGCGGC  
LC80 GCGCCGACGGCGCATCCGGCATGTGCCCTGGTCACTGGCTTACGCGCGCCGTTGGCGCGGC  
LG117 GCGCCGACGGCGCATCCGGCATGTGCCCTGGTCACTGGCTTACGCGCGCCGTTGGCGCGGC  
LH37-1 GCGCCGACGGCGCATCCGGCATGTGCCCTGGTCACTGGCTTACGCGCGCCGTTGGCGCGGC  
LMG9322 GCGCCGACGGCGCATCCGGCATGTGCCCTGGTCACTGGCTTACGCGCGCCGTTGGCGCGGC  
NCPPB3562 GCGCCGACGGCGCATCCGGCATGTGCCCTGGTCACTGGCTTACGCGCGCCGTTGGCGCGGC  
CFBP2911 GCGCCGACGGCGCATCCGGCATGTGCCCTGGTCACTGGCTTACGCGCGCCGTTGGCGCGGC  
JF90-2 GCGCCGACGGCGCATCCGGCATGTGCCCTGGTCACTGGCTTACGCGCGCCGTTGGCGCGGC  
JK2-10 GCGCCGACGGCGCATCCGGCATGTGCCCTGGTCACTGGCTTACGCGCGCCGTTGGCGCGGC  
JK48 GCGCCGACGGCGCATCCGGCATGTGCCCTGGTCACTGGCTTACGCGCGCCGTTGGCGCGGC  
JM35 GCGCCGACGGCGCATCCGGCATGTGCCCTGGTCACTGGCTTACGCGCGCCGTTGGCGCGGC  
JS581 GCGCCGACGGCGCATCCGGCATGTGCCCTGGTCACTGGCTTACGCGCGCCGTTGGCGCGGC  
JS582 GCGCCGACGGCGCATCCGGCATGTGCCCTGGTCACTGGCTTACGCGCGCCGTTGGCGCGGC  
JS584 GCGCCGACGGCGCATCCGGCATGTGCCCTGGTCACTGGCTTACGCGCGCCGTTGGCGCGGC  
LB302 GCGCCGACGGCGCATCCGGCATGTGCCCTGGTCACTGGCTTACGCGCGCCGTTGGCGCGGC  
LE20-1 GCGCCGACGGCGCATCCGGCATGTGCCCTGGTCACTGGCTTACGCGCGCCGTTGGCGCGGC  
LG102 GCGCCGACGGCGCATCCGGCATGTGCCCTGGTCACTGGCTTACGCGCGCCGTTGGCGCGGC  
LG115 GCGCCGACGGCGCATCCGGCATGTGCCCTGGTCACTGGCTTACGCGCGCCGTTGGCGCGGC  
NCPPB3607 GCGCCGACGGCGCATCCGGCATGTGCCCTGGTCACTGGCTTACGCGCGCCGTTGGCGCGGC  
NCPPB3608 GCGCCGACGGCGCATCCGGCATGTGCCCTGGTCACTGGCTTACGCGCGCCGTTGGCGCGGC  
X2003-3218 GCGCCGACGGCGCATCCGGCATGTGCCCTGGTCACTGGCTTACGCGCGCCGTTGGCGCGGC  
\*\*\*\*\*

JJ238-24 TGCACCCGCCGATCAAAGGATTTGAAAGCACGGGATCTTCCATCGTTTCTTTTAAACGCGG  
JK143-9 TGCACCCGCCGATCAAAGGATTTGAAAGCACGGGATCTTCCATCGTTTCTTTTAAACGCGG  
JK143-11 TGCACCCGCCGATCAAAGGATTTGAAAGCACGGGATCTTCCATCGTTTCTTTTAAACGCGG  
LD71a TGCACCCGCCGATCAAAGGATTTGAAAGCACGGGATCTTCCATCGTTTCTTTTAAACGCGG  
C40 TGCACCCGCCGATCAAAGGATTTGAAAGCACGGGATCTTCCATCGTTTCTTTTAAACGCGG  
NCPPB3612 TGCACCCGCCGATCAAAGGATTTGAAAGCACGGGATCTTCCATCGTTTCTTTTAAACGCGG  
CFBP2852 TGCACCCGCCGATCAAAGGATTTGAAAGCACGGGATCTTCCATCGTTTCTTTTAAACGCGG  
FDC217 TGCACCCGCCGATCAAAGGATTTGAAAGCACGGGATCTTCCATCGTTTCTTTTAAACGCGG  
FDC1083 TGCACCCGCCGATCAAAGGATTTGAAAGCACGGGATCTTCCATCGTTTCTTTTAAACGCGG  
JJ10-1 TGCACCCGCCGATCAAAGGATTTGAAAGCACGGGATCTTCCATCGTTTCTTTTAAACGCGG  
JJ238-10 TGCACCCGCCGATCAAAGGATTTGAAAGCACGGGATCTTCCATCGTTTCTTTTAAACGCGG  
JK4-1 TGCACCCGCCGATCAAAGGATTTGAAAGCACGGGATCTTCCATCGTTTCTTTTAAACGCGG  
JW160-1 TGCACCCGCCGATCAAAGGATTTGAAAGCACGGGATCTTCCATCGTTTCTTTTAAACGCGG  
LB100-1 TGCACCCGCCGATCAAAGGATTTGAAAGCACGGGATCTTCCATCGTTTCTTTTAAACGCGG  
LC80 TGCACCCGCCGATCAAAGGATTTGAAAGCACGGGATCTTCCATCGTTTCTTTTAAACGCGG  
LG117 TGCACCCGCCGATCAAAGGATTTGAAAGCACGGGATCTTCCATCGTTTCTTTTAAACGCGG  
LH37-1 TGCACCCGCCGATCAAAGGATTTGAAAGCACGGGATCTTCCATCGTTTCTTTTAAACGCGG  
LMG9322 TGCACCCGCCGATCAAAGGATTTGAAAGCACGGGATCTTCCATCGTTTCTTTTAAACGCGG  
NCPPB3562 TGCACCCGCCGATCAAAGGATTTGAAAGCACGGGATCTTCCATCGTTTCTTTTAAACGCGG  
CFBP2911 TGCACCCGCCGATCAAAGGATTTGAAAGCACGGGATCTTCCATCGTTTCTTTTAAACGCGG  
JF90-2 TGCACCCGCCGATCAAAGGATTTGAAAGCACGGGATCTTCCATCGTTTCTTTTAAACGCGG  
JK2-10 TGCACCCGCCGATCAAAGGATTTGAAAGCACGGGATCTTCCATCGTTTCTTTTAAACGCGG  
JK48 TGCACCCGCCGATCAAAGGATTTGAAAGCACGGGATCTTCCATCGTTTCTTTTAAACGCGG  
JM35 TGCACCCGCCGATCAAAGGATTTGAAAGCACGGGATCTTCCATCGTTTCTTTTAAACGCGG  
JS581 TGCACCCGCCGATCAAAGGATTTGAAAGCACGGGATCTTCCATCGTTTCTTTTAAACGCGG  
JS582 TGCACCCGCCGATCAAAGGATTTGAAAGCACGGGATCTTCCATCGTTTCTTTTAAACGCGG  
JS584 TGCACCCGCCGATCAAAGGATTTGAAAGCACGGGATCTTCCATCGTTTCTTTTAAACGCGG  
LB302 TGCACCCGCCGATCAAAGGATTTGAAAGCACGGGATCTTCCATCGTTTCTTTTAAACGCGG  
LE20-1 TGCACCCGCCGATCAAAGGATTTGAAAGCACGGGATCTTCCATCGTTTCTTTTAAACGCGG  
LG102 TGCACCCGCCGATCAAAGGATTTGAAAGCACGGGATCTTCCATCGTTTCTTTTAAACGCGG  
LG115 TGCACCCGCCGATCAAAGGATTTGAAAGCACGGGATCTTCCATCGTTTCTTTTAAACGCGG  
NCPPB3607 TGCACCCGCCGATCAAAGGATTTGAAAGCACGGGATCTTCCATCGTTTCTTTTAAACGCGG  
NCPPB3608 TGCACCCGCCGATCAAAGGATTTGAAAGCACGGGATCTTCCATCGTTTCTTTTAAACGCGG  
X2003-3218 TGCACCCGCCGATCAAAGGATTTGAAAGCACGGGATCTTCCATCGTTTCTTTTAAACGCGG  
\*\*\*\*\*

JJ238-24 ATGCTTATATTTTCATACAGAGGTTTCGCTCCTAAAAGTTCAGTCGAAACACAAGGAAAATG  
JK143-9 ATGCTTATATTTTCATACAGAGGTTTCGCTCCTAAAAGTTCAGTCGAAACACAAGGAAAATG  
JK143-11 ATGCTTATATTTTCATACAGAGGTTTCGCTCCTAAAAGTTCAGTCGAAACACAAGGAAAATG  
LD71a ATGCTTATATTTTCATACAGAGGTTTCGCTCCTAAAAGTTCAGTCGAAACACAAGGAAAATG  
C40 ATGCTTATATTTTCATACAGAGGTTTCGCTCCTAAAAGTTCAGTCGAAACACAAGGAAAATG  
NCPPB3612 ATGCTTATATTTTCATACAGAGGTTTCGCTCCTAAAAGTTCAGTCGAAACACAAGGAAAATG  
CFBP2852 ATGCTTATATTTTCATACAGAGGTTTCGCTCCTAAAAGTTCAGTCGAAACACAAGGAAAATG  
FDC217 ATGCTTATATTTTCATACAGAGGTTTCGCTCCTAAAAGTTCAGTCGAAACACAAGGAAAATG  
FDC1083 ATGCTTATATTTTCATACAGAGGTTTCGCTCCTAAAAGTTCAGTCGAAACACAAGGAAAATG  
JJ10-1 ATGCTTATATTTTCATACAGAGGTTTCGCTCCTAAAAGTTCAGTCGAAACACAAGGAAAATG  
JJ238-10 ATGCTTATATTTTCATACAGAGGTTTCGCTCCTAAAAGTTCAGTCGAAACACAAGGAAAATG  
JK4-1 ATGCTTATATTTTCATACAGAGGTTTCGCTCCTAAAAGTTCAGTCGAAACACAAGGAAAATG  
JW160-1 ATGCTTATATTTTCATACAGAGGTTTCGCTCCTAAAAGTTCAGTCGAAACACAAGGAAAATG  
LB100-1 ATGCTTATATTTTCATACAGAGGTTTCGCTCCTAAAAGTTCAGTCGAAACACAAGGAAAATG  
LC80 ATGCTTATATTTTCATACAGAGGTTTCGCTCCTAAAAGTTCAGTCGAAACACAAGGAAAATG  
LG117 ATGCTTATATTTTCATACAGAGGTTTCGCTCCTAAAAGTTCAGTCGAAACACAAGGAAAATG  
LH37-1 ATGCTTATATTTTCATACAGAGGTTTCGCTCCTAAAAGTTCAGTCGAAACACAAGGAAAATG  
LMG9322 ATGCTTATATTTTCATACAGAGGTTTCGCTCCTAAAAGTTCAGTCGAAACACAAGGAAAATG  
NCPPB3562 ATGCTTATATTTTCATACAGAGGTTTCGCTCCTAAAAGTTCAGTCGAAACACAAGGAAAATG  
CFBP2911 ATGCTTATATTTTCATACAGAGGTTTCGCTCCTAAAAGTTCAGTCGAAACACAAGGAAAATG  
JF90-2 ATGCTTATATTTTCATACAGAGGTTTCGCTCCTAAAAGTTCAGTCGAAACACAAGGAAAATG  
JK2-10 ATGCTTATATTTTCATACAGAGGTTTCGCTCCTAAAAGTTCAGTCGAAACACAAGGAAAATG  
JK48 ATGCTTATATTTTCATACAGAGGTTTCGCTCCTAAAAGTTCAGTCGAAACACAAGGAAAATG  
JM35 ATGCTTATATTTTCATACAGAGGTTTCGCTCCTAAAAGTTCAGTCGAAACACAAGGAAAATG  
JS581 ATGCTTATATTTTCATACAGAGGTTTCGCTCCTAAAAGTTCAGTCGAAACACAAGGAAAATG  
JS582 ATGCTTATATTTTCATACAGAGGTTTCGCTCCTAAAAGTTCAGTCGAAACACAAGGAAAATG  
JS584 ATGCTTATATTTTCATACAGAGGTTTCGCTCCTAAAAGTTCAGTCGAAACACAAGGAAAATG  
LB302 ATGCTTATATTTTCATACAGAGGTTTCGCTCCTAAAAGTTCAGTCGAAACACAAGGAAAATG  
LE20-1 ATGCTTATATTTTCATACAGAGGTTTCGCTCCTAAAAGTTCAGTCGAAACACAAGGAAAATG  
LG102 ATGCTTATATTTTCATACAGAGGTTTCGCTCCTAAAAGTTCAGTCGAAACACAAGGAAAATG  
LG115 ATGCTTATATTTTCATACAGAGGTTTCGCTCCTAAAAGTTCAGTCGAAACACAAGGAAAATG  
NCPPB3607 ATGCTTATATTTTCATACAGAGGTTTCGCTCCTAAAAGTTCAGTCGAAACACAAGGAAAATG  
NCPPB3608 ATGCTTATATTTTCATACAGAGGTTTCGCTCCTAAAAGTTCAGTCGAAACACAAGGAAAATG  
X2003-3218 ATGCTTATATTTTCATACAGAGGTTTCGCTCCTAAAAGTTCAGTCGAAACACAAGGAAAATG  
\*\*\*\*\*

JJ238-24 ATAGCGGTGCCAATGCGCCGATTTCTAAATCTGCGGCTTTCGCCTACACCACCGCGCTCA  
JK143-9 ATAGCGGTGCCAATGCGCCGATTTCTAAATCTGCGGCTTTCGCCTACACCACCGCGCTCA  
JK143-11 ATAGCGGTGCCAATGCGCCGATTTCTAAATCTGCGGCTTTCGCCTACACCACCGCGCTCA  
LD71a ATAGCGGTGCCAATGCGCCGATTTCTAAATCTGCGGCTTTCGCCTACACCACCGCGCTCA  
C40 ATAGCGGTGCCAATGCGCCGATTTCTAAATCTGCGGCTTTCGCCTACACCACCGCGCTCA  
NCPPB3612 ATAGCGGTGCCAATGCGCCGATTTCTAAATCTGCGGCTTTCGCCTACACCACCGCGCTCA  
CFBP2852 ATAGCGGTGCCAATGCGCCGATTTCTAAATCTGCGGCTTTCGCCTACACCACCGCGCTCA  
FDC217 ATAGCGGTGCCAATGCGCCGATTTCTAAATCTGCGGCTTTCGCCTACACCACCGCGCTCA  
FDC1083 ATAGCGGTGCCAATGCGCCGATTTCTAAATCTGCGGCTTTCGCCTACACCACCGCGCTCA  
JJ10-1 ATAGCGGTGCCAATGCGCCGATTTCTAAATCTGCGGCTTTCGCCTACACCACCGCGCTCA  
JJ238-10 ATAGCGGTGCCAATGCGCCGATTTCTAAATCTGCGGCTTTCGCCTACACCACCGCGCTCA  
JK4-1 ATAGCGGTGCCAATGCGCCGATTTCTAAATCTGCGGCTTTCGCCTACACCACCGCGCTCA  
JW160-1 ATAGCGGTGCCAATGCGCCGATTTCTAAATCTGCGGCTTTCGCCTACACCACCGCGCTCA  
LB100-1 ATAGCGGTGCCAATGCGCCGATTTCTAAATCTGCGGCTTTCGCCTACACCACCGCGCTCA  
LC80 ATAGCGGTGCCAATGCGCCGATTTCTAAATCTGCGGCTTTCGCCTACACCACCGCGCTCA  
LG117 ATAGCGGTGCCAATGCGCCGATTTCTAAATCTGCGGCTTTCGCCTACACCACCGCGCTCA  
LH37-1 ATAGCGGTGCCAATGCGCCGATTTCTAAATCTGCGGCTTTCGCCTACACCACCGCGCTCA  
LMG9322 ATAGCGGTGCCAATGCGCCGATTTCTAAATCTGCGGCTTTCGCCTACACCACCGCGCTCA  
NCPPB3562 ATAGCGGTGCCAATGCGCCGATTTCTAAATCTGCGGCTTTCGCCTACACCACCGCGCTCA  
CFBP2911 ATAGCGGTGCCAATGCGCCGATTTCTAAATCTGCGGCTTTCGCCTACACCACCGCGCTCA  
JF90-2 ATAGCGGTGCCAATGCGCCGATTTCTAAATCTGCGGCTTTCGCCTACACCACCGCGCTCA  
JK2-10 ATAGCGGTGCCAATGCGCCGATTTCTAAATCTGCGGCTTTCGCCTACACCACCGCGCTCA  
JK48 ATAGCGGTGCCAATGCGCCGATTTCTAAATCTGCGGCTTTCGCCTACACCACCGCGCTCA  
JM35 ATAGCGGTGCCAATGCGCCGATTTCTAAATCTGCGGCTTTCGCCTACACCACCGCGCTCA  
JS581 ATAGCGGTGCCAATGCGCCGATTTCTAAATCTGCGGCTTTCGCCTACACCACCGCGCTCA  
JS582 ATAGCGGTGCCAATGCGCCGATTTCTAAATCTGCGGCTTTCGCCTACACCACCGCGCTCA  
JS584 ATAGCGGTGCCAATGCGCCGATTTCTAAATCTGCGGCTTTCGCCTACACCACCGCGCTCA  
LB302 ATAGCGGTGCCAATGCGCCGATTTCTAAATCTGCGGCTTTCGCCTACACCACCGCGCTCA  
LE20-1 ATAGCGGTGCCAATGCGCCGATTTCTAAATCTGCGGCTTTCGCCTACACCACCGCGCTCA  
LG102 ATAGCGGTGCCAATGCGCCGATTTCTAAATCTGCGGCTTTCGCCTACACCACCGCGCTCA  
LG115 ATAGCGGTGCCAATGCGCCGATTTCTAAATCTGCGGCTTTCGCCTACACCACCGCGCTCA  
NCPPB3607 ATAGCGGTGCCAATGCGCCGATTTCTAAATCTGCGGCTTTCGCCTACACCACCGCGCTCA  
NCPPB3608 ATAGCGGTGCCAATGCGCCGATTTCTAAATCTGCGGCTTTCGCCTACACCACCGCGCTCA  
X2003-3218 ATAGCGGTGCCAATGCGCCGATTTCTAAATCTGCGGCTTTCGCCTACACCACCGCGCTCA  
\*\*\*\*\*

JJ238-24 ACCATCTGCTGCGCCGACCCACGCAATCGCCAACGTGTGCAGATCGGCGACACCACGG  
JK143-9 ACCATCTGCTGCGCCGACCCACGCAATCGCCAACGTGTGCAGATCGGCGACACCACGG  
JK143-11 ACCATCTGCTGCGCCGACCCACGCAATCGCCAACGTGTGCAGATCGGCGACACCACGG  
LD71a ACCATCTGCTGCGCCGACCCACGCAATCGCCAACGTGTGCAGATCGGCGACACCACGG  
C40 ACCATCTGCTGCGCCGACCCACGCAATCGCCAACGTGTGCAGATCGGCGACACCACGG  
NCPPB3612 ACCATCTGCTGCGCCGACCCACGCAATCGCCAACGTGTGCAGATCGGCGACACCACGG  
CFBP2852 ACCATCTGCTGCGCCGACCCACGCAATCGCCAACGTGTGCAGATCGGCGACACCACGG  
FDC217 ACCATCTGCTGCGCCGACCCACGCAATCGCCAACGTGTGCAGATCGGCGACACCACGG  
FDC1083 ACCATCTGCTGCGCCGACCCACGCAATCGCCAACGTGTGCAGATCGGCGACACCACGG  
JJ10-1 ACCATCTGCTGCGCCGACCCACGCAATCGCCAACGTGTGCAGATCGGCGACACCACGG  
JJ238-10 ACCATCTGCTGCGCCGACCCACGCAATCGCCAACGTGTGCAGATCGGCGACACCACGG  
JK4-1 ACCATCTGCTGCGCCGACCCACGCAATCGCCAACGTGTGCAGATCGGCGACACCACGG  
JW160-1 ACCATCTGCTGCGCCGACCCACGCAATCGCCAACGTGTGCAGATCGGCGACACCACGG  
LB100-1 ACCATCTGCTGCGCCGACCCACGCAATCGCCAACGTGTGCAGATCGGCGACACCACGG  
LC80 ACCATCTGCTGCGCCGACCCACGCAATCGCCAACGTGTGCAGATCGGCGACACCACGG  
LG117 ACCATCTGCTGCGCCGACCCACGCAATCGCCAACGTGTGCAGATCGGCGACACCACGG  
LH37-1 ACCATCTGCTGCGCCGACCCACGCAATCGCCAACGTGTGCAGATCGGCGACACCACGG  
LMG9322 ACCATCTGCTGCGCCGACCCACGCAATCGCCAACGTGTGCAGATCGGCGACACCACGG  
NCPPB3562 ACCATCTGCTGCGCCGACCCACGCAATCGCCAACGTGTGCAGATCGGCGACACCACGG  
CFBP2911 ACCATCTGCTGCGCCGACCCACGCAATCGCCAACGTGTGCAGATCGGCGACACCACGG  
JF90-2 ACCATCTGCTGCGCCGACCCACGCAATCGCCAACGTGTGCAGATCGGCGACACCACGG  
JK2-10 ACCATCTGCTGCGCCGACCCACGCAATCGCCAACGTGTGCAGATCGGCGACACCACGG  
JK48 ACCATCTGCTGCGCCGACCCACGCAATCGCCAACGTGTGCAGATCGGCGACACCACGG  
JM35 ACCATCTGCTGCGCCGACCCACGCAATCGCCAACGTGTGCAGATCGGCGACACCACGG  
JS581 ACCATCTGCTGCGCCGACCCACGCAATCGCCAACGTGTGCAGATCGGCGACACCACGG  
JS582 ACCATCTGCTGCGCCGACCCACGCAATCGCCAACGTGTGCAGATCGGCGACACCACGG  
JS584 ACCATCTGCTGCGCCGACCCACGCAATCGCCAACGTGTGCAGATCGGCGACACCACGG  
LB302 ACCATCTGCTGCGCCGACCCACGCAATCGCCAACGTGTGCAGATCGGCGACACCACGG  
LE20-1 ACCATCTGCTGCGCCGACCCACGCAATCGCCAACGTGTGCAGATCGGCGACACCACGG  
LG102 ACCATCTGCTGCGCCGACCCACGCAATCGCCAACGTGTGCAGATCGGCGACACCACGG  
LG115 ACCATCTGCTGCGCCGACCCACGCAATCGCCAACGTGTGCAGATCGGCGACACCACGG  
NCPPB3607 ACCATCTGCTGCGCCGACCCACGCAATCGCCAACGTGTGCAGATCGGCGACACCACGG  
NCPPB3608 ACCATCTGCTGCGCCGACCCACGCAATCGCCAACGTGTGCAGATCGGCGACACCACGG  
X2003-3218 ACCATCTGCTGCGCCGACCCACGCAATCGCCAACGTGTGCAGATCGGCGACACCACGG  
\*\*\*\*\*

JJ238-24 TGGTGTTC TGGGCGCAGGCCAGGACGACCGCGCACGCTGAGGAGGCCGAAGATCTGATCG  
JK143-9 TGGTGTTC TGGGCGCAGGCCAGGACGACCGCGCACGCTGAGGAGGCCGAAGATCTGATCG  
JK143-11 TGGTGTTC TGGGCGCAGGCCAGGACGACCGCGCACGCTGAGGAGGCCGAAGATCTGATCG  
LD71a TGGTGTTC TGGGCGCAGGCCAGGACGACCGCGCACGCTGAGGAGGCCGAAGATCTGATCG  
C40 TGGTGTTC TGGGCGCAGGCCAGGACGACCGCGCACGCTGAGGAGGCCGAAGATCTGATCG  
NCPPB3612 TGGTGTTC TGGGCGCAGGCCAGGACGACCGCGCACGCTGAGGAGGCCGAAGATCTGATCG  
CFBP2852 TGGTGTTC TGGGCGCAGGCCAGGACGACCGCGCACGCTGAGGAGGCCGAAGATCTGATCG  
FDC217 TGGTGTTC TGGGCGCAGGCCAGGACGACCGCGCACGCTGAGGAGGCCGAAGATCTGATCG  
FDC1083 TGGTGTTC TGGGCGCAGGCCAGGACGACCGCGCACGCTGAGGAGGCCGAAGATCTGATCG  
JJ10-1 TGGTGTTC TGGGCGCAGGCCAGGACGACCGCGCACGCTGAGGAGGCCGAAGATCTGATCG  
JJ238-10 TGGTGTTC TGGGCGCAGGCCAGGACGACCGCGCACGCTGAGGAGGCCGAAGATCTGATCG  
JK4-1 TGGTGTTC TGGGCGCAGGCCAGGACGACCGCGCACGCTGAGGAGGCCGAAGATCTGATCG  
JW160-1 TGGTGTTC TGGGCGCAGGCCAGGACGACCGCGCACGCTGAGGAGGCCGAAGATCTGATCG  
LB100-1 TGGTGTTC TGGGCGCAGGCCAGGACGACCGCGCACGCTGAGGAGGCCGAAGATCTGATCG  
LC80 TGGTGTTC TGGGCGCAGGCCAGGACGACCGCGCACGCTGAGGAGGCCGAAGATCTGATCG  
LG117 TGGTGTTC TGGGCGCAGGCCAGGACGACCGCGCACGCTGAGGAGGCCGAAGATCTGATCG  
LH37-1 TGGTGTTC TGGGCGCAGGCCAGGACGACCGCGCACGCTGAGGAGGCCGAAGATCTGATCG  
LMG9322 TGGTGTTC TGGGCGCAGGCCAGGACGACCGCGCACGCTGAGGAGGCCGAAGATCTGATCG  
NCPPB3562 TGGTGTTC TGGGCGCAGGCCAGGACGACCGCGCACGCTGAGGAGGCCGAAGATCTGATCG  
CFBP2911 TGGTGTTC TGGGCGCAGGCCAGGACGACCGCGCACGCTGAGGAGGCCGAAGATCTGATCG  
JF90-2 TGGTGTTC TGGGCGCAGGCCAGGACGACCGCGCACGCTGAGGAGGCCGAAGATCTGATCG  
JK2-10 TGGTGTTC TGGGCGCAGGCCAGGACGACCGCGCACGCTGAGGAGGCCGAAGATCTGATCG  
JK48 TGGTGTTC TGGGCGCAGGCCAGGACGACCGCGCACGCTGAGGAGGCCGAAGATCTGATCG  
JM35 TGGTGTTC TGGGCGCAGGCCAGGACGACCGCGCACGCTGAGGAGGCCGAAGATCTGATCG  
JS581 TGGTGTTC TGGGCGCAGGCCAGGACGACCGCGCACGCTGAGGAGGCCGAAGATCTGATCG  
JS582 TGGTGTTC TGGGCGCAGGCCAGGACGACCGCGCACGCTGAGGAGGCCGAAGATCTGATCG  
JS584 TGGTGTTC TGGGCGCAGGCCAGGACGACCGCGCACGCTGAGGAGGCCGAAGATCTGATCG  
LB302 TGGTGTTC TGGGCGCAGGCCAGGACGACCGCGCACGCTGAGGAGGCCGAAGATCTGATCG  
LE20-1 TGGTGTTC TGGGCGCAGGCCAGGACGACCGCGCACGCTGAGGAGGCCGAAGATCTGATCG  
LG102 TGGTGTTC TGGGCGCAGGCCAGGACGACCGCGCACGCTGAGGAGGCCGAAGATCTGATCG  
LG115 TGGTGTTC TGGGCGCAGGCCAGGACGACCGCGCACGCTGAGGAGGCCGAAGATCTGATCG  
NCPPB3607 TGGTGTTC TGGGCGCAGGCCAGGACGACCGCGCACGCTGAGGAGGCCGAAGATCTGATCG  
NCPPB3608 TGGTGTTC TGGGCGCAGGCCAGGACGACCGCGCACGCTGAGGAGGCCGAAGATCTGATCG  
X2003-3218 TGGTGTTC TGGGCGCAGGCCAGGACGACCGCGCACGCTGAGGAGGCCGAAGATCTGATCG  
\*\*\*\*\*

JJ238-24 CCGATTTCTGCGGGCGGTGAAACAGAAGGCCCTGGCATCGCCGACGGCCAGGCCACCC  
JK143-9 CCGATTTCTGCGGGCGGTGAAACAGAAGGCCCTGGCATCGCCGACGGCCAGGCCACCC  
JK143-11 CCGATTTCTGCGGGCGGTGAAACAGAAGGCCCTGGCATCGCCGACGGCCAGGCCACCC  
LD71a CCGATTTCTGCGGGCGGTGAAACAGAAGGCCCTGGCATCGCCGACGGCCAGGCCACCC  
C40 CCGATTTCTGCGGGCGGTGAAACAGAAGGCCCTGGCATCGCCGACGGCCAGGCCACCC  
NCPPB3612 CCGATTTCTGCGGGCGGTGAAACAGAAGGCCCTGGCATCGCCGACGGCCAGGCCACCC  
CFBP2852 CCGATTTCTGCGGGCGGTGAAACAGAAGGCCCTGGCATCGCCGACGGCCAGGCCACCC  
FDC217 CCGATTTCTGCGGGCGGTGAAACAGAAGGCCCTGGCATCGCCGACGGCCAGGCCACCC  
FDC1083 CCGATTTCTGCGGGCGGTGAAACAGAAGGCCCTGGCATCGCCGACGGCCAGGCCACCC  
JJ10-1 CCGATTTCTGCGGGCGGTGAAACAGAAGGCCCTGGCATCGCCGACGGCCAGGCCACCC  
JJ238-10 CCGATTTCTGCGGGCGGTGAAACAGAAGGCCCTGGCATCGCCGACGGCCAGGCCACCC  
JK4-1 CCGATTTCTGCGGGCGGTGAAACAGAAGGCCCTGGCATCGCCGACGGCCAGGCCACCC  
JW160-1 CCGATTTCTGCGGGCGGTGAAACAGAAGGCCCTGGCATCGCCGACGGCCAGGCCACCC  
LB100-1 CCGATTTCTGCGGGCGGTGAAACAGAAGGCCCTGGCATCGCCGACGGCCAGGCCACCC  
LC80 CCGATTTCTGCGGGCGGTGAAACAGAAGGCCCTGGCATCGCCGACGGCCAGGCCACCC  
LG117 CCGATTTCTGCGGGCGGTGAAACAGAAGGCCCTGGCATCGCCGACGGCCAGGCCACCC  
LH37-1 CCGATTTCTGCGGGCGGTGAAACAGAAGGCCCTGGCATCGCCGACGGCCAGGCCACCC  
LMG9322 CCGATTTCTGCGGGCGGTGAAACAGAAGGCCCTGGCATCGCCGACGGCCAGGCCACCC  
NCPPB3562 CCGATTTCTGCGGGCGGTGAAACAGAAGGCCCTGGCATCGCCGACGGCCAGGCCACCC  
CFBP2911 CCGATTTCTGCGGGCGGTGAAACAGAAGGCCCTGGCATCGCCGACGGCCAGGCCACCC  
JF90-2 CCGATTTCTGCGGGCGGTGAAACAGAAGGCCCTGGCATCGCCGACGGCCAGGCCACCC  
JK2-10 CCGATTTCTGCGGGCGGTGAAACAGAAGGCCCTGGCATCGCCGACGGCCAGGCCACCC  
JK48 CCGATTTCTGCGGGCGGTGAAACAGAAGGCCCTGGCATCGCCGACGGCCAGGCCACCC  
JM35 CCGATTTCTGCGGGCGGTGAAACAGAAGGCCCTGGCATCGCCGACGGCCAGGCCACCC  
JS581 CCGATTTCTGCGGGCGGTGAAACAGAAGGCCCTGGCATCGCCGACGGCCAGGCCACCC  
JS582 CCGATTTCTGCGGGCGGTGAAACAGAAGGCCCTGGCATCGCCGACGGCCAGGCCACCC  
JS584 CCGATTTCTGCGGGCGGTGAAACAGAAGGCCCTGGCATCGCCGACGGCCAGGCCACCC  
LB302 CCGATTTCTGCGGGCGGTGAAACAGAAGGCCCTGGCATCGCCGACGGCCAGGCCACCC  
LE20-1 CCGATTTCTGCGGGCGGTGAAACAGAAGGCCCTGGCATCGCCGACGGCCAGGCCACCC  
LG102 CCGATTTCTGCGGGCGGTGAAACAGAAGGCCCTGGCATCGCCGACGGCCAGGCCACCC  
LG115 CCGATTTCTGCGGGCGGTGAAACAGAAGGCCCTGGCATCGCCGACGGCCAGGCCACCC  
NCPPB3607 CCGATTTCTGCGGGCGGTGAAACAGAAGGCCCTGGCATCGCCGACGGCCAGGCCACCC  
NCPPB3608 CCGATTTCTGCGGGCGGTGAAACAGAAGGCCCTGGCATCGCCGACGGCCAGGCCACCC  
X2003-3218 CCGATTTCTGCGGGCGGTGAAACAGAAGGCCCTGGCATCGCCGACGGCCAGGCCACCC  
\*\*\*\*\*



JJ238-24 TGTCGATCCGCTTCTGGGAAACGCAGACGCTGGCCGGCTTTGCCGCACGGCTGGCTGCC  
JK143-9 TGTCGATCCGCTTCTGGGAAACGCAGACGCTGGCCGGCTTTGCCGCACGGCTGGCTGCC  
JK143-11 TGTCGATCCGCTTCTGGGAAACGCAGACGCTGGCCGGCTTTGCCGCACGGCTGGCTGCC  
LD71a TGTCGATCCGCTTCTGGGAAACGCAGACGCTGGCCGGCTTTGCCGCACGGCTGGCTGCC  
C40 TGTCGATCCGCTTCTGGGAAACGCAGACGCTGGCCGGCTTTGCCGCACGGCTGGCTGCC  
NCPPB3612 TGTCGATCCGCTTCTGGGAAACGCAGACGCTGGCCGGCTTTGCCGCACGGCTGGCTGCC  
CFBP2852 TGTCGATCCGCTTCTGGGAAACGCAGACGCTGGCCGGCTTTGCCGCACGGCTGGCTGCC  
FDC217 TGTCGATCCGCTTCTGGGAAACGCAGACGCTGGCCGGCTTTGCCGCACGGCTGGCTGCC  
FDC1083 TGTCGATCCGCTTCTGGGAAACGCAGACGCTGGCCGGCTTTGCCGCACGGCTGGCTGCC  
JJ10-1 TGTCGATCCGCTTCTGGGAAACGCAGACGCTGGCCGGCTTTGCCGCACGGCTGGCTGCC  
JJ238-10 TGTCGATCCGCTTCTGGGAAACGCAGACGCTGGCCGGCTTTGCCGCACGGCTGGCTGCC  
JK4-1 TGTCGATCCGCTTCTGGGAAACGCAGACGCTGGCCGGCTTTGCCGCACGGCTGGCTGCC  
JW160-1 TGTCGATCCGCTTCTGGGAAACGCAGACGCTGGCCGGCTTTGCCGCACGGCTGGCTGCC  
LB100-1 TGTCGATCCGCTTCTGGGAAACGCAGACGCTGGCCGGCTTTGCCGCACGGCTGGCTGCC  
LC80 TGTCGATCCGCTTCTGGGAAACGCAGACGCTGGCCGGCTTTGCCGCACGGCTGGCTGCC  
LG117 TGTCGATCCGCTTCTGGGAAACGCAGACGCTGGCCGGCTTTGCCGCACGGCTGGCTGCC  
LH37-1 TGTCGATCCGCTTCTGGGAAACGCAGACGCTGGCCGGCTTTGCCGCACGGCTGGCTGCC  
LMG9322 TGTCGATCCGCTTCTGGGAAACGCAGACGCTGGCCGGCTTTGCCGCACGGCTGGCTGCC  
NCPPB3562 TGTCGATCCGCTTCTGGGAAACGCAGACGCTGGCCGGCTTTGCCGCACGGCTGGCTGCC  
CFBP2911 TGTCGATCCGCTTCTGGGAAACGCAGACGCTGGCCGGCTTTGCCGCACGGCTGGCTGCC  
JF90-2 TGTCGATCCGCTTCTGGGAAACGCAGACGCTGGCCGGCTTTGCCGCACGGCTGGCTGCC  
JK2-10 TGTCGATCCGCTTCTGGGAAACGCAGACGCTGGCCGGCTTTGCCGCACGGCTGGCTGCC  
JK48 TGTCGATCCGCTTCTGGGAAACGCAGACGCTGGCCGGCTTTGCCGCACGGCTGGCTGCC  
JM35 TGTCGATCCGCTTCTGGGAAACGCAGACGCTGGCCGGCTTTGCCGCACGGCTGGCTGCC  
JS581 TGTCGATCCGCTTCTGGGAAACGCAGACGCTGGCCGGCTTTGCCGCACGGCTGGCTGCC  
JS582 TGTCGATCCGCTTCTGGGAAACGCAGACGCTGGCCGGCTTTGCCGCACGGCTGGCTGCC  
JS584 TGTCGATCCGCTTCTGGGAAACGCAGACGCTGGCCGGCTTTGCCGCACGGCTGGCTGCC  
LB302 TGTCGATCCGCTTCTGGGAAACGCAGACGCTGGCCGGCTTTGCCGCACGGCTGGCTGCC  
LE20-1 TGTCGATCCGCTTCTGGGAAACGCAGACGCTGGCCGGCTTTGCCGCACGGCTGGCTGCC  
LG102 TGTCGATCCGCTTCTGGGAAACGCAGACGCTGGCCGGCTTTGCCGCACGGCTGGCTGCC  
LG115 TGTCGATCCGCTTCTGGGAAACGCAGACGCTGGCCGGCTTTGCCGCACGGCTGGCTGCC  
NCPPB3607 TGTCGATCCGCTTCTGGGAAACGCAGACGCTGGCCGGCTTTGCCGCACGGCTGGCTGCC  
NCPPB3608 TGTCGATCCGCTTCTGGGAAACGCAGACGCTGGCCGGCTTTGCCGCACGGCTGGCTGCC  
X2003-3218 TGTCGATCCGCTTCTGGGAAACGCAGACGCTGGCCGGCTTTGCCGCACGGCTGGCTGCC  
\*\*\*\*\*

JJ238-24 ACTATCAGGACCTCAAGCTCGAGCCGCGCAGCTGGAAACGCGCGCTACCCCGAGTTTC  
JK143-9 ACTATCAGGACCTCAAGCTCGAGCCGCGCAGCTGGAAACGCGCGCTACCCCGAGTTTC  
JK143-11 ACTATCAGGACCTCAAGCTCGAGCCGCGCAGCTGGAAACGCGCGCTACCCCGAGTTTC  
LD71a ACTATCAGGACCTCAAGCTCGAGCCGCGCAGCTGGAAACGCGCGCTACCCCGAGTTTC  
C40 ACTATCAGGACCTCAAGCTCGAGCCGCGCAGCTGGAAACGCGCGCTACCCCGAGTTTC  
NCPPB3612 ACTATCAGGACCTCAAGCTCGAGCCGCGCAGCTGGAAACGCGCGCTACCCCGAGTTTC  
CFBP2852 ACTATCAGGACCTCAAGCTCGAGCCGCGCAGCTGGAAACGCGCGCTACCCCGAGTTTC  
FDC217 ACTATCAGGACCTCAAGCTCGAGCCGCGCAGCTGGAAACGCGCGCTACCCCGAGTTTC  
FDC1083 ACTATCAGGACCTCAAGCTCGAGCCGCGCAGCTGGAAACGCGCGCTACCCCGAGTTTC  
JJ10-1 ACTATCAGGACCTCAAGCTCGAGCCGCGCAGCTGGAAACGCGCGCTACCCCGAGTTTC  
JJ238-10 ACTATCAGGACCTCAAGCTCGAGCCGCGCAGCTGGAAACGCGCGCTACCCCGAGTTTC  
JK4-1 ACTATCAGGACCTCAAGCTCGAGCCGCGCAGCTGGAAACGCGCGCTACCCCGAGTTTC  
JW160-1 ACTATCAGGACCTCAAGCTCGAGCCGCGCAGCTGGAAACGCGCGCTACCCCGAGTTTC  
LB100-1 ACTATCAGGACCTCAAGCTCGAGCCGCGCAGCTGGAAACGCGCGCTACCCCGAGTTTC  
LC80 ACTATCAGGACCTCAAGCTCGAGCCGCGCAGCTGGAAACGCGCGCTACCCCGAGTTTC  
LG117 ACTATCAGGACCTCAAGCTCGAGCCGCGCAGCTGGAAACGCGCGCTACCCCGAGTTTC  
LH37-1 ACTATCAGGACCTCAAGCTCGAGCCGCGCAGCTGGAAACGCGCGCTACCCCGAGTTTC  
LMG9322 ACTATCAGGACCTCAAGCTCGAGCCGCGCAGCTGGAAACGCGCGCTACCCCGAGTTTC  
NCPPB3562 ACTATCAGGACCTCAAGCTCGAGCCGCGCAGCTGGAAACGCGCGCTACCCCGAGTTTC  
CFBP2911 ACTATCAGGACCTCAAGCTCGAGCCGCGCAGCTGGAAACGCGCGCTACCCCGAGTTTC  
JF90-2 ACTATCAGGACCTCAAGCTCGAGCCGCGCAGCTGGAAACGCGCGCTACCCCGAGTTTC  
JK2-10 ACTATCAGGACCTCAAGCTCGAGCCGCGCAGCTGGAAACGCGCGCTACCCCGAGTTTC  
JK48 ACTATCAGGACCTCAAGCTCGAGCCGCGCAGCTGGAAACGCGCGCTACCCCGAGTTTC  
JM35 ACTATCAGGACCTCAAGCTCGAGCCGCGCAGCTGGAAACGCGCGCTACCCCGAGTTTC  
JS581 ACTATCAGGACCTCAAGCTCGAGCCGCGCAGCTGGAAACGCGCGCTACCCCGAGTTTC  
JS582 ACTATCAGGACCTCAAGCTCGAGCCGCGCAGCTGGAAACGCGCGCTACCCCGAGTTTC  
JS584 ACTATCAGGACCTCAAGCTCGAGCCGCGCAGCTGGAAACGCGCGCTACCCCGAGTTTC  
LB302 ACTATCAGGACCTCAAGCTCGAGCCGCGCAGCTGGAAACGCGCGCTACCCCGAGTTTC  
LE20-1 ACTATCAGGACCTCAAGCTCGAGCCGCGCAGCTGGAAACGCGCGCTACCCCGAGTTTC  
LG102 ACTATCAGGACCTCAAGCTCGAGCCGCGCAGCTGGAAACGCGCGCTACCCCGAGTTTC  
LG115 ACTATCAGGACCTCAAGCTCGAGCCGCGCAGCTGGAAACGCGCGCTACCCCGAGTTTC  
NCPPB3607 ACTATCAGGACCTCAAGCTCGAGCCGCGCAGCTGGAAACGCGCGCTACCCCGAGTTTC  
NCPPB3608 ACTATCAGGACCTCAAGCTCGAGCCGCGCAGCTGGAAACGCGCGCTACCCCGAGTTTC  
X2003-3218 ACTATCAGGACCTCAAGCTCGAGCCGCGCAGCTGGAAACGCGCGCTACCCCGAGTTTC  
\*\*\*\*\*

JJ238-24 TCGCCCTGCAGACAGCGCCGGTCTACGGCGAGCACGGCAAGCCCAAGGCCGAGGACGTCT  
JK143-9 TCGCCCTGCAGACAGCGCCGGTCTACGGCGAGCACGGCAAGCCCAAGGCCGAGGACGTCT  
JK143-11 TCGCCCTGCAGACAGCGCCGGTCTACGGCGAGCACGGCAAGCCCAAGGCCGAGGACGTCT  
LD71a TCGCCCTGCAGACAGCGCCGGTCTACGGCGAGCACGGCAAGCCCAAGGCCGAGGACGTCT  
C40 TCGCCCTGCAGACAGCGCCGGTCTACGGCGAGCACGGCAAGCCCAAGGCCGAGGACGTCT  
NCPPB3612 TCGCCCTGCAGACAGCGCCGGTCTACGGCGAGCACGGCAAGCCCAAGGCCGAGGACGTCT  
CFBP2852 TCGCCCTGCAGACAGCGCCGGTCTACGGCGAGCACGGCAAGCCCAAGGCCGAGGACGTCT  
FDC217 TCGCCCTGCAGACAGCGCCGGTCTACGGCGAGCACGGCAAGCCCAAGGCCGAGGACGTCT  
FDC1083 TCGCCCTGCAGACAGCGCCGGTCTACGGCGAGCACGGCAAGCCCAAGGCCGAGGACGTCT  
JJ10-1 TCGCCCTGCAGACAGCGCCGGTCTACGGCGAGCACGGCAAGCCCAAGGCCGAGGACGTCT  
JJ238-10 TCGCCCTGCAGACAGCGCCGGTCTACGGCGAGCACGGCAAGCCCAAGGCCGAGGACGTCT  
JK4-1 TCGCCCTGCAGACAGCGCCGGTCTACGGCGAGCACGGCAAGCCCAAGGCCGAGGACGTCT  
JW160-1 TCGCCCTGCAGACAGCGCCGGTCTACGGCGAGCACGGCAAGCCCAAGGCCGAGGACGTCT  
LB100-1 TCGCCCTGCAGACAGCGCCGGTCTACGGCGAGCACGGCAAGCCCAAGGCCGAGGACGTCT  
LC80 TCGCCCTGCAGACAGCGCCGGTCTACGGCGAGCACGGCAAGCCCAAGGCCGAGGACGTCT  
LG117 TCGCCCTGCAGACAGCGCCGGTCTACGGCGAGCACGGCAAGCCCAAGGCCGAGGACGTCT  
LH37-1 TCGCCCTGCAGACAGCGCCGGTCTACGGCGAGCACGGCAAGCCCAAGGCCGAGGACGTCT  
LMG9322 TCGCCCTGCAGACAGCGCCGGTCTACGGCGAGCACGGCAAGCCCAAGGCCGAGGACGTCT  
NCPPB3562 TCGCCCTGCAGACAGCGCCGGTCTACGGCGAGCACGGCAAGCCCAAGGCCGAGGACGTCT  
CFBP2911 TCGCCCTGCAGACAGCGCCGGTCTACGGCGAGCACGGCAAGCCCAAGGCCGAGGACGTCT  
JF90-2 TCGCCCTGCAGACAGCGCCGGTCTACGGCGAGCACGGCAAGCCCAAGGCCGAGGACGTCT  
JK2-10 TCGCCCTGCAGACAGCGCCGGTCTACGGCGAGCACGGCAAGCCCAAGGCCGAGGACGTCT  
JK48 TCGCCCTGCAGACAGCGCCGGTCTACGGCGAGCACGGCAAGCCCAAGGCCGAGGACGTCT  
JM35 TCGCCCTGCAGACAGCGCCGGTCTACGGCGAGCACGGCAAGCCCAAGGCCGAGGACGTCT  
JS581 TCGCCCTGCAGACAGCGCCGGTCTACGGCGAGCACGGCAAGCCCAAGGCCGAGGACGTCT  
JS582 TCGCCCTGCAGACAGCGCCGGTCTACGGCGAGCACGGCAAGCCCAAGGCCGAGGACGTCT  
JS584 TCGCCCTGCAGACAGCGCCGGTCTACGGCGAGCACGGCAAGCCCAAGGCCGAGGACGTCT  
LB302 TCGCCCTGCAGACAGCGCCGGTCTACGGCGAGCACGGCAAGCCCAAGGCCGAGGACGTCT  
LE20-1 TCGCCCTGCAGACAGCGCCGGTCTACGGCGAGCACGGCAAGCCCAAGGCCGAGGACGTCT  
LG102 TCGCCCTGCAGACAGCGCCGGTCTACGGCGAGCACGGCAAGCCCAAGGCCGAGGACGTCT  
LG115 TCGCCCTGCAGACAGCGCCGGTCTACGGCGAGCACGGCAAGCCCAAGGCCGAGGACGTCT  
NCPPB3607 TCGCCCTGCAGACAGCGCCGGTCTACGGCGAGCACGGCAAGCCCAAGGCCGAGGACGTCT  
NCPPB3608 TCGCCCTGCAGACAGCGCCGGTCTACGGCGAGCACGGCAAGCCCAAGGCCGAGGACGTCT  
X2003-3218 TCGCCCTGCAGACAGCGCCGGTCTACGGCGAGCACGGCAAGCCCAAGGCCGAGGACGTCT  
\*\*\*\*\*

JJ238-24 CGCCGCTTCTGGCAGGGGAGCTGACCCGCGCCATCCTCGCCGGCACC CGCTATCCGCGCA  
JK143-9 CGCCGCTTCTGGCAGGGGAGCTGACCCGCGCCATCCTCGCCGGCACC CGCTATCCGCGCA  
JK143-11 CGCCGCTTCTGGCAGGGGAGCTGACCCGCGCCATCCTCGCCGGCACC CGCTATCCGCGCA  
LD71a CGCCGCTTCTGGCAGGGGAGCTGACCCGCGCCATCCTCGCCGGCACC CGCTATCCGCGCA  
C40 CGCCGCTTCTGGCAGGGGAGCTGACCCGCGCCATCCTCGCCGGCACC CGCTATCCGCGCA  
NCPPB3612 CGCCGCTTCTGGCAGGGGAGCTGACCCGCGCCATCCTCGCCGGCACC CGCTATCCGCGCA  
CFBP2852 CGCCGCTTCTGGCAGGGGAGCTGACCCGCGCCATCCTCGCCGGCACC CGCTATCCGCGCA  
FDC217 CGCCGCTTCTGGCAGGGGAGCTGACCCGCGCCATCCTCGCCGGCACC CGCTATCCGCGCA  
FDC1083 CGCCGCTTCTGGCAGGGGAGCTGACCCGCGCCATCCTCGCCGGCACC CGCTATCCGCGCA  
JJ10-1 CGCCGCTTCTGGCAGGGGAGCTGACCCGCGCCATCCTCGCCGGCACC CGCTATCCGCGCA  
JJ238-10 CGCCGCTTCTGGCAGGGGAGCTGACCCGCGCCATCCTCGCCGGCACC CGCTATCCGCGCA  
JK4-1 CGCCGCTTCTGGCAGGGGAGCTGACCCGCGCCATCCTCGCCGGCACC CGCTATCCGCGCA  
JW160-1 CGCCGCTTCTGGCAGGGGAGCTGACCCGCGCCATCCTCGCCGGCACC CGCTATCCGCGCA  
LB100-1 CGCCGCTTCTGGCAGGGGAGCTGACCCGCGCCATCCTCGCCGGCACC CGCTATCCGCGCA  
LC80 CGCCGCTTCTGGCAGGGGAGCTGACCCGCGCCATCCTCGCCGGCACC CGCTATCCGCGCA  
LG117 CGCCGCTTCTGGCAGGGGAGCTGACCCGCGCCATCCTCGCCGGCACC CGCTATCCGCGCA  
LH37-1 CGCCGCTTCTGGCAGGGGAGCTGACCCGCGCCATCCTCGCCGGCACC CGCTATCCGCGCA  
LMG9322 CGCCGCTTCTGGCAGGGGAGCTGACCCGCGCCATCCTCGCCGGCACC CGCTATCCGCGCA  
NCPPB3562 CGCCGCTTCTGGCAGGGGAGCTGACCCGCGCCATCCTCGCCGGCACC CGCTATCCGCGCA  
CFBP2911 CGCCGCTTCTGGCAGGGGAGCTGACCCGCGCCATCCTCGCCGGCACC CGCTATCCGCGCA  
JF90-2 CGCCGCTTCTGGCAGGGGAGCTGACCCGCGCCATCCTCGCCGGCACC CGCTATCCGCGCA  
JK2-10 CGCCGCTTCTGGCAGGGGAGCTGACCCGCGCCATCCTCGCCGGCACC CGCTATCCGCGCA  
JK48 CGCCGCTTCTGGCAGGGGAGCTGACCCGCGCCATCCTCGCCGGCACC CGCTATCCGCGCA  
JM35 CGCCGCTTCTGGCAGGGGAGCTGACCCGCGCCATCCTCGCCGGCACC CGCTATCCGCGCA  
JS581 CGCCGCTTCTGGCAGGGGAGCTGACCCGCGCCATCCTCGCCGGCACC CGCTATCCGCGCA  
JS582 CGCCGCTTCTGGCAGGGGAGCTGACCCGCGCCATCCTCGCCGGCACC CGCTATCCGCGCA  
JS584 CGCCGCTTCTGGCAGGGGAGCTGACCCGCGCCATCCTCGCCGGCACC CGCTATCCGCGCA  
LB302 CGCCGCTTCTGGCAGGGGAGCTGACCCGCGCCATCCTCGCCGGCACC CGCTATCCGCGCA  
LE20-1 CGCCGCTTCTGGCAGGGGAGCTGACCCGCGCCATCCTCGCCGGCACC CGCTATCCGCGCA  
LG102 CGCCGCTTCTGGCAGGGGAGCTGACCCGCGCCATCCTCGCCGGCACC CGCTATCCGCGCA  
LG115 CGCCGCTTCTGGCAGGGGAGCTGACCCGCGCCATCCTCGCCGGCACC CGCTATCCGCGCA  
NCPPB3607 CGCCGCTTCTGGCAGGGGAGCTGACCCGCGCCATCCTCGCCGGCACC CGCTATCCGCGCA  
NCPPB3608 CGCCGCTTCTGGCAGGGGAGCTGACCCGCGCCATCCTCGCCGGCACC CGCTATCCGCGCA  
X2003-3218 CGCCGCTTCTGGCAGGGGAGCTGACCCGCGCCATCCTCGCCGGCACC CGCTATCCGCGCA  
\*\*\*\*\*





JJ238-24 CATCCACCAAGGGAGAGCCCCCGTGAGTCTCGATACCGCCAATACCGACCCCGGCTACT  
JK143-9 CATCCACCAAGGGAGAGCCCCCGTGAGTCTCGATACCGCCAATACCGACCCCGGCTACT  
JK143-11 CATCCACCAAGGGAGAGCCCCCGTGAGTCTCGATACCGCCAATACCGACCCCGGCTACT  
LD71a CATCCACCAAGGGAGAGCCCCCGTGAGTCTCGATACCGCCAATACCGACCCCGGCTACT  
C40 CATCCACCAAGGGAGAGCCCCCGTGAGTCTCGATACCGCCAATACCGACCCCGGCTACT  
NCPPB3612 CATCCACCAAGGGAGAGCCCCCGTGAGTCTCGATACCGCCAATACCGACCCCGGCTACT  
CFBP2852 CATCCACCAAGGGAGAGCCCCCGTGAGTCTCGATACCGCCAATACCGACCCCGGCTACT  
FDC217 CATCCACCAAGGGAGAGCCCCCGTGAGTCTCGATACCGCCAATACCGACCCCGGCTACT  
FDC1083 CATCCACCAAGGGAGAGCCCCCGTGAGTCTCGATACCGCCAATACCGACCCCGGCTACT  
JJ10-1 CATCCACCAAGGGAGAGCCCCCGTGAGTCTCGATACCGCCAATACCGACCCCGGCTACT  
JJ238-10 CATCCACCAAGGGAGAGCCCCCGTGAGTCTCGATACCGCCAATACCGACCCCGGCTACT  
JK4-1 CATCCACCAAGGGAGAGCCCCCGTGAGTCTCGATACCGCCAATACCGACCCCGGCTACT  
JW160-1 CATCCACCAAGGGAGAGCCCCCGTGAGTCTCGATACCGCCAATACCGACCCCGGCTACT  
LB100-1 CATCCACCAAGGGAGAGCCCCCGTGAGTCTCGATACCGCCAATACCGACCCCGGCTACT  
LC80 CATCCACCAAGGGAGAGCCCCCGTGAGTCTCGATACCGCCAATACCGACCCCGGCTACT  
LG117 CATCCACCAAGGGAGAGCCCCCGTGAGTCTCGATACCGCCAATACCGACCCCGGCTACT  
LH37-1 CATCCACCAAGGGAGAGCCCCCGTGAGTCTCGATACCGCCAATACCGACCCCGGCTACT  
LMG9322 CATCCACCAAGGGAGAGCCCCCGTGAGTCTCGATACCGCCAATACCGACCCCGGCTACT  
NCPPB3562 CATCCACCAAGGGAGAGCCCCCGTGAGTCTCGATACCGCCAATACCGACCCCGGCTACT  
CFBP2911 CATCCACCAAGGGAGAGCCCCCGTGAGTCTCGATACCGCCAATACCGACCCCGGCTACT  
JF90-2 CATCCACCAAGGGAGAGCCCCCGTGAGTCTCGATACCGCCAATACCGACCCCGGCTACT  
JK2-10 CATCCACCAAGGGAGAGCCCCCGTGAGTCTCGATACCGCCAATACCGACCCCGGCTACT  
JK48 CATCCACCAAGGGAGAGCCCCCGTGAGTCTCGATACCGCCAATACCGACCCCGGCTACT  
JM35 CATCCACCAAGGGAGAGCCCCCGTGAGTCTCGATACCGCCAATACCGACCCCGGCTACT  
JS581 CATCCACCAAGGGAGAGCCCCCGTGAGTCTCGATACCGCCAATACCGACCCCGGCTACT  
JS582 CATCCACCAAGGGAGAGCCCCCGTGAGTCTCGATACCGCCAATACCGACCCCGGCTACT  
JS584 CATCCACCAAGGGAGAGCCCCCGTGAGTCTCGATACCGCCAATACCGACCCCGGCTACT  
LB302 CATCCACCAAGGGAGAGCCCCCGTGAGTCTCGATACCGCCAATACCGACCCCGGCTACT  
LE20-1 CATCCACCAAGGGAGAGCCCCCGTGAGTCTCGATACCGCCAATACCGACCCCGGCTACT  
LG102 CATCCACCAAGGGAGAGCCCCCGTGAGTCTCGATACCGCCAATACCGACCCCGGCTACT  
LG115 CATCCACCAAGGGAGAGCCCCCGTGAGTCTCGATACCGCCAATACCGACCCCGGCTACT  
NCPPB3607 CATCCACCAAGGGAGAGCCCCCGTGAGTCTCGATACCGCCAATACCGACCCCGGCTACT  
NCPPB3608 CATCCACCAAGGGAGAGCCCCCGTGAGTCTCGATACCGCCAATACCGACCCCGGCTACT  
X2003-3218 CATCCACCAAGGGAGAGCCCCCGTGAGTCTCGATACCGCCAATACCGACCCCGGCTACT  
\*\*\*\*\*

JJ238-24 TGCTGGGCCGGCTGTTCTCATCGCTGGAAAACCTGCAACGCACCGCACTGGGCGGGCAGG  
JK143-9 TGCTGGGCCGGCTGTTCTCATCGCTGGAAAACCTGCAACGCACCGCACTGGGCGGGCAGG  
JK143-11 TGCTGGGCCGGCTGTTCTCATCGCTGGAAAACCTGCAACGCACCGCACTGGGCGGGCAGG  
LD71a TGCTGGGCCGGCTGTTCTCATCGCTGGAAAACCTGCAACGCACCGCACTGGGCGGGCAGG  
C40 TGCTGGGCCGGCTGTTCTCATCGCTGGAAAACCTGCAACGCACCGCACTGGGCGGGCAGG  
NCPPB3612 TGCTGGGCCGGCTGTTCTCATCGCTGGAAAACCTGCAACGCACCGCACTGGGCGGGCAGG  
CFBP2852 TGCTGGGCCGGCTGTTCTCATCGCTGGAAAACCTGCAACGCACCGCACTGGGCGGGCAGG  
FDC217 TGCTGGGCCGGCTGTTCTCATCGCTGGAAAACCTGCAACGCACCGCACTGGGCGGGCAGG  
FDC1083 TGCTGGGCCGGCTGTTCTCATCGCTGGAAAACCTGCAACGCACCGCACTGGGCGGGCAGG  
JJ10-1 TGCTGGGCCGGCTGTTCTCATCGCTGGAAAACCTGCAACGCACCGCACTGGGCGGGCAGG  
JJ238-10 TGCTGGGCCGGCTGTTCTCATCGCTGGAAAACCTGCAACGCACCGCACTGGGCGGGCAGG  
JK4-1 TGCTGGGCCGGCTGTTCTCATCGCTGGAAAACCTGCAACGCACCGCACTGGGCGGGCAGG  
JW160-1 TGCTGGGCCGGCTGTTCTCATCGCTGGAAAACCTGCAACGCACCGCACTGGGCGGGCAGG  
LB100-1 TGCTGGGCCGGCTGTTCTCATCGCTGGAAAACCTGCAACGCACCGCACTGGGCGGGCAGG  
LC80 TGCTGGGCCGGCTGTTCTCATCGCTGGAAAACCTGCAACGCACCGCACTGGGCGGGCAGG  
LG117 TGCTGGGCCGGCTGTTCTCATCGCTGGAAAACCTGCAACGCACCGCACTGGGCGGGCAGG  
LH37-1 TGCTGGGCCGGCTGTTCTCATCGCTGGAAAACCTGCAACGCACCGCACTGGGCGGGCAGG  
LMG9322 TGCTGGGCCGGCTGTTCTCATCGCTGGAAAACCTGCAACGCACCGCACTGGGCGGGCAGG  
NCPPB3562 TGCTGGGCCGGCTGTTCTCATCGCTGGAAAACCTGCAACGCACCGCACTGGGCGGGCAGG  
CFBP2911 TGCTGGGCCGGCTGTTCTCATCGCTGGAAAACCTGCAACGCACCGCACTGGGCGGGCAGG  
JF90-2 TGCTGGGCCGGCTGTTCTCATCGCTGGAAAACCTGCAACGCACCGCACTGGGCGGGCAGG  
JK2-10 TGCTGGGCCGGCTGTTCTCATCGCTGGAAAACCTGCAACGCACCGCACTGGGCGGGCAGG  
JK48 TGCTGGGCCGGCTGTTCTCATCGCTGGAAAACCTGCAACGCACCGCACTGGGCGGGCAGG  
JM35 TGCTGGGCCGGCTGTTCTCATCGCTGGAAAACCTGCAACGCACCGCACTGGGCGGGCAGG  
JS581 TGCTGGGCCGGCTGTTCTCATCGCTGGAAAACCTGCAACGCACCGCACTGGGCGGGCAGG  
JS582 TGCTGGGCCGGCTGTTCTCATCGCTGGAAAACCTGCAACGCACCGCACTGGGCGGGCAGG  
JS584 TGCTGGGCCGGCTGTTCTCATCGCTGGAAAACCTGCAACGCACCGCACTGGGCGGGCAGG  
LB302 TGCTGGGCCGGCTGTTCTCATCGCTGGAAAACCTGCAACGCACCGCACTGGGCGGGCAGG  
LE20-1 TGCTGGGCCGGCTGTTCTCATCGCTGGAAAACCTGCAACGCACCGCACTGGGCGGGCAGG  
LG102 TGCTGGGCCGGCTGTTCTCATCGCTGGAAAACCTGCAACGCACCGCACTGGGCGGGCAGG  
LG115 TGCTGGGCCGGCTGTTCTCATCGCTGGAAAACCTGCAACGCACCGCACTGGGCGGGCAGG  
NCPPB3607 TGCTGGGCCGGCTGTTCTCATCGCTGGAAAACCTGCAACGCACCGCACTGGGCGGGCAGG  
NCPPB3608 TGCTGGGCCGGCTGTTCTCATCGCTGGAAAACCTGCAACGCACCGCACTGGGCGGGCAGG  
X2003-3218 TGCTGGGCCGGCTGTTCTCATCGCTGGAAAACCTGCAACGCACCGCACTGGGCGGGCAGG  
\*\*\*\*\*



JJ238-24 GCCTGGCGGTGAACCTGGAAAAAGAAGTCGGCCAGATCATCGACGCACTTCCCGCCAGCT  
JK143-9 GCCTGGCGGTGAACCTGGAAAAAGAAGTCGGCCAGATCATCGACGCACTTCCCGCCAGCT  
JK143-11 GCCTGGCGGTGAACCTGGAAAAAGAAGTCGGCCAGATCATCGACGCACTTCCCGCCAGCT  
LD71a GCCTGGCGGTGAACCTGGAAAAAGAAGTCGGCCAGATCATCGACGCACTTCCCGCCAGCT  
C40 GCCTGGCGGTGAACCTGGAAAAAGAAGTCGGCCAGATCATCGACGCACTTCCCGCCAGCT  
NCPPB3612 GCCTGGCGGTGAACCTGGAAAAAGAAGTCGGCCAGATCATCGACGCACTTCCCGCCAGCT  
CFBP2852 GCCTGGCGGTGAACCTGGAAAAAGAAGTCGGCCAGATCATCGACGCACTTCCCGCCAGCT  
FDC217 GCCTGGCGGTGAACCTGGAAAAAGAAGTCGGCCAGATCATCGACGCACTTCCCGCCAGCT  
FDC1083 GCCTGGCGGTGAACCTGGAAAAAGAAGTCGGCCAGATCATCGACGCACTTCCCGCCAGCT  
JJ10-1 GCCTGGCGGTGAACCTGGAAAAAGAAGTCGGCCAGATCATCGACGCACTTCCCGCCAGCT  
JJ238-10 GCCTGGCGGTGAACCTGGAAAAAGAAGTCGGCCAGATCATCGACGCACTTCCCGCCAGCT  
JK4-1 GCCTGGCGGTGAACCTGGAAAAAGAAGTCGGCCAGATCATCGACGCACTTCCCGCCAGCT  
JW160-1 GCCTGGCGGTGAACCTGGAAAAAGAAGTCGGCCAGATCATCGACGCACTTCCCGCCAGCT  
LB100-1 GCCTGGCGGTGAACCTGGAAAAAGAAGTCGGCCAGATCATCGACGCACTTCCCGCCAGCT  
LC80 GCCTGGCGGTGAACCTGGAAAAAGAAGTCGGCCAGATCATCGACGCACTTCCCGCCAGCT  
LG117 GCCTGGCGGTGAACCTGGAAAAAGAAGTCGGCCAGATCATCGACGCACTTCCCGCCAGCT  
LH37-1 GCCTGGCGGTGAACCTGGAAAAAGAAGTCGGCCAGATCATCGACGCACTTCCCGCCAGCT  
LMG9322 GCCTGGCGGTGAACCTGGAAAAAGAAGTCGGCCAGATCATCGACGCACTTCCCGCCAGCT  
NCPPB3562 GCCTGGCGGTGAACCTGGAAAAAGAAGTCGGCCAGATCATCGACGCACTTCCCGCCAGCT  
CFBP2911 GCCTGGCGGTGAACCTGGAAAAAGAAGTCGGCCAGATCATCGACGCACTTCCCGCCAGCT  
JF90-2 GCCTGGCGGTGAACCTGGAAAAAGAAGTCGGCCAGATCATCGACGCACTTCCCGCCAGCT  
JK2-10 GCCTGGCGGTGAACCTGGAAAAAGAAGTCGGCCAGATCATCGACGCACTTCCCGCCAGCT  
JK48 GCCTGGCGGTGAACCTGGAAAAAGAAGTCGGCCAGATCATCGACGCACTTCCCGCCAGCT  
JM35 GCCTGGCGGTGAACCTGGAAAAAGAAGTCGGCCAGATCATCGACGCACTTCCCGCCAGCT  
JS581 GCCTGGCGGTGAACCTGGAAAAAGAAGTCGGCCAGATCATCGACGCACTTCCCGCCAGCT  
JS582 GCCTGGCGGTGAACCTGGAAAAAGAAGTCGGCCAGATCATCGACGCACTTCCCGCCAGCT  
JS584 GCCTGGCGGTGAACCTGGAAAAAGAAGTCGGCCAGATCATCGACGCACTTCCCGCCAGCT  
LB302 GCCTGGCGGTGAACCTGGAAAAAGAAGTCGGCCAGATCATCGACGCACTTCCCGCCAGCT  
LE20-1 GCCTGGCGGTGAACCTGGAAAAAGAAGTCGGCCAGATCATCGACGCACTTCCCGCCAGCT  
LG102 GCCTGGCGGTGAACCTGGAAAAAGAAGTCGGCCAGATCATCGACGCACTTCCCGCCAGCT  
LG115 GCCTGGCGGTGAACCTGGAAAAAGAAGTCGGCCAGATCATCGACGCACTTCCCGCCAGCT  
NCPPB3607 GCCTGGCGGTGAACCTGGAAAAAGAAGTCGGCCAGATCATCGACGCACTTCCCGCCAGCT  
NCPPB3608 GCCTGGCGGTGAACCTGGAAAAAGAAGTCGGCCAGATCATCGACGCACTTCCCGCCAGCT  
X2003-3218 GCCTGGCGGTGAACCTGGAAAAAGAAGTCGGCCAGATCATCGACGCACTTCCCGCCAGCT  
\*\*\*\*\*

JJ238-24 TCCCGCGCAGCCTGCCATCCACGAGCAAGGCCGTTTCGCCATCGGTTACTACCACCAGA  
JK143-9 TCCCGCGCAGCCTGCCATCCACGAGCAAGGCCGTTTCGCCATCGGTTACTACCACCAGA  
JK143-11 TCCCGCGCAGCCTGCCATCCACGAGCAAGGCCGTTTCGCCATCGGTTACTACCACCAGA  
LD71a TCCCGCGCAGCCTGCCATCCACGAGCAAGGCCGTTTCGCCATCGGTTACTACCACCAGA  
C40 TCCCGCGCAGCCTGCCATCCACGAGCAAGGCCGTTTCGCCATCGGTTACTACCACCAGA  
NCPPB3612 TCCCGCGCAGCCTGCCATCCACGAGCAAGGCCGTTTCGCCATCGGTTACTACCACCAGA  
CFBP2852 TCCCGCGCAGCCTGCCATCCACGAGCAAGGCCGTTTCGCCATCGGTTACTACCACCAGA  
FDC217 TCCCGCGCAGCCTGCCATCCACGAGCAAGGCCGTTTCGCCATCGGTTACTACCACCAGA  
FDC1083 TCCCGCGCAGCCTGCCATCCACGAGCAAGGCCGTTTCGCCATCGGTTACTACCACCAGA  
JJ10-1 TCCCGCGCAGCCTGCCATCCACGAGCAAGGCCGTTTCGCCATCGGTTACTACCACCAGA  
JJ238-10 TCCCGCGCAGCCTGCCATCCACGAGCAAGGCCGTTTCGCCATCGGTTACTACCACCAGA  
JK4-1 TCCCGCGCAGCCTGCCATCCACGAGCAAGGCCGTTTCGCCATCGGTTACTACCACCAGA  
JW160-1 TCCCGCGCAGCCTGCCATCCACGAGCAAGGCCGTTTCGCCATCGGTTACTACCACCAGA  
LB100-1 TCCCGCGCAGCCTGCCATCCACGAGCAAGGCCGTTTCGCCATCGGTTACTACCACCAGA  
LC80 TCCCGCGCAGCCTGCCATCCACGAGCAAGGCCGTTTCGCCATCGGTTACTACCACCAGA  
LG117 TCCCGCGCAGCCTGCCATCCACGAGCAAGGCCGTTTCGCCATCGGTTACTACCACCAGA  
LH37-1 TCCCGCGCAGCCTGCCATCCACGAGCAAGGCCGTTTCGCCATCGGTTACTACCACCAGA  
LMG9322 TCCCGCGCAGCCTGCCATCCACGAGCAAGGCCGTTTCGCCATCGGTTACTACCACCAGA  
NCPPB3562 TCCCGCGCAGCCTGCCATCCACGAGCAAGGCCGTTTCGCCATCGGTTACTACCACCAGA  
CFBP2911 TCCCGCGCAGCCTGCCATCCACGAGCAAGGCCGTTTCGCCATCGGTTACTACCACCAGA  
JF90-2 TCCCGCGCAGCCTGCCATCCACGAGCAAGGCCGTTTCGCCATCGGTTACTACCACCAGA  
JK2-10 TCCCGCGCAGCCTGCCATCCACGAGCAAGGCCGTTTCGCCATCGGTTACTACCACCAGA  
JK48 TCCCGCGCAGCCTGCCATCCACGAGCAAGGCCGTTTCGCCATCGGTTACTACCACCAGA  
JM35 TCCCGCGCAGCCTGCCATCCACGAGCAAGGCCGTTTCGCCATCGGTTACTACCACCAGA  
JS581 TCCCGCGCAGCCTGCCATCCACGAGCAAGGCCGTTTCGCCATCGGTTACTACCACCAGA  
JS582 TCCCGCGCAGCCTGCCATCCACGAGCAAGGCCGTTTCGCCATCGGTTACTACCACCAGA  
JS584 TCCCGCGCAGCCTGCCATCCACGAGCAAGGCCGTTTCGCCATCGGTTACTACCACCAGA  
LB302 TCCCGCGCAGCCTGCCATCCACGAGCAAGGCCGTTTCGCCATCGGTTACTACCACCAGA  
LE20-1 TCCCGCGCAGCCTGCCATCCACGAGCAAGGCCGTTTCGCCATCGGTTACTACCACCAGA  
LG102 TCCCGCGCAGCCTGCCATCCACGAGCAAGGCCGTTTCGCCATCGGTTACTACCACCAGA  
LG115 TCCCGCGCAGCCTGCCATCCACGAGCAAGGCCGTTTCGCCATCGGTTACTACCACCAGA  
NCPPB3607 TCCCGCGCAGCCTGCCATCCACGAGCAAGGCCGTTTCGCCATCGGTTACTACCACCAGA  
NCPPB3608 TCCCGCGCAGCCTGCCATCCACGAGCAAGGCCGTTTCGCCATCGGTTACTACCACCAGA  
X2003-3218 TCCCGCGCAGCCTGCCATCCACGAGCAAGGCCGTTTCGCCATCGGTTACTACCACCAGA  
\*\*\*\*\*

JJ238-24 CCCAGGCGCGCTTCGCCCGCAACAACGGCCAGGACGCCCCGACACCGCTTCCGAAGGAG  
JK143-9 CCCAGGCGCGCTTCGCCCGCAACAACGGCCAGGACGCCCCGACACCGCTTCCGAAGGAG  
JK143-11 CCCAGGCGCGCTTCGCCCGCAACAACGGCCAGGACGCCCCGACACCGCTTCCGAAGGAG  
LD71a CCCAGGCGCGCTTCGCCCGCAACAACGGCCAGGACGCCCCGACACCGCTTCCGAAGGAG  
C40 CCCAGGCGCGCTTCGCCCGCAACAACGGCCAGGACGCCCCGACACCGCTTCCGAAGGAG  
NCPPB3612 CCCAGGCGCGCTTCGCCCGCAACAACGGCCAGGACGCCCCGACACCGCTTCCGAAGGAG  
CFBP2852 CCCAGGCGCGCTTCGCCCGCAACAACGGCCAGGACGCCCCGACACCGCTTCCGAAGGAG  
FDC217 CCCAGGCGCGCTTCGCCCGCAACAACGGCCAGGACGCCCCGACACCGCTTCCGAAGGAG  
FDC1083 CCCAGGCGCGCTTCGCCCGCAACAACGGCCAGGACGCCCCGACACCGCTTCCGAAGGAG  
JJ10-1 CCCAGGCGCGCTTCGCCCGCAACAACGGCCAGGACGCCCCGACACCGCTTCCGAAGGAG  
JJ238-10 CCCAGGCGCGCTTCGCCCGCAACAACGGCCAGGACGCCCCGACACCGCTTCCGAAGGAG  
JK4-1 CCCAGGCGCGCTTCGCCCGCAACAACGGCCAGGACGCCCCGACACCGCTTCCGAAGGAG  
JW160-1 CCCAGGCGCGCTTCGCCCGCAACAACGGCCAGGACGCCCCGACACCGCTTCCGAAGGAG  
LB100-1 CCCAGGCGCGCTTCGCCCGCAACAACGGCCAGGACGCCCCGACACCGCTTCCGAAGGAG  
LC80 CCCAGGCGCGCTTCGCCCGCAACAACGGCCAGGACGCCCCGACACCGCTTCCGAAGGAG  
LG117 CCCAGGCGCGCTTCGCCCGCAACAACGGCCAGGACGCCCCGACACCGCTTCCGAAGGAG  
LH37-1 CCCAGGCGCGCTTCGCCCGCAACAACGGCCAGGACGCCCCGACACCGCTTCCGAAGGAG  
LMG9322 CCCAGGCGCGCTTCGCCCGCAACAACGGCCAGGACGCCCCGACACCGCTTCCGAAGGAG  
NCPPB3562 CCCAGGCGCGCTTCGCCCGCAACAACGGCCAGGACGCCCCGACACCGCTTCCGAAGGAG  
CFBP2911 CCCAGGCGCGCTTCGCCCGCAACAACGGCCAGGACGCCCCGACACCGCTTCCGAAGGAG  
JF90-2 CCCAGGCGCGCTTCGCCCGCAACAACGGCCAGGACGCCCCGACACCGCTTCCGAAGGAG  
JK2-10 CCCAGGCGCGCTTCGCCCGCAACAACGGCCAGGACGCCCCGACACCGCTTCCGAAGGAG  
JK48 CCCAGGCGCGCTTCGCCCGCAACAACGGCCAGGACGCCCCGACACCGCTTCCGAAGGAG  
JM35 CCCAGGCGCGCTTCGCCCGCAACAACGGCCAGGACGCCCCGACACCGCTTCCGAAGGAG  
JS581 CCCAGGCGCGCTTCGCCCGCAACAACGGCCAGGACGCCCCGACACCGCTTCCGAAGGAG  
JS582 CCCAGGCGCGCTTCGCCCGCAACAACGGCCAGGACGCCCCGACACCGCTTCCGAAGGAG  
JS584 CCCAGGCGCGCTTCGCCCGCAACAACGGCCAGGACGCCCCGACACCGCTTCCGAAGGAG  
LB302 CCCAGGCGCGCTTCGCCCGCAACAACGGCCAGGACGCCCCGACACCGCTTCCGAAGGAG  
LE20-1 CCCAGGCGCGCTTCGCCCGCAACAACGGCCAGGACGCCCCGACACCGCTTCCGAAGGAG  
LG102 CCCAGGCGCGCTTCGCCCGCAACAACGGCCAGGACGCCCCGACACCGCTTCCGAAGGAG  
LG115 CCCAGGCGCGCTTCGCCCGCAACAACGGCCAGGACGCCCCGACACCGCTTCCGAAGGAG  
NCPPB3607 CCCAGGCGCGCTTCGCCCGCAACAACGGCCAGGACGCCCCGACACCGCTTCCGAAGGAG  
NCPPB3608 CCCAGGCGCGCTTCGCCCGCAACAACGGCCAGGACGCCCCGACACCGCTTCCGAAGGAG  
X2003-3218 CCCAGGCGCGCTTCGCCCGCAACAACGGCCAGGACGCCCCGACACCGCTTCCGAAGGAG  
\*\*\*\*\*

JJ238-24 AACCCACATGA  
JK143-9 AACCCACATGA  
JK143-11 AACCCACATGA  
LD71a AACCCACATGA  
C40 AACCCACATGA  
NCPPB3612 AACCCACATGA  
CFBP2852 AACCCACATGA  
FDC217 AACCCACATGA  
FDC1083 AACCCACATGA  
JJ10-1 AACCCACATGA  
JJ238-10 AACCCACATGA  
JK4-1 AACCCACATGA  
JW160-1 AACCCACATGA  
LB100-1 AACCCACATGA  
LC80 AACCCACATGA  
LG117 AACCCACATGA  
LH37-1 AACCCACATGA  
LMG9322 AACCCACATGA  
NCPPB3562 AACCCACATGA  
CFBP2911 AACCCACATGA  
JF90-2 AACCCACATGA  
JK2-10 AACCCACATGA  
JK48 AACCCACATGA  
JM35 AACCCACATGA  
JS581 AACCCACATGA  
JS582 AACCCACATGA  
JS584 AACCCACATGA  
LB302 AACCCACATGA  
LE20-1 AACCCACATGA  
LG102 AACCCACATGA  
LG115 AACCCACATGA  
NCPPB3607 AACCCACATGA  
NCPPB3608 AACCCACATGA  
X2003-3218 AACCCACATGA  
\*\*\*\*\*

**Cas7-Csd2 (Cascade)**

















|            |                             |
|------------|-----------------------------|
| C40        | GGCGTAAGCGTGACCGAACTGTTCTGA |
| CFBP2852   | GGCGTAAGCGTGACCGAACTGTTCTGA |
| CFBP2911   | GGCGTAAGCGTGACCGAACTGTTCTGA |
| FDC217     | GGCGTAAGCGTGACCGAACTGTTCTGA |
| FDC1083    | GGCGTAAGCGTGACCGAACTGTTCTGA |
| JF90-2     | GGCGTAAGCGTGACCGAACTGTTCTGA |
| JF90-8     | GGCGTAAGCGTGACCGAACTGTTCTGA |
| JJ10-1     | GGCGTAAGCGTGACCGAACTGTTCTGA |
| JJ238-10   | GGCGTAAGCGTGACCGAACTGTTCTGA |
| JJ238-24   | GGCGTAAGCGTGACCGAACTGTTCTGA |
| JK2-10     | GGCGTAAGCGTGACCGAACTGTTCTGA |
| JK4-1      | GGCGTAAGCGTGACCGAACTGTTCTGA |
| JK48       | GGCGTAAGCGTGACCGAACTGTTCTGA |
| JK143-9    | GGCGTAAGCGTGACCGAACTGTTCTGA |
| JK143-11   | GGCGTAAGCGTGACCGAACTGTTCTGA |
| JM35       | GGCGTAAGCGTGACCGAACTGTTCTGA |
| JS581      | GGCGTAAGCGTGACCGAACTGTTCTGA |
| JS582      | GGCGTAAGCGTGACCGAACTGTTCTGA |
| JS584      | GGCGTAAGCGTGACCGAACTGTTCTGA |
| JW160-1    | GGCGTAAGCGTGACCGAACTGTTCTGA |
| LB100-1    | GGCGTAAGCGTGACCGAACTGTTCTGA |
| LB302      | GGCGTAAGCGTGACCGAACTGTTCTGA |
| LC80       | GGCGTAAGCGTGACCGAACTGTTCTGA |
| LD7-1      | GGCGTAAGCGTGACCGAACTGTTCTGA |
| LD71a      | GGCGTAAGCGTGACCGAACTGTTCTGA |
| LE3-1      | GGCGTAAGCGTGACCGAACTGTTCTGA |
| LE20-1     | GGCGTAAGCGTGACCGAACTGTTCTGA |
| LE116-1    | GGCGTAAGCGTGACCGAACTGTTCTGA |
| LG97       | GGCGTAAGCGTGACCGAACTGTTCTGA |
| LG102      | GGCGTAAGCGTGACCGAACTGTTCTGA |
| LG115      | GGCGTAAGCGTGACCGAACTGTTCTGA |
| LG117      | GGCGTAAGCGTGACCGAACTGTTCTGA |
| LH37-1     | GGCGTAAGCGTGACCGAACTGTTCTGA |
| LMG9322    | GGCGTAAGCGTGACCGAACTGTTCTGA |
| NCPPB3562  | GGCGTAAGCGTGACCGAACTGTTCTGA |
| NCPPB3607  | GGCGTAAGCGTGACCGAACTGTTCTGA |
| NCPPB3608  | GGCGTAAGCGTGACCGAACTGTTCTGA |
| NCPPB3610  | GGCGTAAGCGTGACCGAACTGTTCTGA |
| NCPPB3612  | GGCGTAAGCGTGACCGAACTGTTCTGA |
| NCPPB3615  | GGCGTAAGCGTGACCGAACTGTTCTGA |
| X2003-3218 | GGCGTAAGCGTGACCGAACTGTTCTGA |
|            | *****                       |

**Cas4 (acquisition)**













|            |                                    |
|------------|------------------------------------|
| C40        | CTGCGTCGACAACCTCGATGCTGAAGAGGAATGA |
| CFBP2852   | CTGCGTCGACAACCTCGATGCTGAAGAGGAATGA |
| FDC217     | CTGCGTCGACAACCTCGATGCTGAAGAGGAATGA |
| FDC1083    | CTGCGTCGACAACCTCGATGCTGAAGAGGAATGA |
| JJ10-1     | CTGCGTCGACAACCTCGATGCTGAAGAGGAATGA |
| JJ238-10   | CTGCGTCGACAACCTCGATGCTGAAGAGGAATGA |
| JK4-1      | CTGCGTCGACAACCTCGATGCTGAAGAGGAATGA |
| JW160-1    | CTGCGTCGACAACCTCGATGCTGAAGAGGAATGA |
| LB100-1    | CTGCGTCGACAACCTCGATGCTGAAGAGGAATGA |
| LC80       | CTGCGTCGACAACCTCGATGCTGAAGAGGAATGA |
| LD7-1      | CTGCGTCGACAACCTCGATGCTGAAGAGGAATGA |
| LE116-1    | CTGCGTCGACAACCTCGATGCTGAAGAGGAATGA |
| LG117      | CTGCGTCGACAACCTCGATGCTGAAGAGGAATGA |
| LH37-1     | CTGCGTCGACAACCTCGATGCTGAAGAGGAATGA |
| LMG9322    | CTGCGTCGACAACCTCGATGCTGAAGAGGAATGA |
| NCPPB3562  | CTGCGTCGACAACCTCGATGCTGAAGAGGAATGA |
| NCPPB3610  | CTGCGTCGACAACCTCGATGCTGAAGAGGAATGA |
| NCPPB3612  | CTGCGTCGACAACCTCGATGCTGAAGAGGAATGA |
| CFBP2911   | CTGCGTCGACAACCTCGATGCTGAAGAGGAATGA |
| JF90-2     | CTGCGTCGACAACCTCGATGCTGAAGAGGAATGA |
| JF90-8     | CTGCGTCGACAACCTCGATGCTGAAGAGGAATGA |
| JJ238-24   | CTGCGTCGACAACCTCGATGCTGAAGAGGAATGA |
| JK2-10     | CTGCGTCGACAACCTCGATGCTGAAGAGGAATGA |
| JK48       | CTGCGTCGACAACCTCGATGCTGAAGAGGAATGA |
| JK143-9    | CTGCGTCGACAACCTCGATGCTGAAGAGGAATGA |
| JK143-11   | CTGCGTCGACAACCTCGATGCTGAAGAGGAATGA |
| JM35       | CTGCGTCGACAACCTCGATGCTGAAGAGGAATGA |
| JS581      | CTGCGTCGACAACCTCGATGCTGAAGAGGAATGA |
| JS582      | CTGCGTCGACAACCTCGATGCTGAAGAGGAATGA |
| JS584      | CTGCGTCGACAACCTCGATGCTGAAGAGGAATGA |
| LB302      | CTGCGTCGACAACCTCGATGCTGAAGAGGAATGA |
| LD71a      | CTGCGTCGACAACCTCGATGCTGAAGAGGAATGA |
| LE3-1      | CTGCGTCGACAACCTCGATGCTGAAGAGGAATGA |
| LE20-1     | CTGCGTCGACAACCTCGATGCTGAAGAGGAATGA |
| LG97       | CTGCGTCGACAACCTCGATGCTGAAGAGGAATGA |
| LG102      | CTGCGTCGACAACCTCGATGCTGAAGAGGAATGA |
| LG115      | CTGCGTCGACAACCTCGATGCTGAAGAGGAATGA |
| NCPPB3607  | CTGCGTCGACAACCTCGATGCTGAAGAGGAATGA |
| NCPPB3608  | CTGCGTCGACAACCTCGATGCTGAAGAGGAATGA |
| NCPPB3615  | CTGCGTCGACAACCTCGATGCTGAAGAGGAATGA |
| X2003-3218 | CTGCGTCGACAACCTCGATGCTGAAGAGGAATGA |
|            | *****                              |

**Cas1 (acquisition endonucelase)**



















JF90-8 TTTGTGCAAGCACAGTTGATGGCACGGCACCTGCGTGGCGATCTGGATGGCTACCCCTCC  
C40 TTTGTGCAAGCACAGTTGATGGCACGGCACCTGCGTGGCGATCTGGATGGCTACCCCTCC  
CFBP2852 TTTGTGCAAGCACAGTTGATGGCACGGCACCTGCGTGGCGATCTGGATGGCTACCCCTCC  
CFBP2911 TTTGTGCAAGCACAGTTGATGGCACGGCACCTGCGTGGCGATCTGGATGGCTACCCCTCC  
FDC217 TTTGTGCAAGCACAGTTGATGGCACGGCACCTGCGTGGCGATCTGGATGGCTACCCCTCC  
FDC1083 TTTGTGCAAGCACAGTTGATGGCACGGCACCTGCGTGGCGATCTGGATGGCTACCCCTCC  
JF90-2 TTTGTGCAAGCACAGTTGATGGCACGGCACCTGCGTGGCGATCTGGATGGCTACCCCTCC  
JJ10-1 TTTGTGCAAGCACAGTTGATGGCACGGCACCTGCGTGGCGATCTGGATGGCTACCCCTCC  
JJ238-10 TTTGTGCAAGCACAGTTGATGGCACGGCACCTGCGTGGCGATCTGGATGGCTACCCCTCC  
JJ238-24 TTTGTGCAAGCACAGTTGATGGCACGGCACCTGCGTGGCGATCTGGATGGCTACCCCTCC  
JK2-10 TTTGTGCAAGCACAGTTGATGGCACGGCACCTGCGTGGCGATCTGGATGGCTACCCCTCC  
JK4-1 TTTGTGCAAGCACAGTTGATGGCACGGCACCTGCGTGGCGATCTGGATGGCTACCCCTCC  
JK48 TTTGTGCAAGCACAGTTGATGGCACGGCACCTGCGTGGCGATCTGGATGGCTACCCCTCC  
JK143-9 TTTGTGCAAGCACAGTTGATGGCACGGCACCTGCGTGGCGATCTGGATGGCTACCCCTCC  
JK143-11 TTTGTGCAAGCACAGTTGATGGCACGGCACCTGCGTGGCGATCTGGATGGCTACCCCTCC  
JM35 TTTGTGCAAGCACAGTTGATGGCACGGCACCTGCGTGGCGATCTGGATGGCTACCCCTCC  
JS581 TTTGTGCAAGCACAGTTGATGGCACGGCACCTGCGTGGCGATCTGGATGGCTACCCCTCC  
JS582 TTTGTGCAAGCACAGTTGATGGCACGGCACCTGCGTGGCGATCTGGATGGCTACCCCTCC  
JS584 TTTGTGCAAGCACAGTTGATGGCACGGCACCTGCGTGGCGATCTGGATGGCTACCCCTCC  
JW160-1 TTTGTGCAAGCACAGTTGATGGCACGGCACCTGCGTGGCGATCTGGATGGCTACCCCTCC  
LB100-1 TTTGTGCAAGCACAGTTGATGGCACGGCACCTGCGTGGCGATCTGGATGGCTACCCCTCC  
LC80 TTTGTGCAAGCACAGTTGATGGCACGGCACCTGCGTGGCGATCTGGATGGCTACCCCTCC  
LD7-1 TTTGTGCAAGCACAGTTGATGGCACGGCACCTGCGTGGCGATCTGGATGGCTACCCCTCC  
LD71a TTTGTGCAAGCACAGTTGATGGCACGGCACCTGCGTGGCGATCTGGATGGCTACCCCTCC  
LE3-1 TTTGTGCAAGCACAGTTGATGGCACGGCACCTGCGTGGCGATCTGGATGGCTACCCCTCC  
LE20-1 TTTGTGCAAGCACAGTTGATGGCACGGCACCTGCGTGGCGATCTGGATGGCTACCCCTCC  
LE116-1 TTTGTGCAAGCACAGTTGATGGCACGGCACCTGCGTGGCGATCTGGATGGCTACCCCTCC  
LG97 TTTGTGCAAGCACAGTTGATGGCACGGCACCTGCGTGGCGATCTGGATGGCTACCCCTCC  
LG102 TTTGTGCAAGCACAGTTGATGGCACGGCACCTGCGTGGCGATCTGGATGGCTACCCCTCC  
LG117 TTTGTGCAAGCACAGTTGATGGCACGGCACCTGCGTGGCGATCTGGATGGCTACCCCTCC  
LH37-1 TTTGTGCAAGCACAGTTGATGGCACGGCACCTGCGTGGCGATCTGGATGGCTACCCCTCC  
LMG9322 TTTGTGCAAGCACAGTTGATGGCACGGCACCTGCGTGGCGATCTGGATGGCTACCCCTCC  
NCPPB3562 TTTGTGCAAGCACAGTTGATGGCACGGCACCTGCGTGGCGATCTGGATGGCTACCCCTCC  
NCPPB3607 TTTGTGCAAGCACAGTTGATGGCACGGCACCTGCGTGGCGATCTGGATGGCTACCCCTCC  
NCPPB3610 TTTGTGCAAGCACAGTTGATGGCACGGCACCTGCGTGGCGATCTGGATGGCTACCCCTCC  
NCPPB3612 TTTGTGCAAGCACAGTTGATGGCACGGCACCTGCGTGGCGATCTGGATGGCTACCCCTCC  
NCPPB3615 TTTGTGCAAGCACAGTTGATGGCACGGCACCTGCGTGGCGATCTGGATGGCTACCCCTCC  
LB302 TTTGTGCAAGCACAGTTGATGGCACGGCACCTGCGTGGCGATCTGGATGGCTACCCCTCC  
LG115 TTTGTGCAAGCACAGTTGATGGCACGGCACCTGCGTGGCGATCTGGATGGCTACCCCTCC  
NCPPB3608 TTTGTGCAAGCACAGTTGATGGCACGGCACCTGCGTGGCGATCTGGATGGCTACCCCTCC  
X2003-3218 TTTGTGCAAGCACAGTTGATGGCACGGCACCTGCGTGGCGATCTGGATGGCTACCCCTCC  
\*\*\*\*\*

JF90-8 TTCTTCTGGAATGA  
C40 TTCTTCTGGAATGA  
CFBP2852 TTCTTCTGGAATGA  
CFBP2911 TTCTTCTGGAATGA  
FDC217 TTCTTCTGGAATGA  
FDC1083 TTCTTCTGGAATGA  
JF90-2 TTCTTCTGGAATGA  
JJ10-1 TTCTTCTGGAATGA  
JJ238-10 TTCTTCTGGAATGA  
JJ238-24 TTCTTCTGGAATGA  
JK2-10 TTCTTCTGGAATGA  
JK4-1 TTCTTCTGGAATGA  
JK48 TTCTTCTGGAATGA  
JK143-9 TTCTTCTGGAATGA  
JK143-11 TTCTTCTGGAATGA  
JM35 TTCTTCTGGAATGA  
JS581 TTCTTCTGGAATGA  
JS582 TTCTTCTGGAATGA  
JS584 TTCTTCTGGAATGA  
JW160-1 TTCTTCTGGAATGA  
LB100-1 TTCTTCTGGAATGA  
LC80 TTCTTCTGGAATGA  
LD7-1 TTCTTCTGGAATGA  
LD71a TTCTTCTGGAATGA  
LE3-1 TTCTTCTGGAATGA  
LE20-1 TTCTTCTGGAATGA  
LE116-1 TTCTTCTGGAATGA  
LG97 TTCTTCTGGAATGA  
LG102 TTCTTCTGGAATGA  
LG117 TTCTTCTGGAATGA  
LH37-1 TTCTTCTGGAATGA  
LMG9322 TTCTTCTGGAATGA  
NCPPB3562 TTCTTCTGGAATGA  
NCPPB3607 TTCTTCTGGAATGA  
NCPPB3610 TTCTTCTGGAATGA  
NCPPB3612 TTCTTCTGGAATGA  
NCPPB3615 TTCTTCTGGAATGA  
LB302 TTCTTCTGGAATGA  
LG115 TTCTTCTGGAATGA  
NCPPB3608 TTCTTCTGGAATGA  
X2003-3218 TTCTTCTGGAATGA  
\*\*\*\*\*

**Cas2 (acquisition dsDNA endonuclease)**







|            |                                                    |
|------------|----------------------------------------------------|
| NCPFB3615  | CACATCGGGCCCAAGCCAGCCTGAACCTCAAAGGCCCACTGATTTTTTGA |
| C40        | CACATCGGGCCCAAGCCAGCCTGAACCTCAAAGGCCCACTGATTTTTTGA |
| CFBP2852   | CACATCGGGCCCAAGCCAGCCTGAACCTCAAAGGCCCACTGATTTTTTGA |
| CFBP2911   | CACATCGGGCCCAAGCCAGCCTGAACCTCAAAGGCCCACTGATTTTTTGA |
| FC217      | CACATCGGGCCCAAGCCAGCCTGAACCTCAAAGGCCCACTGATTTTTTGA |
| FDC1083    | CACATCGGGCCCAAGCCAGCCTGAACCTCAAAGGCCCACTGATTTTTTGA |
| JF90-2     | CACATCGGGCCCAAGCCAGCCTGAACCTCAAAGGCCCACTGATTTTTTGA |
| JJ10-1     | CACATCGGGCCCAAGCCAGCCTGAACCTCAAAGGCCCACTGATTTTTTGA |
| JJ238-10   | CACATCGGGCCCAAGCCAGCCTGAACCTCAAAGGCCCACTGATTTTTTGA |
| JJ238-24   | CACATCGGGCCCAAGCCAGCCTGAACCTCAAAGGCCCACTGATTTTTTGA |
| JK2-10     | CACATCGGGCCCAAGCCAGCCTGAACCTCAAAGGCCCACTGATTTTTTGA |
| JK4-1      | CACATCGGGCCCAAGCCAGCCTGAACCTCAAAGGCCCACTGATTTTTTGA |
| JK48       | CACATCGGGCCCAAGCCAGCCTGAACCTCAAAGGCCCACTGATTTTTTGA |
| JK143-9    | CACATCGGGCCCAAGCCAGCCTGAACCTCAAAGGCCCACTGATTTTTTGA |
| JK143-11   | CACATCGGGCCCAAGCCAGCCTGAACCTCAAAGGCCCACTGATTTTTTGA |
| JM35       | CACATCGGGCCCAAGCCAGCCTGAACCTCAAAGGCCCACTGATTTTTTGA |
| J5581      | CACATCGGGCCCAAGCCAGCCTGAACCTCAAAGGCCCACTGATTTTTTGA |
| J5582      | CACATCGGGCCCAAGCCAGCCTGAACCTCAAAGGCCCACTGATTTTTTGA |
| J5584      | CACATCGGGCCCAAGCCAGCCTGAACCTCAAAGGCCCACTGATTTTTTGA |
| JW160-1    | CACATCGGGCCCAAGCCAGCCTGAACCTCAAAGGCCCACTGATTTTTTGA |
| LB100-1    | CACATCGGGCCCAAGCCAGCCTGAACCTCAAAGGCCCACTGATTTTTTGA |
| LC80       | CACATCGGGCCCAAGCCAGCCTGAACCTCAAAGGCCCACTGATTTTTTGA |
| LD7-1      | CACATCGGGCCCAAGCCAGCCTGAACCTCAAAGGCCCACTGATTTTTTGA |
| LD71a      | CACATCGGGCCCAAGCCAGCCTGAACCTCAAAGGCCCACTGATTTTTTGA |
| LE3-1      | CACATCGGGCCCAAGCCAGCCTGAACCTCAAAGGCCCACTGATTTTTTGA |
| LE20-1     | CACATCGGGCCCAAGCCAGCCTGAACCTCAAAGGCCCACTGATTTTTTGA |
| LE116-1    | CACATCGGGCCCAAGCCAGCCTGAACCTCAAAGGCCCACTGATTTTTTGA |
| LG117      | CACATCGGGCCCAAGCCAGCCTGAACCTCAAAGGCCCACTGATTTTTTGA |
| LH37-1     | CACATCGGGCCCAAGCCAGCCTGAACCTCAAAGGCCCACTGATTTTTTGA |
| LMG9322    | CACATCGGGCCCAAGCCAGCCTGAACCTCAAAGGCCCACTGATTTTTTGA |
| NCPFB3562  | CACATCGGGCCCAAGCCAGCCTGAACCTCAAAGGCCCACTGATTTTTTGA |
| NCPFB3607  | CACATCGGGCCCAAGCCAGCCTGAACCTCAAAGGCCCACTGATTTTTTGA |
| NCPFB3610  | CACATCGGGCCCAAGCCAGCCTGAACCTCAAAGGCCCACTGATTTTTTGA |
| NCPFB3612  | CACATCGGGCCCAAGCCAGCCTGAACCTCAAAGGCCCACTGATTTTTTGA |
| LB302      | CACATCGGGCCCAAGCCAGCCTGAACCTCAAAGGCCCACTGATTTTTTGA |
| LG115      | CACATCGGGCCCAAGCCAGCCTGAACCTCAAAGGCCCACTGATTTTTTGA |
| NCPFB3608  | CACATCGGGCCCAAGCCAGCCTGAACCTCAAAGGCCCACTGATTTTTTGA |
| X2003-3218 | CACATCGGGCCCAAGCCAGCCTGAACCTCAAAGGCCCACTGATTTTTTGA |
| LG97       | CACATCGGGCCCAAGCCAGCCTGAACCTCAAAGGCCCACTGATTTTTTGA |
| LG102      | CACATCGGGCCCAAGCCAGCCTGAACCTCAAAGGCCCACTGATTTTTTGA |
| JF90-8     | CACATCGGGCCCAAGCCAGCCTGAACCTCAAAGGCCCACTGATTTTTTGA |
|            | *****                                              |
